# Supplementary material
Source: PubMed Central journal article supplement (PMC10439739)
Supplement: NIHMS1922523-supplement-Supplementary_Tables_1-7.pdf [file NIHMS1922523-supplement-Supplementary_Tables_1-7.pdf]

**Supplementary Table1**

Differentially expressed genes of malignant Seurat clusters (mouse) related to Figure Data 1. P value was calculated using non-parametric Wilcoxon rank sum test and with Bonferroni correction for multiple testing.

|             | <b>p_val</b> | <b>g_logf</b> | <b>pct.1</b> | <b>pct.2</b> | <b>p_val_adj</b> | <b>cluster</b> |
|-------------|--------------|---------------|--------------|--------------|------------------|----------------|
| Mlana       | 0            | 1,61          | 1            | 0,954        | 0                | 0              |
| Ptgds       | 0            | 1,18          | 1            | 0,996        | 0                | 0              |
| Car2        | 0            | 1,16          | 1            | 0,939        | 0                | 0              |
| Dct         | 0            | 1,11          | 1            | 0,992        | 0                | 0              |
| Pmel        | 0            | 0,89          | 0,81         | 0,591        | 0                | 0              |
| Slc45a2     | 0            | 0,81          | 1            | 0,902        | 0                | 0              |
| Car6        | 0            | 0,81          | 0,98         | 0,847        | 0                | 0              |
| Syng1       | 0            | 0,77          | 1            | 0,991        | 0                | 0              |
| Gstp1       | 0            | 0,76          | 1            | 0,981        | 0                | 0              |
| Cst6        | 0            | 0,74          | 1            | 0,998        | 0                | 0              |
| Gpnmb       | 0            | 0,71          | 1            | 0,998        | 0                | 0              |
| Chchd10     | 0            | 0,71          | 0,84         | 0,639        | 0                | 0              |
| Lgals3      | 0            | 0,69          | 0,99         | 0,957        | 0                | 0              |
| Car14       | 0            | 0,66          | 0,57         | 0,175        | 0                | 0              |
| Sparcl1     | 0            | 0,65          | 0,99         | 0,959        | 0                | 0              |
| Hpse        | 0            | 0,65          | 1            | 0,979        | 0                | 0              |
| Gsta4       | 0            | 0,64          | 0,58         | 0,241        | 0                | 0              |
| Mcoln3      | 0            | 0,64          | 0,9          | 0,585        | 0                | 0              |
| Aebp1       | 0            | 0,64          | 1            | 0,997        | 0                | 0              |
| Fxyd3       | 0            | 0,63          | 0,98         | 0,935        | 0                | 0              |
| Cox6c       | 0            | 0,62          | 1            | 1            | 0                | 0              |
| Uba52       | 0            | 0,6           | 0,98         | 0,948        | 0                | 0              |
| Cox7c       | 0            | 0,59          | 1            | 1            | 0                | 0              |
| Lgals1      | 0            | 0,59          | 0,99         | 0,974        | 0                | 0              |
| Cox6a1      | 0            | 0,59          | 1            | 0,997        | 0                | 0              |
| Gm2115      | 0            | 0,58          | 0,83         | 0,534        | 0                | 0              |
| Ndufb2      | 0            | 0,58          | 1            | 0,999        | 0                | 0              |
| Cox7a2      | 0            | 0,58          | 1            | 0,994        | 0                | 0              |
| Apoe        | 0            | 0,58          | 1            | 0,999        | 0                | 0              |
| Enho        | 0            | 0,57          | 0,99         | 0,906        | 0                | 0              |
| Gjb6        | 0            | 0,57          | 0,84         | 0,498        | 0                | 0              |
| Cyb5a       | 0            | 0,57          | 1            | 0,971        | 0                | 0              |
| Cited1      | 0            | 0,57          | 0,82         | 0,488        | 0                | 0              |
| Hpgds       | 0            | 0,57          | 0,9          | 0,675        | 0                | 0              |
| Ndufa1      | 0            | 0,56          | 1            | 0,977        | 0                | 0              |
| Rps28       | 0            | 0,56          | 1            | 1            | 0                | 0              |
| Scrg1       | 0            | 0,55          | 0,94         | 0,776        | 0                | 0              |
| Cox4i1      | 0            | 0,54          | 1            | 1            | 0                | 0              |
| 010107E04R1 | 0            | 0,54          | 1            | 0,996        | 0                | 0              |
| Cox7b       | 0            | 0,53          | 0,99         | 0,973        | 0                | 0              |
| Cd63        | 0            | 0,53          | 1            | 1            | 0                | 0              |
| Kcnj10      | 0            | 0,52          | 1            | 0,976        | 0                | 0              |

|            |   |      |      |       |   |   |
|------------|---|------|------|-------|---|---|
| Pla2g2e    | 0 | 0,52 | 0,52 | 0,194 | 0 | 0 |
| Uqcc2      | 0 | 0,51 | 1    | 0,988 | 0 | 0 |
| Cox6b1     | 0 | 0,51 | 1    | 0,998 | 0 | 0 |
| S100b      | 0 | 0,51 | 1    | 0,992 | 0 | 0 |
| Cryab      | 0 | 0,5  | 0,93 | 0,789 | 0 | 0 |
| Ppia       | 0 | 0,5  | 1    | 1     | 0 | 0 |
| Rpl35      | 0 | 0,5  | 1    | 0,999 | 0 | 0 |
| Uqcr11     | 0 | 0,5  | 1    | 0,998 | 0 | 0 |
| Cox5a      | 0 | 0,49 | 0,99 | 0,95  | 0 | 0 |
| Rasgrp3    | 0 | 0,49 | 0,45 | 0,149 | 0 | 0 |
| Atp5j2     | 0 | 0,49 | 1    | 0,999 | 0 | 0 |
| 031439G07R | 0 | 0,48 | 0,99 | 0,947 | 0 | 0 |
| Adm        | 0 | 0,48 | 0,69 | 0,343 | 0 | 0 |
| Uqcr10     | 0 | 0,48 | 0,99 | 0,965 | 0 | 0 |
| Gpx2       | 0 | 0,48 | 0,43 | 0,124 | 0 | 0 |
| Ndufb4     | 0 | 0,48 | 0,99 | 0,965 | 0 | 0 |
| Vamp5      | 0 | 0,48 | 0,9  | 0,719 | 0 | 0 |
| Atp5j      | 0 | 0,47 | 1    | 0,994 | 0 | 0 |
| Uqcrb      | 0 | 0,47 | 1    | 0,978 | 0 | 0 |
| Slc25a4    | 0 | 0,47 | 1    | 0,999 | 0 | 0 |
| Rpl41      | 0 | 0,46 | 1    | 1     | 0 | 0 |
| Atp1b3     | 0 | 0,46 | 1    | 0,992 | 0 | 0 |
| Cox17      | 0 | 0,46 | 0,94 | 0,851 | 0 | 0 |
| Slc25a5    | 0 | 0,45 | 1    | 0,979 | 0 | 0 |
| Cox8a      | 0 | 0,45 | 1    | 1     | 0 | 0 |
| Tspan10    | 0 | 0,45 | 0,44 | 0,142 | 0 | 0 |
| Ndufc1     | 0 | 0,45 | 0,99 | 0,973 | 0 | 0 |
| Rpl32      | 0 | 0,45 | 1    | 1     | 0 | 0 |
| Glrb       | 0 | 0,45 | 0,98 | 0,864 | 0 | 0 |
| Plxnc1     | 0 | 0,44 | 0,52 | 0,205 | 0 | 0 |
| Atp5l      | 0 | 0,44 | 1    | 0,998 | 0 | 0 |
| Tmem256    | 0 | 0,44 | 0,97 | 0,893 | 0 | 0 |
| Nerf       | 0 | 0,44 | 1    | 0,982 | 0 | 0 |
| S100a1     | 0 | 0,44 | 1    | 0,981 | 0 | 0 |
| Ftl1       | 0 | 0,44 | 1    | 1     | 0 | 0 |
| Atp5k      | 0 | 0,44 | 1    | 0,991 | 0 | 0 |
| Tyr        | 0 | 0,43 | 1    | 0,972 | 0 | 0 |
| Rps25      | 0 | 0,42 | 1    | 1     | 0 | 0 |
| Atp5e      | 0 | 0,42 | 1    | 1     | 0 | 0 |
| Rpl37      | 0 | 0,42 | 1    | 1     | 0 | 0 |
| Rps23      | 0 | 0,42 | 1    | 1     | 0 | 0 |
| Rpl36      | 0 | 0,41 | 1    | 1     | 0 | 0 |
| Gjb2       | 0 | 0,41 | 0,65 | 0,35  | 0 | 0 |
| Rps7       | 0 | 0,41 | 1    | 0,999 | 0 | 0 |
| Cox5b      | 0 | 0,41 | 1    | 0,989 | 0 | 0 |
| Nceh1      | 0 | 0,41 | 0,99 | 0,938 | 0 | 0 |

|         |   |      |      |       |   |   |
|---------|---|------|------|-------|---|---|
| Rpl37a  | 0 | 0,41 | 1    | 1     | 0 | 0 |
| C2      | 0 | 0,41 | 0,92 | 0,74  | 0 | 0 |
| Gm10076 | 0 | 0,4  | 0,99 | 0,98  | 0 | 0 |
| Uqcrh   | 0 | 0,4  | 1    | 0,999 | 0 | 0 |
| Vegfb   | 0 | 0,4  | 0,83 | 0,619 | 0 | 0 |
| Ctsb    | 0 | 0,4  | 1    | 1     | 0 | 0 |
| Ndufb9  | 0 | 0,4  | 1    | 0,993 | 0 | 0 |
| Rps27a  | 0 | 0,4  | 1    | 1     | 0 | 0 |
| Tomm7   | 0 | 0,4  | 1    | 0,991 | 0 | 0 |
| Nrp2    | 0 | 0,4  | 1    | 0,943 | 0 | 0 |
| Bace2   | 0 | 0,4  | 0,96 | 0,857 | 0 | 0 |
| Rps6    | 0 | 0,4  | 1    | 0,999 | 0 | 0 |
| Gsta1   | 0 | 0,4  | 0,35 | 0,083 | 0 | 0 |
| Uqcrq   | 0 | 0,4  | 1    | 0,996 | 0 | 0 |
| Rpl23a  | 0 | 0,4  | 1    | 1     | 0 | 0 |
| Rpl39   | 0 | 0,39 | 1    | 1     | 0 | 0 |
| Rplp2   | 0 | 0,39 | 1    | 1     | 0 | 0 |
| Oxct1   | 0 | 0,39 | 1    | 0,967 | 0 | 0 |
| Dkk3    | 0 | 0,39 | 1    | 0,989 | 0 | 0 |
| Idh2    | 0 | 0,39 | 0,89 | 0,725 | 0 | 0 |
| Rps13   | 0 | 0,39 | 1    | 1     | 0 | 0 |
| Mitf    | 0 | 0,39 | 0,99 | 0,894 | 0 | 0 |
| Rps17   | 0 | 0,39 | 1    | 1     | 0 | 0 |
| Ndufa13 | 0 | 0,39 | 1    | 1     | 0 | 0 |
| Gm3776  | 0 | 0,39 | 0,35 | 0,087 | 0 | 0 |
| Vamp8   | 0 | 0,39 | 0,99 | 0,925 | 0 | 0 |
| Rps18   | 0 | 0,38 | 1    | 1     | 0 | 0 |
| Atp5g2  | 0 | 0,38 | 1    | 1     | 0 | 0 |
| Rps29   | 0 | 0,38 | 1    | 1     | 0 | 0 |
| Rplp1   | 0 | 0,38 | 1    | 1     | 0 | 0 |
| Rps15a  | 0 | 0,38 | 1    | 1     | 0 | 0 |
| Cerk    | 0 | 0,38 | 0,96 | 0,809 | 0 | 0 |
| Rpl36a  | 0 | 0,38 | 1    | 1     | 0 | 0 |
| Ss18l2  | 0 | 0,37 | 0,99 | 0,956 | 0 | 0 |
| Ifitm3  | 0 | 0,37 | 1    | 0,999 | 0 | 0 |
| Tmem160 | 0 | 0,37 | 0,95 | 0,851 | 0 | 0 |
| Ndufb11 | 0 | 0,36 | 1    | 0,987 | 0 | 0 |
| Mif     | 0 | 0,36 | 1    | 0,995 | 0 | 0 |
| Rpl31   | 0 | 0,36 | 1    | 0,998 | 0 | 0 |
| Rpl18a  | 0 | 0,36 | 1    | 1     | 0 | 0 |
| Chchd2  | 0 | 0,36 | 1    | 1     | 0 | 0 |
| Eno1    | 0 | 0,36 | 0,99 | 0,934 | 0 | 0 |
| Rpl10a  | 0 | 0,36 | 1    | 1     | 0 | 0 |
| Mlph    | 0 | 0,35 | 0,89 | 0,708 | 0 | 0 |
| Atp5b   | 0 | 0,35 | 1    | 0,998 | 0 | 0 |
| Rpl11   | 0 | 0,35 | 1    | 1     | 0 | 0 |

|                |           |      |      |       |           |   |
|----------------|-----------|------|------|-------|-----------|---|
| Ndufb5         | 0         | 0,35 | 0,98 | 0,943 | 0         | 0 |
| Atp6ap2        | 0         | 0,35 | 1    | 0,99  | 0         | 0 |
| Selenop        | 0         | 0,35 | 1    | 0,994 | 0         | 0 |
| Ndufb7         | 0         | 0,35 | 1    | 0,991 | 0         | 0 |
| Atp5h          | 0         | 0,35 | 1    | 0,998 | 0         | 0 |
| Rps2           | 0         | 0,35 | 1    | 1     | 0         | 0 |
| Ndufa7         | 0         | 0,34 | 1    | 0,997 | 0         | 0 |
| Rps16          | 0         | 0,34 | 1    | 1     | 0         | 0 |
| Ii10rb         | 0         | 0,34 | 0,97 | 0,852 | 0         | 0 |
| Sec11c         | 0         | 0,34 | 0,99 | 0,968 | 0         | 0 |
| Rps14          | 0         | 0,34 | 1    | 1     | 0         | 0 |
| Hint1          | 0         | 0,34 | 1    | 0,997 | 0         | 0 |
| Rpl35a         | 0         | 0,34 | 1    | 1     | 0         | 0 |
| Rpl810058I24Ri | 0         | 0,34 | 1    | 1     | 0         | 0 |
| Oaz1           | 0         | 0,34 | 1    | 0,999 | 0         | 0 |
| Ndufa4         | 0         | 0,34 | 1    | 0,998 | 0         | 0 |
| Rps15          | 0         | 0,34 | 1    | 1     | 0         | 0 |
| Rnf7           | 0         | 0,33 | 0,98 | 0,935 | 0         | 0 |
| Rpl6           | 0         | 0,33 | 1    | 1     | 0         | 0 |
| Gpx4           | 0         | 0,33 | 1    | 1     | 0         | 0 |
| Atp1a1         | 0         | 0,33 | 1    | 1     | 0         | 0 |
| Rpl10          | 0         | 0,33 | 1    | 1     | 0         | 0 |
| Bri3           | 0         | 0,33 | 1    | 0,984 | 0         | 0 |
| Nipal3         | 0         | 0,33 | 0,98 | 0,929 | 0         | 0 |
| Rpl2211        | 0         | 0,33 | 1    | 1     | 0         | 0 |
| Rpl34          | 0         | 0,32 | 1    | 1     | 0         | 0 |
| Rpl13          | 0         | 0,32 | 1    | 1     | 0         | 0 |
| Rpl23          | 0         | 0,32 | 1    | 1     | 0         | 0 |
| Park7          | 0         | 0,31 | 0,98 | 0,939 | 0         | 0 |
| Eef1a1         | 0         | 0,31 | 1    | 1     | 0         | 0 |
| Rps9           | 0         | 0,3  | 1    | 1     | 0         | 0 |
| Atp6v1f        | 0         | 0,3  | 1    | 1     | 0         | 0 |
| Pole4          | 1,52E-307 | 0,33 | 0,94 | 0,842 | 2,70E-303 | 0 |
| Glul           | 5,67E-304 | 0,45 | 0,71 | 0,47  | 1,01E-299 | 0 |
| Sem1           | 1,31E-303 | 0,35 | 1    | 0,994 | 2,33E-299 | 0 |
| Mrpl52         | 5,88E-303 | 0,33 | 1    | 0,989 | 1,05E-298 | 0 |
| Cox14          | 1,46E-302 | 0,34 | 0,99 | 0,959 | 2,60E-298 | 0 |
| Atp5c1         | 2,84E-302 | 0,35 | 0,99 | 0,972 | 5,05E-298 | 0 |
| Psen2          | 8,08E-298 | 0,32 | 0,98 | 0,901 | 1,44E-293 | 0 |
| Timp2          | 3,32E-296 | 0,35 | 1    | 0,992 | 5,92E-292 | 0 |
| Ndufa3         | 7,51E-296 | 0,35 | 0,99 | 0,95  | 1,34E-291 | 0 |
| Acyp2          | 5,35E-292 | 0,37 | 0,76 | 0,553 | 9,53E-288 | 0 |
| Atp5g3         | 3,04E-289 | 0,46 | 0,99 | 0,957 | 5,41E-285 | 0 |
| Atp5o.1        | 6,70E-287 | 0,39 | 0,99 | 0,966 | 1,19E-282 | 0 |
| Rab27a         | 3,55E-286 | 0,32 | 0,42 | 0,165 | 6,32E-282 | 0 |
| Ndufa2         | 1,93E-284 | 0,34 | 1    | 0,998 | 3,43E-280 | 0 |

|            |           |      |      |       |           |   |
|------------|-----------|------|------|-------|-----------|---|
| Scn8a      | 2,76E-284 | 0,34 | 0,52 | 0,252 | 4,91E-280 | 0 |
| Ndufa5     | 2,63E-282 | 0,34 | 0,98 | 0,939 | 4,68E-278 | 0 |
| Chd3       | 2,18E-280 | 0,3  | 0,99 | 0,921 | 3,88E-276 | 0 |
| Ndufb10    | 2,64E-279 | 0,33 | 0,98 | 0,962 | 4,71E-275 | 0 |
| Slc12a2    | 5,84E-279 | 0,38 | 0,98 | 0,903 | 1,04E-274 | 0 |
| Atp5g1     | 9,05E-279 | 0,34 | 0,99 | 0,975 | 1,61E-274 | 0 |
| Ndufs6     | 1,53E-276 | 0,31 | 0,96 | 0,912 | 2,72E-272 | 0 |
| Spg21      | 2,30E-273 | 0,31 | 0,91 | 0,808 | 4,09E-269 | 0 |
| Usmg5      | 2,17E-272 | 0,4  | 1    | 0,994 | 3,86E-268 | 0 |
| 410015M20R | 1,83E-271 | 0,31 | 0,98 | 0,952 | 3,26E-267 | 0 |
| Ndufa11    | 2,12E-271 | 0,31 | 0,99 | 0,972 | 3,77E-267 | 0 |
| Ndufb8     | 1,12E-267 | 0,31 | 0,98 | 0,955 | 2,00E-263 | 0 |
| Rpl27      | 1,41E-265 | 0,46 | 0,98 | 0,95  | 2,52E-261 | 0 |
| Mrps21     | 1,50E-263 | 0,35 | 0,94 | 0,888 | 2,66E-259 | 0 |
| Ifi27      | 3,13E-258 | 0,36 | 0,97 | 0,925 | 5,57E-254 | 0 |
| Nop10      | 9,49E-256 | 0,31 | 0,95 | 0,894 | 1,69E-251 | 0 |
| Rpl13a     | 6,21E-253 | 0,32 | 0,99 | 0,967 | 1,11E-248 | 0 |
| Agt        | 1,62E-243 | 0,33 | 0,99 | 0,921 | 2,89E-239 | 0 |
| Lsm4       | 4,64E-243 | 0,31 | 0,92 | 0,853 | 8,26E-239 | 0 |
| Npnt       | 1,07E-240 | 0,33 | 0,41 | 0,18  | 1,90E-236 | 0 |
| Minos1     | 6,26E-239 | 0,34 | 0,98 | 0,94  | 1,11E-234 | 0 |
| Fmc1       | 5,16E-231 | 0,42 | 0,96 | 0,917 | 9,19E-227 | 0 |
| Anapc13    | 1,32E-223 | 0,32 | 0,89 | 0,782 | 2,35E-219 | 0 |
| Met        | 3,75E-216 | 0,35 | 0,83 | 0,675 | 6,67E-212 | 0 |
| Cyp4b1     | 5,40E-215 | 0,41 | 0,88 | 0,774 | 9,62E-211 | 0 |
| Ednrb      | 4,53E-212 | 0,36 | 0,93 | 0,805 | 8,06E-208 | 0 |
| Atp1b1     | 5,34E-212 | 0,4  | 0,95 | 0,879 | 9,51E-208 | 0 |
| Olfm2      | 2,37E-204 | 0,33 | 0,3  | 0,119 | 4,21E-200 | 0 |
| Fuom       | 4,90E-202 | 0,34 | 0,55 | 0,337 | 8,73E-198 | 0 |
| Ctsd       | 9,30E-201 | 0,41 | 1    | 1     | 1,66E-196 | 0 |
| Mrps33     | 8,13E-188 | 0,3  | 1    | 0,993 | 1,45E-183 | 0 |
| Bmyc       | 4,88E-186 | 0,42 | 0,42 | 0,226 | 8,70E-182 | 0 |
| Gstp2      | 2,09E-177 | 0,37 | 0,49 | 0,302 | 3,73E-173 | 0 |
| Churc1     | 7,18E-177 | 0,31 | 0,74 | 0,583 | 1,28E-172 | 0 |
| Rlbp1      | 2,37E-168 | 0,31 | 0,49 | 0,297 | 4,22E-164 | 0 |
| Smim4      | 3,44E-162 | 0,31 | 0,63 | 0,453 | 6,13E-158 | 0 |
| Mest       | 0         | 1,23 | 0,96 | 0,819 | 0         | 1 |
| Wnt4       | 0         | 1,08 | 0,87 | 0,578 | 0         | 1 |
| Fn1        | 0         | 1,01 | 1    | 0,989 | 0         | 1 |
| Akap12     | 0         | 0,97 | 1    | 0,989 | 0         | 1 |
| Sema5a     | 0         | 0,92 | 0,64 | 0,186 | 0         | 1 |
| Trf        | 0         | 0,91 | 1    | 0,994 | 0         | 1 |
| Slc29a1    | 0         | 0,89 | 0,98 | 0,884 | 0         | 1 |
| Csn3       | 0         | 0,88 | 0,99 | 0,977 | 0         | 1 |
| Kctd12     | 0         | 0,87 | 0,89 | 0,744 | 0         | 1 |
| Emilin1    | 0         | 0,83 | 0,92 | 0,79  | 0         | 1 |

|           |   |      |      |       |   |   |
|-----------|---|------|------|-------|---|---|
| Postn     | 0 | 0,82 | 0,85 | 0,77  | 0 | 1 |
| Sema3d    | 0 | 0,82 | 1    | 0,977 | 0 | 1 |
| Dhh       | 0 | 0,81 | 0,99 | 0,936 | 0 | 1 |
| Igf1      | 0 | 0,8  | 0,94 | 0,781 | 0 | 1 |
| Moxd1     | 0 | 0,8  | 0,68 | 0,263 | 0 | 1 |
| Lmcd1     | 0 | 0,8  | 0,91 | 0,724 | 0 | 1 |
| Cd200     | 0 | 0,8  | 1    | 0,982 | 0 | 1 |
| Fibin     | 0 | 0,8  | 0,98 | 0,941 | 0 | 1 |
| Igfbp4    | 0 | 0,79 | 1    | 0,976 | 0 | 1 |
| Aqp1      | 0 | 0,77 | 0,46 | 0,152 | 0 | 1 |
| Qpct      | 0 | 0,75 | 0,97 | 0,944 | 0 | 1 |
| Thsd7a    | 0 | 0,73 | 0,59 | 0,113 | 0 | 1 |
| Mgp       | 0 | 0,69 | 1    | 0,996 | 0 | 1 |
| Lbhd2     | 0 | 0,68 | 0,92 | 0,79  | 0 | 1 |
| Timp1     | 0 | 0,68 | 0,98 | 0,952 | 0 | 1 |
| Cavin2    | 0 | 0,68 | 0,94 | 0,881 | 0 | 1 |
| Plvap     | 0 | 0,67 | 0,81 | 0,476 | 0 | 1 |
| Enpp2     | 0 | 0,66 | 0,89 | 0,781 | 0 | 1 |
| Serpina3n | 0 | 0,66 | 0,99 | 0,98  | 0 | 1 |
| Spry4     | 0 | 0,65 | 0,94 | 0,831 | 0 | 1 |
| Gja1      | 0 | 0,64 | 0,99 | 0,961 | 0 | 1 |
| Ltbp1     | 0 | 0,63 | 0,98 | 0,902 | 0 | 1 |
| Tmem37    | 0 | 0,62 | 0,81 | 0,551 | 0 | 1 |
| Tmem158   | 0 | 0,62 | 0,81 | 0,563 | 0 | 1 |
| Tm4sf1    | 0 | 0,62 | 1    | 0,999 | 0 | 1 |
| Gsn       | 0 | 0,6  | 1    | 0,995 | 0 | 1 |
| Egfl8     | 0 | 0,6  | 0,61 | 0,193 | 0 | 1 |
| Sulf2     | 0 | 0,59 | 0,99 | 0,926 | 0 | 1 |
| Fxyd5     | 0 | 0,59 | 0,97 | 0,943 | 0 | 1 |
| Col11a1   | 0 | 0,58 | 0,71 | 0,404 | 0 | 1 |
| Chl1      | 0 | 0,58 | 0,97 | 0,922 | 0 | 1 |
| Ephx1     | 0 | 0,57 | 0,92 | 0,787 | 0 | 1 |
| Bpgm      | 0 | 0,57 | 0,99 | 0,947 | 0 | 1 |
| Spon1     | 0 | 0,57 | 1    | 0,98  | 0 | 1 |
| Abcg2     | 0 | 0,57 | 0,71 | 0,463 | 0 | 1 |
| Sdc4      | 0 | 0,56 | 0,98 | 0,957 | 0 | 1 |
| Fth1      | 0 | 0,56 | 1    | 1     | 0 | 1 |
| Itgb5     | 0 | 0,56 | 0,85 | 0,622 | 0 | 1 |
| Cxxc4     | 0 | 0,55 | 0,62 | 0,211 | 0 | 1 |
| Egflam    | 0 | 0,55 | 0,55 | 0,12  | 0 | 1 |
| Snhg18    | 0 | 0,55 | 0,93 | 0,852 | 0 | 1 |
| Gpm6b     | 0 | 0,54 | 0,99 | 0,968 | 0 | 1 |
| Itga2     | 0 | 0,54 | 0,66 | 0,222 | 0 | 1 |
| Tgfb2     | 0 | 0,53 | 0,76 | 0,467 | 0 | 1 |
| Sept11    | 0 | 0,53 | 0,9  | 0,711 | 0 | 1 |
| Pnp       | 0 | 0,53 | 0,95 | 0,919 | 0 | 1 |

|         |   |      |      |       |   |   |
|---------|---|------|------|-------|---|---|
| Actb    | 0 | 0,53 | 1    | 1     | 0 | 1 |
| Adamts1 | 0 | 0,53 | 1    | 0,994 | 0 | 1 |
| Ajap1   | 0 | 0,53 | 0,99 | 0,952 | 0 | 1 |
| Dtx4    | 0 | 0,52 | 0,64 | 0,218 | 0 | 1 |
| Crot    | 0 | 0,52 | 0,95 | 0,871 | 0 | 1 |
| Dbi     | 0 | 0,52 | 1    | 1     | 0 | 1 |
| Plpp1   | 0 | 0,52 | 0,99 | 0,958 | 0 | 1 |
| Syt11   | 0 | 0,52 | 0,97 | 0,926 | 0 | 1 |
| Thbs1   | 0 | 0,52 | 0,88 | 0,82  | 0 | 1 |
| Mmp16   | 0 | 0,51 | 0,98 | 0,874 | 0 | 1 |
| Ccnd2   | 0 | 0,51 | 1    | 1     | 0 | 1 |
| Limd1   | 0 | 0,51 | 1    | 0,988 | 0 | 1 |
| Morc4   | 0 | 0,51 | 0,49 | 0,181 | 0 | 1 |
| Cxxc5   | 0 | 0,51 | 0,93 | 0,843 | 0 | 1 |
| Nt5e    | 0 | 0,51 | 0,42 | 0,091 | 0 | 1 |
| Capn5   | 0 | 0,51 | 0,63 | 0,208 | 0 | 1 |
| Igsf10  | 0 | 0,51 | 0,49 | 0,145 | 0 | 1 |
| Fblim1  | 0 | 0,5  | 0,9  | 0,707 | 0 | 1 |
| Mcam    | 0 | 0,5  | 0,97 | 0,937 | 0 | 1 |
| Cdkn2b  | 0 | 0,49 | 0,98 | 0,939 | 0 | 1 |
| Adgra2  | 0 | 0,49 | 0,78 | 0,527 | 0 | 1 |
| Folr2   | 0 | 0,49 | 0,41 | 0,15  | 0 | 1 |
| Tfap2b  | 0 | 0,49 | 0,96 | 0,909 | 0 | 1 |
| Cd9     | 0 | 0,49 | 0,99 | 0,984 | 0 | 1 |
| Kcnn4   | 0 | 0,49 | 1    | 0,976 | 0 | 1 |
| Tnfaip2 | 0 | 0,49 | 0,86 | 0,755 | 0 | 1 |
| Lrp12   | 0 | 0,49 | 0,73 | 0,343 | 0 | 1 |
| Kif26b  | 0 | 0,48 | 0,56 | 0,164 | 0 | 1 |
| Npr1    | 0 | 0,48 | 0,71 | 0,292 | 0 | 1 |
| Sox2    | 0 | 0,48 | 0,63 | 0,212 | 0 | 1 |
| Sema3b  | 0 | 0,48 | 0,99 | 0,964 | 0 | 1 |
| Cd81    | 0 | 0,48 | 1    | 1     | 0 | 1 |
| Tmsb4x  | 0 | 0,48 | 1    | 1     | 0 | 1 |
| Efhd1   | 0 | 0,48 | 0,65 | 0,26  | 0 | 1 |
| Art3    | 0 | 0,47 | 0,62 | 0,245 | 0 | 1 |
| Sema3f  | 0 | 0,47 | 0,89 | 0,748 | 0 | 1 |
| Myof    | 0 | 0,47 | 0,64 | 0,253 | 0 | 1 |
| Chpf    | 0 | 0,47 | 0,94 | 0,854 | 0 | 1 |
| Glg1    | 0 | 0,46 | 1    | 0,996 | 0 | 1 |
| Me2     | 0 | 0,46 | 0,62 | 0,271 | 0 | 1 |
| Gm26778 | 0 | 0,46 | 0,5  | 0,159 | 0 | 1 |
| Wfdc1   | 0 | 0,45 | 0,78 | 0,524 | 0 | 1 |
| Suco    | 0 | 0,45 | 0,92 | 0,815 | 0 | 1 |
| Ltbp3   | 0 | 0,45 | 0,99 | 0,973 | 0 | 1 |
| Gnai2   | 0 | 0,45 | 1    | 1     | 0 | 1 |
| Cald1   | 0 | 0,44 | 0,99 | 0,976 | 0 | 1 |

|          |   |      |      |       |   |   |
|----------|---|------|------|-------|---|---|
| Cdkn2a   | 0 | 0,44 | 0,95 | 0,876 | 0 | 1 |
| Ppp2r2b  | 0 | 0,44 | 0,91 | 0,778 | 0 | 1 |
| Gfra1    | 0 | 0,44 | 0,99 | 0,982 | 0 | 1 |
| Pcdh18   | 0 | 0,44 | 0,59 | 0,221 | 0 | 1 |
| Myo10    | 0 | 0,44 | 1    | 0,995 | 0 | 1 |
| Slc25a34 | 0 | 0,44 | 0,62 | 0,242 | 0 | 1 |
| Hmcn1    | 0 | 0,44 | 0,52 | 0,153 | 0 | 1 |
| Rgs2     | 0 | 0,44 | 0,54 | 0,216 | 0 | 1 |
| Gnb4     | 0 | 0,44 | 0,98 | 0,935 | 0 | 1 |
| Oxr1     | 0 | 0,43 | 0,99 | 0,95  | 0 | 1 |
| S100a6   | 0 | 0,43 | 1    | 0,989 | 0 | 1 |
| Tbx3     | 0 | 0,43 | 0,56 | 0,183 | 0 | 1 |
| Grasp    | 0 | 0,43 | 0,67 | 0,368 | 0 | 1 |
| Elovl5   | 0 | 0,43 | 0,84 | 0,657 | 0 | 1 |
| Camk2b   | 0 | 0,43 | 1    | 0,992 | 0 | 1 |
| Creb3l2  | 0 | 0,43 | 1    | 0,998 | 0 | 1 |
| Plec     | 0 | 0,42 | 0,97 | 0,948 | 0 | 1 |
| Ptpn13   | 0 | 0,42 | 0,95 | 0,861 | 0 | 1 |
| Aak1     | 0 | 0,42 | 0,98 | 0,926 | 0 | 1 |
| Mef2c    | 0 | 0,42 | 1    | 0,99  | 0 | 1 |
| S100a16  | 0 | 0,42 | 0,98 | 0,962 | 0 | 1 |
| Ano8     | 0 | 0,42 | 0,68 | 0,351 | 0 | 1 |
| Timp3    | 0 | 0,42 | 0,88 | 0,78  | 0 | 1 |
| Aldh1a3  | 0 | 0,42 | 0,53 | 0,187 | 0 | 1 |
| Prnp     | 0 | 0,41 | 0,99 | 0,981 | 0 | 1 |
| Fabp7    | 0 | 0,41 | 0,68 | 0,385 | 0 | 1 |
| Klh13    | 0 | 0,41 | 0,73 | 0,499 | 0 | 1 |
| Lypd6    | 0 | 0,41 | 0,61 | 0,243 | 0 | 1 |
| Neto2    | 0 | 0,4  | 0,6  | 0,226 | 0 | 1 |
| Fam89a   | 0 | 0,4  | 0,66 | 0,345 | 0 | 1 |
| Cd38     | 0 | 0,4  | 0,85 | 0,727 | 0 | 1 |
| Sh3bp5   | 0 | 0,4  | 0,52 | 0,159 | 0 | 1 |
| Fam212b  | 0 | 0,4  | 0,74 | 0,496 | 0 | 1 |
| Pam      | 0 | 0,4  | 0,94 | 0,864 | 0 | 1 |
| Xylt1    | 0 | 0,4  | 0,98 | 0,959 | 0 | 1 |
| Zcchc24  | 0 | 0,4  | 0,93 | 0,843 | 0 | 1 |
| Vim      | 0 | 0,4  | 1    | 1     | 0 | 1 |
| Olfml3   | 0 | 0,4  | 0,61 | 0,276 | 0 | 1 |
| Phlda3   | 0 | 0,39 | 0,98 | 0,951 | 0 | 1 |
| Dennd2a  | 0 | 0,39 | 0,98 | 0,964 | 0 | 1 |
| Antxr1   | 0 | 0,39 | 0,64 | 0,295 | 0 | 1 |
| Cd59a    | 0 | 0,39 | 0,99 | 0,984 | 0 | 1 |
| Gfra2    | 0 | 0,39 | 0,37 | 0,068 | 0 | 1 |
| Nkd2     | 0 | 0,39 | 0,77 | 0,468 | 0 | 1 |
| Cdkn1a   | 0 | 0,38 | 0,98 | 0,943 | 0 | 1 |
| Dlgap1   | 0 | 0,38 | 0,66 | 0,314 | 0 | 1 |



|          |   |      |      |       |   |   |
|----------|---|------|------|-------|---|---|
| Tppp3    | 0 | 0,38 | 0,61 | 0,298 | 0 | 1 |
| Cyb5r3   | 0 | 0,38 | 1    | 0,985 | 0 | 1 |
| Mdfic    | 0 | 0,38 | 0,63 | 0,286 | 0 | 1 |
| Rnd3     | 0 | 0,38 | 0,58 | 0,266 | 0 | 1 |
| Tmem26   | 0 | 0,37 | 0,48 | 0,151 | 0 | 1 |
| Hip1     | 0 | 0,37 | 1    | 0,979 | 0 | 1 |
| Dap      | 0 | 0,37 | 0,96 | 0,933 | 0 | 1 |
| Dag1     | 0 | 0,37 | 1    | 0,994 | 0 | 1 |
| Arpc1b   | 0 | 0,37 | 1    | 0,998 | 0 | 1 |
| Pdgfa    | 0 | 0,37 | 0,96 | 0,887 | 0 | 1 |
| Stard8   | 0 | 0,37 | 0,72 | 0,435 | 0 | 1 |
| Cpe      | 0 | 0,37 | 1    | 1     | 0 | 1 |
| Calu     | 0 | 0,37 | 1    | 0,988 | 0 | 1 |
| Tead2    | 0 | 0,36 | 0,65 | 0,307 | 0 | 1 |
| Spata13  | 0 | 0,36 | 0,7  | 0,38  | 0 | 1 |
| Rhoj     | 0 | 0,36 | 0,96 | 0,913 | 0 | 1 |
| Casc4    | 0 | 0,36 | 0,96 | 0,939 | 0 | 1 |
| Ehd1     | 0 | 0,36 | 0,99 | 0,971 | 0 | 1 |
| Samd4    | 0 | 0,36 | 0,87 | 0,734 | 0 | 1 |
| Tbx3os1  | 0 | 0,35 | 0,5  | 0,169 | 0 | 1 |
| Tcaf1    | 0 | 0,35 | 1    | 1     | 0 | 1 |
| Tlr3     | 0 | 0,35 | 0,66 | 0,353 | 0 | 1 |
| Insr     | 0 | 0,35 | 0,94 | 0,875 | 0 | 1 |
| Hk1      | 0 | 0,35 | 0,99 | 0,984 | 0 | 1 |
| Adam12   | 0 | 0,35 | 0,87 | 0,662 | 0 | 1 |
| Nudt4    | 0 | 0,35 | 0,99 | 0,979 | 0 | 1 |
| Orai1    | 0 | 0,34 | 0,91 | 0,856 | 0 | 1 |
| Fkbp5    | 0 | 0,34 | 0,69 | 0,409 | 0 | 1 |
| Gab2     | 0 | 0,34 | 0,71 | 0,4   | 0 | 1 |
| Ppp1r18  | 0 | 0,34 | 0,92 | 0,867 | 0 | 1 |
| Gpr155   | 0 | 0,34 | 0,62 | 0,292 | 0 | 1 |
| Itgav    | 0 | 0,34 | 0,99 | 0,975 | 0 | 1 |
| Calm2    | 0 | 0,34 | 1    | 1     | 0 | 1 |
| Pls3     | 0 | 0,33 | 0,61 | 0,291 | 0 | 1 |
| Ubash3b  | 0 | 0,33 | 0,61 | 0,276 | 0 | 1 |
| Scn1b    | 0 | 0,33 | 1    | 1     | 0 | 1 |
| Plcb1    | 0 | 0,33 | 0,53 | 0,191 | 0 | 1 |
| Fgfr1    | 0 | 0,33 | 0,54 | 0,236 | 0 | 1 |
| Tmem82   | 0 | 0,32 | 0,51 | 0,191 | 0 | 1 |
| Nes      | 0 | 0,32 | 0,77 | 0,576 | 0 | 1 |
| Fkbp14   | 0 | 0,32 | 0,62 | 0,303 | 0 | 1 |
| Cdc42bpa | 0 | 0,32 | 0,97 | 0,93  | 0 | 1 |
| Fgd6     | 0 | 0,32 | 0,63 | 0,304 | 0 | 1 |
| Net1     | 0 | 0,32 | 0,52 | 0,224 | 0 | 1 |
| Nmnat2   | 0 | 0,32 | 0,59 | 0,269 | 0 | 1 |
| Arhgef9  | 0 | 0,32 | 0,46 | 0,152 | 0 | 1 |

|            |           |      |      |       |           |   |
|------------|-----------|------|------|-------|-----------|---|
| Lrrc58     | 0         | 0,32 | 0,99 | 0,992 | 0         | 1 |
| Svil       | 0         | 0,32 | 0,62 | 0,301 | 0         | 1 |
| Ggta1      | 0         | 0,32 | 0,63 | 0,305 | 0         | 1 |
| Lmo4       | 0         | 0,32 | 1    | 0,997 | 0         | 1 |
| Sh3rf1     | 0         | 0,32 | 0,6  | 0,284 | 0         | 1 |
| Shf        | 0         | 0,31 | 0,51 | 0,223 | 0         | 1 |
| Plekhb1    | 0         | 0,31 | 1    | 0,99  | 0         | 1 |
| Nf1        | 0         | 0,31 | 0,97 | 0,928 | 0         | 1 |
| Rftn2      | 0         | 0,31 | 0,6  | 0,288 | 0         | 1 |
| Rims1      | 0         | 0,31 | 0,39 | 0,094 | 0         | 1 |
| Atp6v0e    | 0         | 0,3  | 1    | 0,999 | 0         | 1 |
| Tnfaip8    | 2,09E-307 | 0,34 | 0,67 | 0,38  | 3,72E-303 | 1 |
| Pcdh9      | 2,24E-306 | 0,36 | 0,84 | 0,666 | 3,99E-302 | 1 |
| Cask       | 4,56E-306 | 0,32 | 0,68 | 0,391 | 8,12E-302 | 1 |
| Cavin3     | 5,83E-306 | 0,42 | 0,79 | 0,635 | 1,04E-301 | 1 |
| Mmp15      | 1,28E-305 | 0,33 | 0,87 | 0,746 | 2,28E-301 | 1 |
| Smtn       | 4,24E-305 | 0,36 | 0,79 | 0,574 | 7,55E-301 | 1 |
| Abcg1      | 1,68E-303 | 0,33 | 0,94 | 0,901 | 3,00E-299 | 1 |
| Tmx4       | 3,65E-303 | 0,33 | 0,93 | 0,868 | 6,49E-299 | 1 |
| 700025G04R | 5,83E-299 | 0,36 | 0,71 | 0,452 | 1,04E-294 | 1 |
| Hs2st1     | 3,73E-296 | 0,3  | 0,94 | 0,883 | 6,64E-292 | 1 |
| Nck2       | 5,12E-295 | 0,3  | 0,63 | 0,323 | 9,12E-291 | 1 |
| Ptprz1     | 1,68E-294 | 0,41 | 0,89 | 0,824 | 2,99E-290 | 1 |
| Ints3      | 1,67E-293 | 0,53 | 0,73 | 0,524 | 2,97E-289 | 1 |
| Mfge8      | 4,90E-292 | 0,38 | 1    | 0,997 | 8,73E-288 | 1 |
| Me1        | 1,46E-289 | 0,35 | 0,82 | 0,665 | 2,60E-285 | 1 |
| Tmem176a   | 1,83E-286 | 0,31 | 1    | 0,996 | 3,26E-282 | 1 |
| Arl5a      | 7,37E-286 | 0,31 | 0,92 | 0,884 | 1,31E-281 | 1 |
| Epdr1      | 5,75E-285 | 0,33 | 0,85 | 0,751 | 1,02E-280 | 1 |
| Rcn3       | 1,55E-283 | 0,38 | 0,89 | 0,818 | 2,77E-279 | 1 |
| Cmtm5      | 2,44E-283 | 0,34 | 0,94 | 0,912 | 4,34E-279 | 1 |
| Kcna2      | 8,34E-283 | 0,32 | 0,88 | 0,779 | 1,49E-278 | 1 |
| Alcam      | 8,32E-282 | 0,43 | 0,98 | 0,963 | 1,48E-277 | 1 |
| Psd3       | 4,80E-281 | 0,33 | 0,82 | 0,624 | 8,55E-277 | 1 |
| Adk        | 5,30E-279 | 0,31 | 0,91 | 0,817 | 9,44E-275 | 1 |
| Sema3e     | 2,94E-275 | 0,36 | 0,61 | 0,327 | 5,23E-271 | 1 |
| Amotl1     | 2,84E-273 | 0,35 | 0,99 | 0,983 | 5,06E-269 | 1 |
| Pxdn       | 1,36E-272 | 0,32 | 0,77 | 0,552 | 2,42E-268 | 1 |
| Sema6d     | 1,78E-272 | 0,42 | 0,6  | 0,331 | 3,16E-268 | 1 |
| 931406C07R | 7,78E-272 | 0,34 | 1    | 0,99  | 1,38E-267 | 1 |
| Cnp        | 2,02E-270 | 0,31 | 0,83 | 0,696 | 3,60E-266 | 1 |
| Fbln2      | 1,11E-268 | 0,44 | 0,94 | 0,912 | 1,98E-264 | 1 |
| Hbegf      | 1,89E-264 | 0,33 | 0,57 | 0,289 | 3,37E-260 | 1 |
| Sdc2       | 1,67E-262 | 0,33 | 0,6  | 0,317 | 2,98E-258 | 1 |
| Mtus1      | 6,02E-258 | 0,34 | 0,74 | 0,525 | 1,07E-253 | 1 |
| Ppm1f      | 8,78E-257 | 0,33 | 0,77 | 0,578 | 1,56E-252 | 1 |

|            |           |      |      |       |           |   |
|------------|-----------|------|------|-------|-----------|---|
| Stim1      | 1,79E-254 | 0,3  | 0,85 | 0,721 | 3,19E-250 | 1 |
| Fstl1      | 2,07E-254 | 0,31 | 0,71 | 0,47  | 3,69E-250 | 1 |
| Cpd        | 3,92E-254 | 0,31 | 0,92 | 0,88  | 6,98E-250 | 1 |
| S1pr3      | 8,93E-250 | 0,38 | 0,73 | 0,54  | 1,59E-245 | 1 |
| Hhla1      | 3,35E-247 | 0,36 | 0,46 | 0,209 | 5,96E-243 | 1 |
| Cp         | 2,88E-244 | 0,37 | 0,7  | 0,477 | 5,13E-240 | 1 |
| Maged2     | 2,20E-243 | 0,3  | 0,87 | 0,804 | 3,92E-239 | 1 |
| Nr4a2      | 8,27E-243 | 0,36 | 0,51 | 0,248 | 1,47E-238 | 1 |
| Bmp1       | 3,92E-241 | 0,31 | 0,59 | 0,316 | 6,97E-237 | 1 |
| St3gal2    | 1,21E-240 | 0,32 | 0,87 | 0,777 | 2,16E-236 | 1 |
| Pik3r1     | 2,08E-238 | 0,31 | 0,78 | 0,61  | 3,71E-234 | 1 |
| Lgr4       | 1,86E-237 | 0,32 | 0,7  | 0,464 | 3,32E-233 | 1 |
| Chst11     | 4,48E-227 | 0,35 | 0,74 | 0,557 | 7,98E-223 | 1 |
| Ybx3       | 2,13E-223 | 0,44 | 0,81 | 0,737 | 3,79E-219 | 1 |
| Tmc6       | 5,25E-215 | 0,31 | 0,91 | 0,864 | 9,35E-211 | 1 |
| Thbs2      | 2,11E-207 | 0,36 | 0,45 | 0,219 | 3,75E-203 | 1 |
| Pim3       | 3,90E-205 | 0,35 | 0,62 | 0,39  | 6,94E-201 | 1 |
| Plat       | 1,27E-203 | 0,31 | 0,95 | 0,94  | 2,27E-199 | 1 |
| Sh2b3      | 1,18E-195 | 0,3  | 0,81 | 0,714 | 2,10E-191 | 1 |
| Nfatc2     | 5,24E-189 | 0,36 | 0,94 | 0,922 | 9,33E-185 | 1 |
| Cfh        | 7,83E-166 | 0,32 | 0,39 | 0,192 | 1,39E-161 | 1 |
| Ptn        | 6,03E-164 | 0,68 | 0,86 | 0,868 | 1,07E-159 | 1 |
| Mt3        | 8,32E-158 | 0,33 | 0,46 | 0,249 | 1,48E-153 | 1 |
| Flrt3      | 2,68E-157 | 0,32 | 0,69 | 0,528 | 4,77E-153 | 1 |
| Egr1       | 5,14E-157 | 0,34 | 0,97 | 0,958 | 9,15E-153 | 1 |
| Fos        | 9,44E-153 | 0,43 | 0,96 | 0,975 | 1,68E-148 | 1 |
| S100a10    | 6,19E-152 | 0,3  | 0,95 | 0,952 | 1,10E-147 | 1 |
| Apold1     | 7,25E-127 | 0,33 | 0,86 | 0,858 | 1,29E-122 | 1 |
| Fez1       | 1,83E-123 | 0,3  | 0,79 | 0,765 | 3,25E-119 | 1 |
| Klf2       | 2,00E-115 | 0,53 | 0,65 | 0,577 | 3,56E-111 | 1 |
| Ier2       | 2,53E-89  | 0,3  | 0,88 | 0,889 | 4,51E-85  | 1 |
| Kcnma1     | 1,22E-74  | 0,3  | 0,93 | 0,925 | 2,17E-70  | 1 |
| Hmgcs1     | 1,66E-74  | 0,34 | 0,71 | 0,647 | 2,96E-70  | 1 |
| Zfp36      | 3,47E-61  | 0,39 | 0,73 | 0,74  | 6,18E-57  | 1 |
| Luc7l2     | 0         | 1,23 | 1    | 1     | 0         | 2 |
| Xist       | 0         | 1,03 | 1    | 0,994 | 0         | 2 |
| AC149090.1 | 0         | 1    | 1    | 0,999 | 0         | 2 |
| Mkn1       | 0         | 0,91 | 1    | 1     | 0         | 2 |
| Fus        | 0         | 0,9  | 1    | 0,998 | 0         | 2 |
| Kcnq1ot1   | 0         | 0,87 | 1    | 0,923 | 0         | 2 |
| Gm26699    | 0         | 0,87 | 0,96 | 0,715 | 0         | 2 |
| Taf1d      | 0         | 0,85 | 1    | 0,975 | 0         | 2 |
| Ubn2       | 0         | 0,84 | 1    | 0,998 | 0         | 2 |
| Ogt        | 0         | 0,79 | 1    | 0,925 | 0         | 2 |
| Lncpint    | 0         | 0,79 | 1    | 0,991 | 0         | 2 |
| Neat1      | 0         | 0,79 | 1    | 0,994 | 0         | 2 |

|         |           |      |      |       |           |   |
|---------|-----------|------|------|-------|-----------|---|
| Nktr    | 0         | 0,79 | 1    | 0,996 | 0         | 2 |
| Nfat5   | 0         | 0,78 | 1    | 0,96  | 0         | 2 |
| Rapgef4 | 0         | 0,75 | 1    | 0,978 | 0         | 2 |
| Malat1  | 0         | 0,74 | 1    | 1     | 0         | 2 |
| Son     | 0         | 0,74 | 1    | 1     | 0         | 2 |
| Fbxl7   | 0         | 0,7  | 1    | 0,983 | 0         | 2 |
| Mertk   | 0         | 0,69 | 1    | 0,94  | 0         | 2 |
| Rsrp1   | 0         | 0,68 | 1    | 0,938 | 0         | 2 |
| Sec14l5 | 0         | 0,68 | 0,95 | 0,713 | 0         | 2 |
| Nav1    | 0         | 0,68 | 1    | 0,98  | 0         | 2 |
| Ttc14   | 0         | 0,67 | 1    | 0,932 | 0         | 2 |
| Tsix    | 0         | 0,67 | 0,83 | 0,581 | 0         | 2 |
| Pax3    | 0         | 0,67 | 1    | 0,934 | 0         | 2 |
| Nav2    | 0         | 0,67 | 1    | 0,911 | 0         | 2 |
| Zc3h7a  | 0         | 0,66 | 0,97 | 0,75  | 0         | 2 |
| Arglu1  | 0         | 0,65 | 1    | 0,957 | 0         | 2 |
| Pnlsr   | 0         | 0,63 | 1    | 0,969 | 0         | 2 |
| Ddx17   | 0         | 0,63 | 1    | 0,975 | 0         | 2 |
| Rapgef3 | 0         | 0,62 | 0,97 | 0,721 | 0         | 2 |
| Rbm25   | 0         | 0,61 | 1    | 0,991 | 0         | 2 |
| Krit1   | 0         | 0,61 | 1    | 0,894 | 0         | 2 |
| Tra2a   | 0         | 0,6  | 1    | 0,983 | 0         | 2 |
| Gm26917 | 0         | 0,6  | 0,99 | 0,823 | 0         | 2 |
| Tia1    | 0         | 0,59 | 1    | 0,894 | 0         | 2 |
| Sfpq    | 0         | 0,58 | 1    | 0,96  | 0         | 2 |
| Snrnp70 | 0         | 0,58 | 1    | 0,979 | 0         | 2 |
| Nisch   | 0         | 0,58 | 1    | 0,983 | 0         | 2 |
| Tecpr1  | 0         | 0,57 | 1    | 0,995 | 0         | 2 |
| Tnpo3   | 0         | 0,56 | 1    | 0,995 | 0         | 2 |
| Cnot4   | 0         | 0,52 | 1    | 0,982 | 0         | 2 |
| Srrm2   | 0         | 0,5  | 1    | 1     | 0         | 2 |
| Apod    | 0         | 0,48 | 1    | 0,974 | 0         | 2 |
| Zbtb20  | 0         | 0,45 | 1    | 1     | 0         | 2 |
| Ccnl1   | 2,72E-306 | 0,7  | 1    | 0,919 | 4,84E-302 | 2 |
| Ccnl2   | 5,91E-301 | 0,58 | 0,89 | 0,644 | 1,05E-296 | 2 |
| Cpsf6   | 1,97E-298 | 0,6  | 1    | 0,874 | 3,50E-294 | 2 |
| Zcchc7  | 3,67E-297 | 0,58 | 0,98 | 0,777 | 6,54E-293 | 2 |
| Dst     | 7,69E-291 | 0,52 | 1    | 0,999 | 1,37E-286 | 2 |
| Ube2d3  | 1,41E-289 | 0,59 | 1    | 0,989 | 2,51E-285 | 2 |
| Fubp1   | 1,44E-287 | 0,53 | 1    | 0,956 | 2,57E-283 | 2 |
| Cspp1   | 3,53E-287 | 0,59 | 0,98 | 0,753 | 6,28E-283 | 2 |
| Etl4    | 3,54E-285 | 0,52 | 1    | 0,979 | 6,31E-281 | 2 |
| Phc3    | 2,11E-283 | 0,53 | 1    | 0,944 | 3,76E-279 | 2 |
| Etv1    | 1,36E-279 | 0,44 | 1    | 0,998 | 2,41E-275 | 2 |
| Sorbs1  | 7,26E-276 | 0,53 | 1    | 0,979 | 1,29E-271 | 2 |
| Ank3    | 2,56E-273 | 0,55 | 1    | 0,954 | 4,56E-269 | 2 |

|             |           |      |      |       |           |   |
|-------------|-----------|------|------|-------|-----------|---|
| Setd5       | 5,03E-269 | 0,54 | 1    | 0,961 | 8,95E-265 | 2 |
| Tet2        | 6,34E-269 | 0,57 | 0,92 | 0,675 | 1,13E-264 | 2 |
| Stox2       | 3,58E-267 | 0,52 | 1    | 0,929 | 6,38E-263 | 2 |
| Ewsr1       | 8,84E-264 | 0,54 | 0,99 | 0,843 | 1,57E-259 | 2 |
| Rbm39       | 3,55E-263 | 0,38 | 1    | 0,999 | 6,32E-259 | 2 |
| Psma3       | 1,16E-262 | 0,59 | 1    | 0,996 | 2,07E-258 | 2 |
| Hnrnp1      | 4,87E-257 | 0,56 | 0,98 | 0,803 | 8,68E-253 | 2 |
| Arhgap31    | 3,08E-251 | 0,55 | 1    | 0,983 | 5,48E-247 | 2 |
| Srsf11      | 1,97E-247 | 0,48 | 1    | 0,97  | 3,51E-243 | 2 |
| Atrx        | 2,19E-242 | 0,41 | 1    | 0,997 | 3,91E-238 | 2 |
| Cped1       | 2,79E-237 | 0,49 | 1    | 0,914 | 4,96E-233 | 2 |
| Chka        | 1,26E-234 | 0,67 | 1    | 0,93  | 2,24E-230 | 2 |
| 201011101Ri | 1,00E-231 | 0,51 | 1    | 0,969 | 1,79E-227 | 2 |
| Etnk1       | 4,62E-230 | 0,52 | 1    | 0,984 | 8,23E-226 | 2 |
| Sbno2       | 5,61E-229 | 0,6  | 0,98 | 0,801 | 9,99E-225 | 2 |
| Col3a1      | 2,39E-228 | 0,44 | 0,98 | 0,809 | 4,25E-224 | 2 |
| Mga         | 4,93E-226 | 0,49 | 0,99 | 0,82  | 8,77E-222 | 2 |
| Jmjd1c      | 1,05E-224 | 0,51 | 1    | 0,956 | 1,86E-220 | 2 |
| Rufy3       | 1,20E-222 | 0,55 | 0,99 | 0,857 | 2,14E-218 | 2 |
| BC005561    | 2,74E-218 | 0,51 | 0,88 | 0,627 | 4,88E-214 | 2 |
| 930402H24R  | 1,40E-216 | 0,45 | 1    | 0,946 | 2,49E-212 | 2 |
| Pick1       | 1,24E-214 | 0,63 | 0,88 | 0,612 | 2,21E-210 | 2 |
| Prpf38b     | 5,60E-212 | 0,46 | 1    | 0,921 | 9,97E-208 | 2 |
| Bclaf1      | 1,96E-210 | 0,44 | 1    | 0,99  | 3,49E-206 | 2 |
| Trpm7       | 2,08E-208 | 0,49 | 1    | 0,886 | 3,70E-204 | 2 |
| Mau2        | 2,64E-208 | 0,47 | 0,97 | 0,791 | 4,70E-204 | 2 |
| Smg1        | 4,13E-208 | 0,48 | 0,91 | 0,678 | 7,36E-204 | 2 |
| Pabpn1      | 7,66E-206 | 0,47 | 0,98 | 0,799 | 1,36E-201 | 2 |
| Cdc14a      | 2,68E-203 | 0,53 | 0,98 | 0,79  | 4,77E-199 | 2 |
| Ocrl        | 5,22E-201 | 0,44 | 0,9  | 0,663 | 9,30E-197 | 2 |
| Slc25a36    | 3,34E-200 | 0,47 | 0,86 | 0,646 | 5,95E-196 | 2 |
| Htt         | 6,00E-199 | 0,47 | 0,97 | 0,774 | 1,07E-194 | 2 |
| Iqgap1      | 1,40E-197 | 0,32 | 1    | 1     | 2,49E-193 | 2 |
| Fchsd2      | 2,01E-195 | 0,54 | 0,96 | 0,734 | 3,57E-191 | 2 |
| Srek1       | 2,66E-194 | 0,44 | 0,97 | 0,784 | 4,73E-190 | 2 |
| Clk1        | 4,05E-194 | 0,49 | 0,99 | 0,901 | 7,21E-190 | 2 |
| Mical3      | 6,97E-194 | 0,45 | 1    | 0,966 | 1,24E-189 | 2 |
| Rictor      | 1,60E-193 | 0,47 | 0,99 | 0,871 | 2,85E-189 | 2 |
| Ankrd17     | 5,46E-193 | 0,47 | 1    | 0,953 | 9,72E-189 | 2 |
| Dlc1        | 9,09E-192 | 0,39 | 1    | 0,993 | 1,62E-187 | 2 |
| Asx2        | 1,38E-191 | 0,44 | 0,94 | 0,727 | 2,45E-187 | 2 |
| Tnrc6b      | 3,44E-189 | 0,39 | 1    | 0,987 | 6,12E-185 | 2 |
| Mat2a       | 7,66E-189 | 0,44 | 1    | 0,961 | 1,36E-184 | 2 |
| R3hdm1      | 3,44E-188 | 0,49 | 0,99 | 0,843 | 6,13E-184 | 2 |
| Lyst        | 1,94E-186 | 0,44 | 0,94 | 0,693 | 3,46E-182 | 2 |
| AY036118    | 9,35E-184 | 0,32 | 1    | 0,98  | 1,66E-179 | 2 |

|         |           |      |      |       |           |   |
|---------|-----------|------|------|-------|-----------|---|
| Ccl8    | 4,07E-183 | 0,45 | 0,81 | 0,588 | 7,24E-179 | 2 |
| Gm20619 | 2,40E-181 | 0,44 | 0,91 | 0,649 | 4,27E-177 | 2 |
| Ash1l   | 1,52E-179 | 0,39 | 1    | 0,979 | 2,70E-175 | 2 |
| Ikbkb   | 1,58E-177 | 0,44 | 0,96 | 0,753 | 2,82E-173 | 2 |
| Ddx5    | 1,75E-177 | 0,34 | 1    | 1     | 3,11E-173 | 2 |
| Prpf4b  | 2,61E-175 | 0,41 | 1    | 0,936 | 4,65E-171 | 2 |
| Appl2   | 1,63E-174 | 0,42 | 0,97 | 0,743 | 2,90E-170 | 2 |
| Chd9    | 4,02E-174 | 0,41 | 1    | 0,949 | 7,15E-170 | 2 |
| Pan3    | 8,12E-173 | 0,42 | 0,88 | 0,663 | 1,45E-168 | 2 |
| Mob1b   | 3,33E-169 | 0,44 | 0,98 | 0,818 | 5,93E-165 | 2 |
| Gjc3    | 2,18E-168 | 0,36 | 1    | 0,97  | 3,88E-164 | 2 |
| Rasa2   | 1,21E-167 | 0,46 | 1    | 0,961 | 2,15E-163 | 2 |
| Ppp1r9a | 9,66E-167 | 0,41 | 0,95 | 0,714 | 1,72E-162 | 2 |
| Mdm4    | 1,18E-166 | 0,45 | 0,79 | 0,612 | 2,10E-162 | 2 |
| Polg    | 6,42E-166 | 0,45 | 1    | 0,839 | 1,14E-161 | 2 |
| Ahnak2  | 9,45E-166 | 0,33 | 0,89 | 0,595 | 1,68E-161 | 2 |
| Srsf5   | 2,39E-165 | 0,39 | 1    | 0,975 | 4,25E-161 | 2 |
| Uhrf2   | 2,29E-164 | 0,46 | 0,96 | 0,754 | 4,07E-160 | 2 |
| Prpf39  | 3,32E-163 | 0,43 | 0,8  | 0,601 | 5,92E-159 | 2 |
| Clk4    | 3,75E-163 | 0,41 | 0,89 | 0,67  | 6,68E-159 | 2 |
| Ankrd28 | 4,05E-163 | 0,41 | 0,89 | 0,651 | 7,22E-159 | 2 |
| Nsd2    | 3,10E-162 | 0,43 | 0,98 | 0,785 | 5,53E-158 | 2 |
| Smc5    | 1,18E-161 | 0,45 | 0,78 | 0,595 | 2,11E-157 | 2 |
| Col1a2  | 1,32E-161 | 0,32 | 0,92 | 0,682 | 2,35E-157 | 2 |
| Pds5a   | 7,91E-161 | 0,4  | 0,97 | 0,769 | 1,41E-156 | 2 |
| Phf2011 | 3,64E-160 | 0,39 | 1    | 0,95  | 6,47E-156 | 2 |
| March7  | 5,86E-160 | 0,44 | 1    | 0,906 | 1,04E-155 | 2 |
| Phip    | 1,78E-159 | 0,48 | 1    | 0,908 | 3,17E-155 | 2 |
| Atxn2   | 1,94E-159 | 0,4  | 1    | 0,943 | 3,45E-155 | 2 |
| Hjurp   | 3,00E-159 | 0,41 | 0,94 | 0,707 | 5,34E-155 | 2 |
| Ankrd12 | 9,66E-158 | 0,38 | 1    | 0,956 | 1,72E-153 | 2 |
| Ppp6r3  | 3,09E-157 | 0,39 | 0,96 | 0,761 | 5,51E-153 | 2 |
| Safb2   | 3,06E-156 | 0,43 | 0,98 | 0,817 | 5,44E-152 | 2 |
| Itga4   | 9,72E-156 | 0,4  | 1    | 0,994 | 1,73E-151 | 2 |
| Rbm5    | 1,03E-155 | 0,41 | 0,99 | 0,859 | 1,83E-151 | 2 |
| Zzef1   | 2,49E-155 | 0,4  | 0,88 | 0,663 | 4,44E-151 | 2 |
| Bicd1   | 4,72E-155 | 0,48 | 0,98 | 0,818 | 8,40E-151 | 2 |
| Celf2   | 5,23E-154 | 0,36 | 1    | 0,961 | 9,31E-150 | 2 |
| Gm26518 | 3,47E-152 | 0,53 | 0,69 | 0,533 | 6,18E-148 | 2 |
| Tmcc1   | 5,89E-151 | 0,42 | 0,85 | 0,642 | 1,05E-146 | 2 |
| Tra2b   | 7,02E-151 | 0,45 | 0,99 | 0,924 | 1,25E-146 | 2 |
| Trim24  | 1,24E-150 | 0,41 | 1    | 0,979 | 2,20E-146 | 2 |
| Fam208a | 1,03E-149 | 0,38 | 0,89 | 0,661 | 1,84E-145 | 2 |
| Cdc37l1 | 1,67E-149 | 0,39 | 1    | 0,92  | 2,98E-145 | 2 |
| Akr1b10 | 2,70E-149 | 0,48 | 0,99 | 0,826 | 4,81E-145 | 2 |
| Sltm    | 2,95E-147 | 0,41 | 1    | 0,905 | 5,25E-143 | 2 |

|             |           |      |      |       |           |   |
|-------------|-----------|------|------|-------|-----------|---|
| Plekha5     | 1,49E-146 | 0,42 | 0,98 | 0,816 | 2,64E-142 | 2 |
| Brd8        | 1,10E-145 | 0,38 | 0,98 | 0,827 | 1,96E-141 | 2 |
| Leng8       | 1,50E-144 | 0,42 | 0,76 | 0,593 | 2,67E-140 | 2 |
| Zeb2        | 1,15E-142 | 0,37 | 1    | 0,995 | 2,05E-138 | 2 |
| Emsy        | 7,19E-142 | 0,38 | 0,94 | 0,73  | 1,28E-137 | 2 |
| Sema6a      | 5,61E-137 | 0,41 | 0,98 | 0,807 | 9,98E-133 | 2 |
| Cdip1       | 6,74E-137 | 0,36 | 0,96 | 0,758 | 1,20E-132 | 2 |
| Herc1       | 1,03E-135 | 0,36 | 0,95 | 0,737 | 1,83E-131 | 2 |
| Map4k4      | 3,30E-135 | 0,35 | 1    | 0,982 | 5,87E-131 | 2 |
| 932438A13R1 | 8,24E-135 | 0,35 | 0,91 | 0,691 | 1,47E-130 | 2 |
| Hpgds1      | 1,28E-134 | 0,38 | 0,98 | 0,712 | 2,29E-130 | 2 |
| Ptpns       | 2,01E-134 | 0,35 | 1    | 0,965 | 3,58E-130 | 2 |
| Rbm26       | 3,44E-134 | 0,35 | 0,96 | 0,762 | 6,12E-130 | 2 |
| Setd2       | 1,86E-132 | 0,34 | 0,86 | 0,646 | 3,32E-128 | 2 |
| Fgd4        | 5,24E-130 | 0,41 | 1    | 0,867 | 9,33E-126 | 2 |
| Tmem209     | 9,73E-130 | 0,39 | 1    | 0,915 | 1,73E-125 | 2 |
| Sfswap      | 6,63E-129 | 0,35 | 0,9  | 0,691 | 1,18E-124 | 2 |
| Matr3       | 3,51E-128 | 0,35 | 1    | 0,977 | 6,25E-124 | 2 |
| Celf1       | 3,54E-127 | 0,34 | 1    | 0,949 | 6,31E-123 | 2 |
| Clock       | 4,58E-125 | 0,34 | 0,88 | 0,669 | 8,15E-121 | 2 |
| Camk2d      | 9,14E-125 | 0,41 | 0,99 | 0,936 | 1,63E-120 | 2 |
| Slc38a2     | 9,35E-125 | 0,44 | 1    | 0,934 | 1,66E-120 | 2 |
| Lrp6        | 1,84E-124 | 0,37 | 1    | 0,922 | 3,27E-120 | 2 |
| Zfp292      | 5,76E-123 | 0,33 | 0,95 | 0,727 | 1,03E-118 | 2 |
| Zfp644      | 1,07E-122 | 0,37 | 0,98 | 0,838 | 1,90E-118 | 2 |
| Hnrnpl      | 8,41E-122 | 0,4  | 0,99 | 0,872 | 1,50E-117 | 2 |
| Arl5b       | 1,24E-121 | 0,38 | 0,96 | 0,748 | 2,20E-117 | 2 |
| Zcchc11     | 3,57E-121 | 0,32 | 0,92 | 0,692 | 6,35E-117 | 2 |
| Phkb        | 4,15E-120 | 0,34 | 0,91 | 0,702 | 7,39E-116 | 2 |
| Hmga2       | 2,78E-119 | 0,48 | 1    | 0,954 | 4,96E-115 | 2 |
| Git2        | 4,96E-119 | 0,37 | 0,98 | 0,807 | 8,84E-115 | 2 |
| Zswim8      | 9,54E-119 | 0,33 | 0,92 | 0,724 | 1,70E-114 | 2 |
| Thoc2       | 1,91E-118 | 0,36 | 0,99 | 0,869 | 3,39E-114 | 2 |
| Mitf1       | 2,37E-118 | 0,37 | 1    | 0,913 | 4,22E-114 | 2 |
| Pbx1        | 5,20E-118 | 0,37 | 1    | 0,949 | 9,26E-114 | 2 |
| Nbea        | 5,76E-118 | 0,33 | 0,93 | 0,688 | 1,03E-113 | 2 |
| Tmem87b     | 1,58E-117 | 0,34 | 0,98 | 0,8   | 2,82E-113 | 2 |
| Nbeal1      | 2,75E-117 | 0,36 | 0,82 | 0,623 | 4,90E-113 | 2 |
| 031425E22R1 | 3,57E-117 | 0,35 | 0,82 | 0,618 | 6,36E-113 | 2 |
| Tet3        | 2,47E-116 | 0,33 | 0,88 | 0,671 | 4,40E-112 | 2 |
| Cnot1       | 6,11E-116 | 0,34 | 0,98 | 0,795 | 1,09E-111 | 2 |
| Plekha1     | 1,79E-115 | 0,35 | 0,93 | 0,706 | 3,18E-111 | 2 |
| Ddx3x       | 4,14E-115 | 0,35 | 1    | 0,975 | 7,37E-111 | 2 |
| Spopl       | 4,62E-115 | 0,41 | 0,73 | 0,589 | 8,22E-111 | 2 |
| Tbc1d23     | 5,92E-115 | 0,34 | 0,91 | 0,705 | 1,05E-110 | 2 |
| Dicer1      | 6,27E-115 | 0,33 | 0,83 | 0,64  | 1,12E-110 | 2 |

|            |           |      |      |       |           |   |
|------------|-----------|------|------|-------|-----------|---|
| Tcf4       | 1,26E-114 | 0,32 | 1    | 0,983 | 2,25E-110 | 2 |
| Nsd1       | 3,14E-114 | 0,33 | 0,98 | 0,801 | 5,59E-110 | 2 |
| Fam193a    | 6,00E-114 | 0,34 | 0,97 | 0,798 | 1,07E-109 | 2 |
| Chd6       | 3,08E-113 | 0,34 | 1    | 0,917 | 5,48E-109 | 2 |
| Kmt5b      | 5,12E-113 | 0,34 | 0,97 | 0,785 | 9,11E-109 | 2 |
| Ubap2l     | 1,97E-112 | 0,33 | 1    | 0,983 | 3,50E-108 | 2 |
| Camkk2     | 3,95E-112 | 0,36 | 0,98 | 0,799 | 7,03E-108 | 2 |
| Braf       | 8,70E-112 | 0,35 | 0,98 | 0,83  | 1,55E-107 | 2 |
| Tmem260    | 1,34E-111 | 0,35 | 0,95 | 0,735 | 2,38E-107 | 2 |
| Nup98      | 4,31E-110 | 0,34 | 0,85 | 0,653 | 7,67E-106 | 2 |
| Dmxf1      | 2,06E-109 | 0,33 | 0,93 | 0,718 | 3,67E-105 | 2 |
| Fmn1       | 2,72E-109 | 0,31 | 1    | 0,929 | 4,85E-105 | 2 |
| Zmym5      | 3,02E-109 | 0,33 | 0,93 | 0,718 | 5,37E-105 | 2 |
| Cpeb4      | 1,21E-108 | 0,32 | 0,96 | 0,753 | 2,16E-104 | 2 |
| Tef        | 2,23E-108 | 0,34 | 1    | 0,854 | 3,97E-104 | 2 |
| Pikfyve    | 3,28E-108 | 0,35 | 0,97 | 0,767 | 5,84E-104 | 2 |
| Atp6v1b2   | 3,13E-107 | 0,39 | 1    | 0,923 | 5,58E-103 | 2 |
| Srsf3      | 1,92E-106 | 0,31 | 1    | 0,954 | 3,41E-102 | 2 |
| Mcc        | 2,47E-106 | 0,3  | 1    | 0,989 | 4,39E-102 | 2 |
| Pde11a     | 5,58E-106 | 0,3  | 0,93 | 0,669 | 9,94E-102 | 2 |
| Maml3      | 1,11E-105 | 0,33 | 0,82 | 0,629 | 1,97E-101 | 2 |
| Cttnbp2    | 5,55E-105 | 0,35 | 0,98 | 0,801 | 9,87E-101 | 2 |
| Kdm2a      | 6,43E-105 | 0,34 | 0,99 | 0,869 | 1,14E-100 | 2 |
| Nrip1      | 7,97E-105 | 0,39 | 1    | 0,99  | 1,42E-100 | 2 |
| Zfhx4      | 8,65E-105 | 0,37 | 0,99 | 0,873 | 1,54E-100 | 2 |
| Ankrd10    | 1,92E-104 | 0,34 | 0,78 | 0,62  | 3,42E-100 | 2 |
| Zfp445     | 1,60E-103 | 0,36 | 0,77 | 0,612 | 2,85E-99  | 2 |
| Ivns1abp   | 2,17E-103 | 0,35 | 0,99 | 0,886 | 3,86E-99  | 2 |
| Rbm6       | 2,89E-103 | 0,31 | 0,86 | 0,679 | 5,15E-99  | 2 |
| Birc6      | 4,91E-103 | 0,3  | 1    | 0,953 | 8,74E-99  | 2 |
| Gcn1l1     | 6,52E-103 | 0,32 | 0,89 | 0,685 | 1,16E-98  | 2 |
| AI314180   | 6,68E-103 | 0,32 | 0,87 | 0,677 | 1,19E-98  | 2 |
| Tnik       | 9,45E-103 | 0,38 | 0,99 | 0,888 | 1,68E-98  | 2 |
| Gpatch8    | 1,59E-102 | 0,35 | 1    | 0,888 | 2,83E-98  | 2 |
| Agk        | 3,14E-102 | 0,4  | 0,7  | 0,561 | 5,59E-98  | 2 |
| Ccnt2      | 4,72E-101 | 0,44 | 0,62 | 0,534 | 8,40E-97  | 2 |
| Pcnx       | 2,17E-100 | 0,36 | 0,98 | 0,805 | 3,87E-96  | 2 |
| Trps1      | 9,15E-100 | 0,36 | 0,98 | 0,831 | 1,63E-95  | 2 |
| Pcgf5      | 1,25E-99  | 0,31 | 0,94 | 0,718 | 2,23E-95  | 2 |
| Nsd3       | 1,92E-99  | 0,35 | 0,99 | 0,906 | 3,41E-95  | 2 |
| Strn3      | 2,76E-99  | 0,32 | 0,97 | 0,807 | 4,92E-95  | 2 |
| Dennd1b    | 3,26E-97  | 0,3  | 0,95 | 0,741 | 5,80E-93  | 2 |
| Pcf11      | 3,68E-97  | 0,37 | 0,74 | 0,586 | 6,55E-93  | 2 |
| D5ErtD579e | 2,22E-96  | 0,31 | 0,87 | 0,668 | 3,95E-92  | 2 |
| 810474O19R | 2,98E-96  | 0,35 | 0,97 | 0,784 | 5,31E-92  | 2 |
| Dcn        | 8,33E-95  | 0,32 | 0,64 | 0,535 | 1,48E-90  | 2 |



|           |          |      |      |       |          |   |
|-----------|----------|------|------|-------|----------|---|
| Plpbp     | 1,99E-94 | 0,31 | 0,94 | 0,716 | 3,55E-90 | 2 |
| Ddhd1     | 6,75E-93 | 0,3  | 0,92 | 0,7   | 1,20E-88 | 2 |
| Ccnt1     | 1,23E-92 | 0,3  | 0,93 | 0,723 | 2,18E-88 | 2 |
| Kmt2c     | 4,99E-92 | 0,34 | 0,99 | 0,88  | 8,88E-88 | 2 |
| Gls       | 7,36E-92 | 0,3  | 0,89 | 0,671 | 1,31E-87 | 2 |
| Mllt10    | 7,85E-92 | 0,32 | 0,79 | 0,635 | 1,40E-87 | 2 |
| Npc1      | 1,42E-91 | 0,33 | 0,98 | 0,818 | 2,52E-87 | 2 |
| Sbf2      | 3,49E-91 | 0,31 | 0,96 | 0,777 | 6,21E-87 | 2 |
| Usp53     | 1,34E-89 | 0,35 | 0,75 | 0,597 | 2,38E-85 | 2 |
| Itch      | 1,49E-89 | 0,31 | 0,98 | 0,831 | 2,65E-85 | 2 |
| Sbno1     | 2,00E-89 | 0,32 | 0,99 | 0,893 | 3,55E-85 | 2 |
| Gria3     | 9,96E-88 | 0,32 | 0,96 | 0,745 | 1,77E-83 | 2 |
| Trmt1     | 2,64E-87 | 0,32 | 0,75 | 0,613 | 4,70E-83 | 2 |
| Tardbp    | 2,94E-86 | 0,3  | 0,98 | 0,816 | 5,23E-82 | 2 |
| Rb1cc1    | 2,42E-85 | 0,33 | 0,98 | 0,82  | 4,31E-81 | 2 |
| Akap8l    | 2,55E-85 | 0,35 | 0,71 | 0,588 | 4,53E-81 | 2 |
| Brwd1     | 3,85E-84 | 0,34 | 0,7  | 0,585 | 6,85E-80 | 2 |
| Nfkbiz    | 9,40E-84 | 0,32 | 0,91 | 0,655 | 1,67E-79 | 2 |
| Usp24     | 7,96E-83 | 0,37 | 0,99 | 0,864 | 1,42E-78 | 2 |
| Zfp638    | 3,21E-82 | 0,31 | 0,99 | 0,872 | 5,71E-78 | 2 |
| Cuedc1    | 7,16E-81 | 0,33 | 0,72 | 0,59  | 1,28E-76 | 2 |
| Kdm5a     | 1,43E-80 | 0,31 | 0,99 | 0,856 | 2,55E-76 | 2 |
| Rc3h2     | 4,48E-80 | 0,31 | 0,99 | 0,87  | 7,97E-76 | 2 |
| Bcl2      | 2,13E-79 | 0,33 | 0,99 | 0,855 | 3,80E-75 | 2 |
| Cdc42bpa1 | 2,58E-79 | 0,31 | 1    | 0,935 | 4,58E-75 | 2 |
| Eya1      | 4,34E-79 | 0,33 | 0,73 | 0,578 | 7,73E-75 | 2 |
| Tsc22d2   | 5,39E-79 | 0,31 | 0,97 | 0,799 | 9,59E-75 | 2 |
| Dnmt3a    | 6,17E-79 | 0,34 | 0,72 | 0,592 | 1,10E-74 | 2 |
| Mmp161    | 1,20E-78 | 0,33 | 1    | 0,894 | 2,14E-74 | 2 |
| Tead1     | 1,01E-77 | 0,31 | 1    | 0,921 | 1,81E-73 | 2 |
| Frmd4a    | 1,52E-77 | 0,32 | 0,98 | 0,786 | 2,70E-73 | 2 |
| Rbpms     | 1,99E-77 | 0,36 | 0,99 | 0,913 | 3,54E-73 | 2 |
| Gm37494   | 2,20E-77 | 0,35 | 0,68 | 0,562 | 3,92E-73 | 2 |
| Csnk1g1   | 6,90E-76 | 0,3  | 0,75 | 0,575 | 1,23E-71 | 2 |
| Mark3     | 1,04E-74 | 0,33 | 0,99 | 0,862 | 1,86E-70 | 2 |
| Fam120b   | 2,74E-74 | 0,3  | 0,73 | 0,606 | 4,88E-70 | 2 |
| Lama4     | 1,41E-73 | 0,32 | 0,98 | 0,832 | 2,51E-69 | 2 |
| Paxbp1    | 2,36E-71 | 0,33 | 0,64 | 0,559 | 4,21E-67 | 2 |
| Mapk8     | 6,56E-62 | 0,34 | 0,64 | 0,564 | 1,17E-57 | 2 |
| Stk38     | 3,50E-61 | 0,35 | 0,59 | 0,538 | 6,23E-57 | 2 |
| Apaf1     | 1,06E-58 | 0,34 | 0,66 | 0,554 | 1,88E-54 | 2 |
| Atat1     | 4,69E-56 | 0,35 | 0,59 | 0,54  | 8,35E-52 | 2 |
| Zkscan3   | 2,39E-55 | 0,32 | 0,67 | 0,581 | 4,26E-51 | 2 |
| Gm26532   | 3,88E-52 | 0,44 | 0,98 | 0,777 | 6,91E-48 | 2 |
| Nrbp2     | 5,20E-50 | 0,45 | 0,47 | 0,438 | 9,26E-46 | 2 |
| Pde4d     | 1,58E-48 | 0,34 | 0,58 | 0,539 | 2,81E-44 | 2 |

|             |          |      |      |       |          |   |
|-------------|----------|------|------|-------|----------|---|
| Fosb        | 3,98E-40 | 0,54 | 0,99 | 0,907 | 7,09E-36 | 2 |
| Mbtd1       | 7,10E-39 | 0,32 | 0,54 | 0,524 | 1,26E-34 | 2 |
| Mdm2        | 3,59E-38 | 0,37 | 0,98 | 0,791 | 6,38E-34 | 2 |
| 530011L22R1 | 3,79E-35 | 0,39 | 0,39 | 0,36  | 6,75E-31 | 2 |
| 810403A07R1 | 8,89E-32 | 0,35 | 0,47 | 0,476 | 1,58E-27 | 2 |
| Pcdhb19     | 2,78E-22 | 0,36 | 0,36 | 0,343 | 4,95E-18 | 2 |
| Ptbp2       | 3,43E-21 | 0,3  | 0,45 | 0,488 | 6,11E-17 | 2 |
| Pigm        | 3,13E-18 | 0,4  | 0,39 | 0,408 | 5,57E-14 | 2 |
| Wsb1        | 2,27E-12 | 0,31 | 0,4  | 0,441 | 4,04E-08 | 2 |
| Snhg11      | 6,31E-12 | 0,32 | 0,39 | 0,415 | 1,12E-07 | 2 |
| Slc22a15    | 5,36E-11 | 0,32 | 0,43 | 0,468 | 9,54E-07 | 2 |
| Igfp1       | 0        | 2,57 | 0,86 | 0,15  | 0        | 3 |
| Gbp4        | 0        | 2,41 | 0,84 | 0,141 | 0        | 3 |
| Gbp2        | 0        | 2,26 | 0,92 | 0,324 | 0        | 3 |
| Cxcl10      | 0        | 1,92 | 0,45 | 0,088 | 0        | 3 |
| Igtp        | 0        | 1,58 | 0,85 | 0,194 | 0        | 3 |
| Ifit3       | 0        | 1,56 | 0,85 | 0,341 | 0        | 3 |
| Gbp3        | 0        | 1,48 | 0,89 | 0,302 | 0        | 3 |
| Psmb8       | 0        | 1,47 | 0,94 | 0,43  | 0        | 3 |
| Stat1       | 0        | 1,44 | 0,99 | 0,604 | 0        | 3 |
| H2-K1       | 0        | 1,41 | 0,99 | 0,959 | 0        | 3 |
| Ifi47       | 0        | 1,41 | 0,87 | 0,263 | 0        | 3 |
| Gm4951      | 0        | 1,39 | 0,79 | 0,066 | 0        | 3 |
| Ifit1       | 0        | 1,37 | 0,55 | 0,13  | 0        | 3 |
| H2-Q7       | 0        | 1,35 | 0,89 | 0,565 | 0        | 3 |
| H2-T23      | 0        | 1,3  | 0,83 | 0,304 | 0        | 3 |
| Irgm1       | 0        | 1,27 | 0,93 | 0,449 | 0        | 3 |
| 830016B08R1 | 0        | 1,19 | 0,71 | 0,053 | 0        | 3 |
| Parp12      | 0        | 1,1  | 0,96 | 0,703 | 0        | 3 |
| Isg15       | 0        | 1,1  | 0,56 | 0,107 | 0        | 3 |
| Bst2        | 0        | 1,08 | 0,98 | 0,847 | 0        | 3 |
| Oasl2       | 0        | 1,08 | 0,68 | 0,082 | 0        | 3 |
| Psmb10      | 0        | 1,04 | 0,89 | 0,534 | 0        | 3 |
| Tgtp2       | 0        | 1    | 0,68 | 0,09  | 0        | 3 |
| H2-Q4       | 0        | 1    | 0,84 | 0,299 | 0        | 3 |
| Parp14      | 0        | 0,99 | 0,74 | 0,233 | 0        | 3 |
| Tmem140     | 0        | 0,98 | 0,92 | 0,63  | 0        | 3 |
| Psmb9       | 0        | 0,96 | 0,79 | 0,249 | 0        | 3 |
| Cd274       | 0        | 0,95 | 0,61 | 0,146 | 0        | 3 |
| Gbp6        | 0        | 0,95 | 0,64 | 0,062 | 0        | 3 |
| H2-D1       | 0        | 0,95 | 1    | 0,987 | 0        | 3 |
| Gbp7        | 0        | 0,93 | 0,94 | 0,613 | 0        | 3 |
| Zbp1        | 0        | 0,92 | 0,69 | 0,125 | 0        | 3 |
| Herc6       | 0        | 0,91 | 0,7  | 0,133 | 0        | 3 |
| Xaf1        | 0        | 0,86 | 0,86 | 0,376 | 0        | 3 |
| H2-T22      | 0        | 0,85 | 0,82 | 0,384 | 0        | 3 |

|              |           |      |      |       |           |   |
|--------------|-----------|------|------|-------|-----------|---|
| Irgm2        | 0         | 0,82 | 0,71 | 0,162 | 0         | 3 |
| Gbp9         | 0         | 0,82 | 0,66 | 0,123 | 0         | 3 |
| Dtx3l        | 0         | 0,81 | 0,74 | 0,287 | 0         | 3 |
| H2-Q6        | 0         | 0,81 | 0,59 | 0,123 | 0         | 3 |
| Tap1         | 0         | 0,79 | 0,8  | 0,33  | 0         | 3 |
| B2m          | 0         | 0,77 | 1    | 1     | 0         | 3 |
| Nlrc5        | 0         | 0,77 | 0,71 | 0,162 | 0         | 3 |
| Rtp4         | 0         | 0,77 | 0,61 | 0,12  | 0         | 3 |
| Rnf213       | 0         | 0,75 | 0,63 | 0,167 | 0         | 3 |
| Gbp5         | 0         | 0,74 | 0,53 | 0,071 | 0         | 3 |
| Trim12a      | 0         | 0,74 | 0,78 | 0,28  | 0         | 3 |
| Parp9        | 0         | 0,72 | 0,72 | 0,259 | 0         | 3 |
| Trim30d      | 0         | 0,71 | 0,58 | 0,155 | 0         | 3 |
| Usp18        | 0         | 0,71 | 0,4  | 0,069 | 0         | 3 |
| Stat2        | 0         | 0,7  | 0,72 | 0,241 | 0         | 3 |
| Batf2        | 0         | 0,7  | 0,5  | 0,048 | 0         | 3 |
| 930111J21Rik | 0         | 0,64 | 0,45 | 0,062 | 0         | 3 |
| Il12rb1      | 0         | 0,54 | 0,39 | 0,053 | 0         | 3 |
| Ciita        | 0         | 0,53 | 0,34 | 0,027 | 0         | 3 |
| Ifih1        | 0         | 0,53 | 0,46 | 0,088 | 0         | 3 |
| Il18bp       | 0         | 0,52 | 0,46 | 0,088 | 0         | 3 |
| Irf7         | 0         | 0,42 | 0,32 | 0,044 | 0         | 3 |
| Olfir56      | 0         | 0,4  | 0,37 | 0,036 | 0         | 3 |
| Ube2l6       | 0         | 0,39 | 0,4  | 0,062 | 0         | 3 |
| Serpina3g    | 2,26E-306 | 1,11 | 0,35 | 0,058 | 4,02E-302 | 3 |
| Irf1         | 2,70E-303 | 0,94 | 0,68 | 0,249 | 4,80E-299 | 3 |
| Tap2         | 1,82E-302 | 0,57 | 0,66 | 0,219 | 3,25E-298 | 3 |
| Trim30a      | 7,39E-302 | 0,79 | 0,59 | 0,178 | 1,32E-297 | 3 |
| Rsad2        | 3,45E-292 | 0,98 | 0,33 | 0,052 | 6,15E-288 | 3 |
| Samhd1       | 4,35E-290 | 0,71 | 0,67 | 0,238 | 7,74E-286 | 3 |
| Ifit3b       | 1,39E-287 | 0,85 | 0,54 | 0,153 | 2,47E-283 | 3 |
| H2-DMA       | 8,24E-284 | 0,59 | 0,44 | 0,101 | 1,47E-279 | 3 |
| Psme1        | 3,69E-265 | 0,75 | 0,98 | 0,907 | 6,58E-261 | 3 |
| H2-Ab1       | 9,04E-259 | 1,41 | 0,87 | 0,621 | 1,61E-254 | 3 |
| H2-Eb1       | 3,25E-255 | 1,42 | 0,82 | 0,492 | 5,78E-251 | 3 |
| Ifitm31      | 4,39E-255 | 0,71 | 1    | 0,999 | 7,82E-251 | 3 |
| H2-Aa        | 6,57E-254 | 1,31 | 0,72 | 0,329 | 1,17E-249 | 3 |
| Samd9l       | 2,64E-238 | 0,72 | 0,72 | 0,315 | 4,71E-234 | 3 |
| H2-M3        | 3,37E-236 | 0,34 | 0,38 | 0,083 | 6,01E-232 | 3 |
| Psme2        | 7,35E-233 | 0,66 | 0,97 | 0,889 | 1,31E-228 | 3 |
| Ddx60        | 1,59E-230 | 0,35 | 0,31 | 0,058 | 2,82E-226 | 3 |
| Tapbp        | 2,07E-229 | 0,68 | 0,87 | 0,577 | 3,68E-225 | 3 |
| H2-DMb1      | 2,10E-225 | 0,65 | 0,57 | 0,21  | 3,73E-221 | 3 |
| Parp10       | 8,05E-219 | 0,53 | 0,63 | 0,245 | 1,43E-214 | 3 |
| Lgals3bp     | 2,11E-216 | 0,65 | 0,99 | 0,902 | 3,76E-212 | 3 |
| Trim12c      | 3,83E-210 | 0,5  | 0,63 | 0,249 | 6,82E-206 | 3 |

|         |           |      |      |       |           |   |
|---------|-----------|------|------|-------|-----------|---|
| Slfn5   | 5,72E-196 | 0,38 | 0,39 | 0,101 | 1,02E-191 | 3 |
| Lgals9  | 2,02E-190 | 0,53 | 0,53 | 0,191 | 3,60E-186 | 3 |
| Trim34a | 2,11E-184 | 0,37 | 0,43 | 0,127 | 3,76E-180 | 3 |
| Ifi35   | 1,35E-176 | 0,51 | 0,64 | 0,293 | 2,40E-172 | 3 |
| Trafd1  | 7,64E-168 | 0,51 | 0,66 | 0,314 | 1,36E-163 | 3 |
| Eif2ak2 | 3,03E-165 | 0,56 | 0,75 | 0,423 | 5,39E-161 | 3 |
| Tvp23a  | 1,17E-160 | 0,51 | 0,73 | 0,398 | 2,09E-156 | 3 |
| Cd47    | 2,57E-153 | 0,48 | 0,98 | 0,928 | 4,57E-149 | 3 |
| Erap1   | 2,66E-153 | 0,35 | 0,5  | 0,187 | 4,73E-149 | 3 |
| Nampt   | 4,52E-147 | 0,42 | 0,63 | 0,3   | 8,05E-143 | 3 |
| Mkl1    | 6,61E-147 | 0,39 | 0,53 | 0,219 | 1,18E-142 | 3 |
| Cd74    | 3,92E-143 | 1,17 | 0,78 | 0,564 | 6,97E-139 | 3 |
| Irf9    | 2,34E-140 | 0,41 | 0,72 | 0,384 | 4,17E-136 | 3 |
| Tmsb10  | 4,86E-136 | 0,53 | 1    | 0,989 | 8,66E-132 | 3 |
| C21     | 1,82E-134 | 0,51 | 0,93 | 0,791 | 3,24E-130 | 3 |
| Nmi     | 2,18E-134 | 0,35 | 0,48 | 0,194 | 3,89E-130 | 3 |
| Ddx58   | 9,58E-134 | 0,51 | 0,57 | 0,27  | 1,71E-129 | 3 |
| Znfx1   | 9,47E-132 | 0,54 | 0,7  | 0,418 | 1,69E-127 | 3 |
| Parp11  | 8,22E-131 | 0,33 | 0,5  | 0,205 | 1,46E-126 | 3 |
| Trim25  | 4,83E-130 | 0,45 | 0,66 | 0,355 | 8,61E-126 | 3 |
| Clec2d  | 5,31E-119 | 0,55 | 0,81 | 0,595 | 9,45E-115 | 3 |
| Casp12  | 8,27E-119 | 0,35 | 0,52 | 0,232 | 1,47E-114 | 3 |
| Vwa5a   | 1,19E-114 | 0,41 | 0,7  | 0,42  | 2,12E-110 | 3 |
| Zc3hav1 | 1,07E-112 | 0,49 | 0,97 | 0,927 | 1,91E-108 | 3 |
| Lap3    | 2,39E-112 | 0,42 | 0,83 | 0,616 | 4,26E-108 | 3 |
| Csf1    | 2,17E-109 | 0,37 | 0,65 | 0,353 | 3,87E-105 | 3 |
| Parp3   | 1,48E-107 | 0,35 | 0,64 | 0,339 | 2,63E-103 | 3 |
| Ifit2   | 9,77E-102 | 0,58 | 0,54 | 0,272 | 1,74E-97  | 3 |
| Idnk    | 1,10E-101 | 0,32 | 0,54 | 0,266 | 1,95E-97  | 3 |
| Snx10   | 1,81E-101 | 0,4  | 0,91 | 0,813 | 3,23E-97  | 3 |
| C4b     | 1,32E-99  | 0,31 | 1    | 0,997 | 2,34E-95  | 3 |
| Fabp5   | 1,33E-97  | 0,51 | 0,96 | 0,91  | 2,37E-93  | 3 |
| Tubb3   | 1,16E-95  | 0,54 | 0,63 | 0,377 | 2,07E-91  | 3 |
| Art31   | 2,72E-90  | 0,55 | 0,6  | 0,353 | 4,83E-86  | 3 |
| Irf8    | 4,41E-85  | 0,61 | 0,88 | 0,834 | 7,85E-81  | 3 |
| Tor3a   | 3,67E-79  | 0,3  | 0,36 | 0,155 | 6,53E-75  | 3 |
| Tlr31   | 5,13E-79  | 0,35 | 0,68 | 0,436 | 9,13E-75  | 3 |
| Pfkip   | 4,15E-75  | 0,3  | 0,54 | 0,295 | 7,39E-71  | 3 |
| Rnf114  | 5,02E-72  | 0,31 | 0,63 | 0,397 | 8,94E-68  | 3 |
| Grn     | 1,10E-70  | 0,35 | 0,93 | 0,869 | 1,96E-66  | 3 |
| Usp25   | 3,51E-64  | 0,3  | 0,76 | 0,558 | 6,26E-60  | 3 |
| Ccl5    | 6,26E-57  | 0,33 | 0,43 | 0,23  | 1,11E-52  | 3 |
| Fchsd21 | 5,19E-54  | 0,36 | 0,85 | 0,761 | 9,25E-50  | 3 |
| Pla2g16 | 2,71E-47  | 0,31 | 0,71 | 0,574 | 4,82E-43  | 3 |
| Enpp21  | 1,55E-45  | 0,35 | 0,86 | 0,815 | 2,76E-41  | 3 |
| Ahnak   | 1,09E-44  | 0,39 | 0,78 | 0,651 | 1,94E-40  | 3 |

|            |          |      |      |       |          |   |
|------------|----------|------|------|-------|----------|---|
| Pmel1      | 5,03E-12 | 0,5  | 0,72 | 0,661 | 8,96E-08 | 3 |
| Pltp       | 0        | 2,68 | 0,92 | 0,215 | 0        | 4 |
| Serpine2   | 0        | 1,88 | 0,86 | 0,452 | 0        | 4 |
| Vcan       | 0        | 1,87 | 0,92 | 0,321 | 0        | 4 |
| Nes1       | 0        | 1,74 | 0,9  | 0,625 | 0        | 4 |
| Gpx3       | 0        | 1,69 | 0,88 | 0,496 | 0        | 4 |
| Mdm21      | 0        | 1,65 | 0,97 | 0,808 | 0        | 4 |
| Siva1      | 0        | 1,62 | 0,97 | 0,516 | 0        | 4 |
| Btc        | 0        | 1,58 | 0,68 | 0,124 | 0        | 4 |
| Carhsp1    | 0        | 1,51 | 0,9  | 0,246 | 0        | 4 |
| 700007K13R | 0        | 1,51 | 0,85 | 0,061 | 0        | 4 |
| Cald11     | 0        | 1,5  | 0,99 | 0,981 | 0        | 4 |
| Dcxr       | 0        | 1,45 | 0,93 | 0,457 | 0        | 4 |
| Itga6      | 0        | 1,44 | 0,89 | 0,474 | 0        | 4 |
| Celf5      | 0        | 1,38 | 0,85 | 0,058 | 0        | 4 |
| Pam1       | 0        | 1,37 | 0,98 | 0,885 | 0        | 4 |
| Sdc1       | 0        | 1,35 | 0,82 | 0,181 | 0        | 4 |
| Man2b1     | 0        | 1,35 | 0,98 | 0,896 | 0        | 4 |
| Espn       | 0        | 1,3  | 0,87 | 0,189 | 0        | 4 |
| Pmm1       | 0        | 1,21 | 0,97 | 0,852 | 0        | 4 |
| Cdkn1a1    | 0        | 1,21 | 1    | 0,953 | 0        | 4 |
| Ak1        | 0        | 1,16 | 0,89 | 0,348 | 0        | 4 |
| Kdm7a      | 0        | 1,16 | 0,99 | 0,967 | 0        | 4 |
| Zfp385a    | 0        | 1,14 | 0,85 | 0,222 | 0        | 4 |
| Mybl1      | 0        | 1,13 | 0,84 | 0,16  | 0        | 4 |
| Ahnak21    | 0        | 1,13 | 0,94 | 0,617 | 0        | 4 |
| Notch3     | 0        | 1,12 | 0,78 | 0,046 | 0        | 4 |
| Ccng1      | 0        | 1,11 | 0,98 | 0,856 | 0        | 4 |
| Plxdc2     | 0        | 1,11 | 0,97 | 0,821 | 0        | 4 |
| Dnajc9     | 0        | 1,11 | 0,99 | 0,88  | 0        | 4 |
| Cep170b    | 0        | 1,1  | 0,87 | 0,218 | 0        | 4 |
| Il11       | 0        | 1,09 | 0,5  | 0,024 | 0        | 4 |
| Crip2      | 0        | 1,08 | 0,99 | 0,967 | 0        | 4 |
| Palm3      | 0        | 1,08 | 0,64 | 0,02  | 0        | 4 |
| Ctxn1      | 0        | 1,07 | 0,93 | 0,711 | 0        | 4 |
| Pde3b      | 0        | 1,06 | 0,67 | 0,109 | 0        | 4 |
| Angptl2    | 0        | 1,05 | 0,95 | 0,783 | 0        | 4 |
| Ptprt      | 0        | 1,05 | 0,78 | 0,219 | 0        | 4 |
| Agpat4     | 0        | 1,04 | 0,84 | 0,279 | 0        | 4 |
| Ift27      | 0        | 1,04 | 0,88 | 0,41  | 0        | 4 |
| Rnase4     | 0        | 1,04 | 0,75 | 0,13  | 0        | 4 |
| Gtse1      | 0        | 1,03 | 0,84 | 0,149 | 0        | 4 |
| Fas        | 0        | 1,03 | 0,77 | 0,1   | 0        | 4 |
| Creb3l1    | 0        | 1,02 | 0,78 | 0,114 | 0        | 4 |
| Axl        | 0        | 1,02 | 0,81 | 0,293 | 0        | 4 |
| Ahi1       | 0        | 1,01 | 0,96 | 0,73  | 0        | 4 |

|            |   |      |      |       |   |   |
|------------|---|------|------|-------|---|---|
| Llph       | 0 | 1,01 | 0,97 | 0,786 | 0 | 4 |
| Akr1b101   | 0 | 1,01 | 0,97 | 0,842 | 0 | 4 |
| Ercc5      | 0 | 1,01 | 0,9  | 0,431 | 0 | 4 |
| Dusp15     | 0 | 1    | 0,73 | 0,118 | 0 | 4 |
| Fosl1      | 0 | 0,99 | 0,71 | 0,056 | 0 | 4 |
| Ubxn1      | 0 | 0,98 | 1    | 0,994 | 0 | 4 |
| Baiap2     | 0 | 0,98 | 0,89 | 0,566 | 0 | 4 |
| Klhl26     | 0 | 0,97 | 0,84 | 0,33  | 0 | 4 |
| Dgka       | 0 | 0,97 | 0,86 | 0,305 | 0 | 4 |
| Rps27l     | 0 | 0,97 | 1    | 0,996 | 0 | 4 |
| Tacc2      | 0 | 0,96 | 0,89 | 0,35  | 0 | 4 |
| Msh6       | 0 | 0,96 | 0,8  | 0,18  | 0 | 4 |
| Rap2a      | 0 | 0,95 | 0,89 | 0,394 | 0 | 4 |
| Nme4       | 0 | 0,95 | 0,7  | 0,171 | 0 | 4 |
| Casp3      | 0 | 0,95 | 0,88 | 0,339 | 0 | 4 |
| Ei24       | 0 | 0,93 | 0,94 | 0,668 | 0 | 4 |
| Eda2r      | 0 | 0,93 | 0,81 | 0,217 | 0 | 4 |
| Wdr35      | 0 | 0,92 | 0,75 | 0,224 | 0 | 4 |
| Zmat3      | 0 | 0,92 | 0,93 | 0,672 | 0 | 4 |
| Pcgf3      | 0 | 0,91 | 0,92 | 0,67  | 0 | 4 |
| Prrc2b     | 0 | 0,91 | 0,99 | 0,929 | 0 | 4 |
| Trim7      | 0 | 0,91 | 0,79 | 0,198 | 0 | 4 |
| Cyr61      | 0 | 0,91 | 0,46 | 0,081 | 0 | 4 |
| Ano3       | 0 | 0,9  | 0,81 | 0,284 | 0 | 4 |
| Tnks2      | 0 | 0,88 | 0,98 | 0,898 | 0 | 4 |
| Cpt1c      | 0 | 0,87 | 0,89 | 0,475 | 0 | 4 |
| Polk       | 0 | 0,87 | 0,88 | 0,369 | 0 | 4 |
| Nrp1       | 0 | 0,87 | 0,75 | 0,181 | 0 | 4 |
| Frmd4b     | 0 | 0,86 | 0,82 | 0,292 | 0 | 4 |
| Fbxw9      | 0 | 0,86 | 0,78 | 0,222 | 0 | 4 |
| Anks1b     | 0 | 0,85 | 0,73 | 0,082 | 0 | 4 |
| Gtf3c1     | 0 | 0,85 | 0,91 | 0,632 | 0 | 4 |
| 600006K01R | 0 | 0,83 | 0,64 | 0,034 | 0 | 4 |
| Ddit4l     | 0 | 0,83 | 0,61 | 0,06  | 0 | 4 |
| Cad        | 0 | 0,83 | 0,77 | 0,259 | 0 | 4 |
| Abhd4      | 0 | 0,82 | 0,93 | 0,74  | 0 | 4 |
| Tmem184c   | 0 | 0,82 | 0,81 | 0,344 | 0 | 4 |
| Fam19a5    | 0 | 0,82 | 0,67 | 0,143 | 0 | 4 |
| Plxna1     | 0 | 0,82 | 0,86 | 0,403 | 0 | 4 |
| Slc22a23   | 0 | 0,82 | 0,72 | 0,238 | 0 | 4 |
| Ptpn14     | 0 | 0,81 | 0,97 | 0,85  | 0 | 4 |
| Ppp1r14b   | 0 | 0,81 | 1    | 0,997 | 0 | 4 |
| Glr3       | 0 | 0,8  | 0,98 | 0,878 | 0 | 4 |
| Fam216a    | 0 | 0,8  | 0,82 | 0,311 | 0 | 4 |
| Mlec       | 0 | 0,78 | 1    | 0,972 | 0 | 4 |
| Tmem63b    | 0 | 0,78 | 0,98 | 0,947 | 0 | 4 |

|           |   |      |      |       |   |   |
|-----------|---|------|------|-------|---|---|
| Tbc1d8    | 0 | 0,78 | 0,63 | 0,041 | 0 | 4 |
| Synm      | 0 | 0,77 | 0,59 | 0,069 | 0 | 4 |
| Arl4c     | 0 | 0,76 | 0,59 | 0,094 | 0 | 4 |
| Tap11     | 0 | 0,76 | 0,84 | 0,333 | 0 | 4 |
| Thyn1     | 0 | 0,75 | 0,8  | 0,315 | 0 | 4 |
| Pidd1     | 0 | 0,75 | 0,74 | 0,151 | 0 | 4 |
| Tnfrsf10b | 0 | 0,75 | 0,76 | 0,206 | 0 | 4 |
| Dgki      | 0 | 0,73 | 0,61 | 0,071 | 0 | 4 |
| Zfpm1     | 0 | 0,73 | 0,74 | 0,252 | 0 | 4 |
| Mcm7      | 0 | 0,73 | 0,75 | 0,248 | 0 | 4 |
| Pqlc3     | 0 | 0,72 | 0,75 | 0,187 | 0 | 4 |
| Cd109     | 0 | 0,71 | 0,57 | 0,099 | 0 | 4 |
| Crabp2    | 0 | 0,71 | 0,32 | 0,025 | 0 | 4 |
| Tpp1      | 0 | 0,7  | 1    | 0,997 | 0 | 4 |
| Ass1      | 0 | 0,7  | 0,53 | 0,036 | 0 | 4 |
| Vopp1     | 0 | 0,7  | 0,66 | 0,095 | 0 | 4 |
| Slc2a9    | 0 | 0,69 | 0,73 | 0,242 | 0 | 4 |
| Igdcc4    | 0 | 0,69 | 0,66 | 0,154 | 0 | 4 |
| Kank3     | 0 | 0,69 | 0,65 | 0,141 | 0 | 4 |
| Plekha7   | 0 | 0,68 | 0,66 | 0,095 | 0 | 4 |
| Scand1    | 0 | 0,68 | 1    | 0,992 | 0 | 4 |
| Serinc3   | 0 | 0,68 | 1    | 0,991 | 0 | 4 |
| Samd12    | 0 | 0,67 | 0,44 | 0,012 | 0 | 4 |
| Dcaf4     | 0 | 0,65 | 0,68 | 0,211 | 0 | 4 |
| Tnfrsf18  | 0 | 0,65 | 0,37 | 0,019 | 0 | 4 |
| Ptp4a2    | 0 | 0,63 | 1    | 0,989 | 0 | 4 |
| Efnb2     | 0 | 0,63 | 0,49 | 0,062 | 0 | 4 |
| Pde5a     | 0 | 0,62 | 0,6  | 0,143 | 0 | 4 |
| Azin2     | 0 | 0,62 | 0,6  | 0,127 | 0 | 4 |
| Icam1     | 0 | 0,61 | 0,67 | 0,183 | 0 | 4 |
| Pitpnm2   | 0 | 0,59 | 0,62 | 0,121 | 0 | 4 |
| Chst3     | 0 | 0,59 | 0,58 | 0,126 | 0 | 4 |
| Cercam    | 0 | 0,59 | 0,6  | 0,108 | 0 | 4 |
| Rbm38     | 0 | 0,58 | 0,61 | 0,133 | 0 | 4 |
| Slc19a2   | 0 | 0,58 | 0,67 | 0,178 | 0 | 4 |
| Ano1      | 0 | 0,57 | 0,48 | 0,074 | 0 | 4 |
| Slc37a2   | 0 | 0,57 | 0,5  | 0,048 | 0 | 4 |
| Slc27a3   | 0 | 0,56 | 0,61 | 0,13  | 0 | 4 |
| Tubb6     | 0 | 0,55 | 0,56 | 0,131 | 0 | 4 |
| Bcam      | 0 | 0,54 | 0,52 | 0,076 | 0 | 4 |
| Cgref1    | 0 | 0,54 | 0,47 | 0,022 | 0 | 4 |
| Arhgap28  | 0 | 0,54 | 0,54 | 0,085 | 0 | 4 |
| Cox6b2    | 0 | 0,52 | 0,48 | 0,073 | 0 | 4 |
| Slitrk5   | 0 | 0,51 | 0,43 | 0,026 | 0 | 4 |
| Ddias     | 0 | 0,47 | 0,48 | 0,06  | 0 | 4 |
| Spc25     | 0 | 0,47 | 0,49 | 0,057 | 0 | 4 |

|           |           |      |      |       |           |   |
|-----------|-----------|------|------|-------|-----------|---|
| Sp9       | 0         | 0,46 | 0,38 | 0,011 | 0         | 4 |
| Osbpl5    | 0         | 0,45 | 0,45 | 0,07  | 0         | 4 |
| Igsf9b    | 0         | 0,45 | 0,35 | 0,021 | 0         | 4 |
| Ppp1r13l  | 0         | 0,44 | 0,4  | 0,031 | 0         | 4 |
| Tcea3     | 0         | 0,41 | 0,31 | 0,008 | 0         | 4 |
| Nxn       | 0         | 0,33 | 0,31 | 0,033 | 0         | 4 |
| Reep2     | 2,04E-306 | 0,4  | 0,42 | 0,071 | 3,63E-302 | 4 |
| Mical2    | 6,60E-306 | 0,77 | 0,51 | 0,112 | 1,18E-301 | 4 |
| Frrs1     | 1,06E-305 | 0,81 | 0,93 | 0,617 | 1,89E-301 | 4 |
| Trp53inp1 | 1,21E-305 | 0,84 | 0,92 | 0,671 | 2,15E-301 | 4 |
| Nt5dc2    | 5,42E-305 | 1,14 | 0,45 | 0,091 | 9,65E-301 | 4 |
| Dzip1     | 7,39E-305 | 0,7  | 0,78 | 0,297 | 1,32E-300 | 4 |
| Susd6     | 6,03E-304 | 0,8  | 0,95 | 0,818 | 1,07E-299 | 4 |
| Ttc28     | 8,91E-304 | 0,78 | 0,99 | 0,936 | 1,59E-299 | 4 |
| Arhgap11a | 1,01E-303 | 0,49 | 0,56 | 0,129 | 1,79E-299 | 4 |
| Ier5      | 1,05E-303 | 0,96 | 0,66 | 0,214 | 1,86E-299 | 4 |
| Hmg20b    | 8,35E-303 | 0,76 | 0,98 | 0,91  | 1,49E-298 | 4 |
| Mapre1    | 1,47E-302 | 0,75 | 0,99 | 0,927 | 2,62E-298 | 4 |
| Gtf3a     | 2,15E-302 | 0,92 | 0,89 | 0,589 | 3,83E-298 | 4 |
| Pdgfa1    | 9,29E-302 | 0,84 | 0,98 | 0,906 | 1,65E-297 | 4 |
| Canx      | 8,00E-301 | 0,63 | 1    | 0,993 | 1,42E-296 | 4 |
| Bax       | 3,60E-299 | 0,7  | 1    | 0,988 | 6,41E-295 | 4 |
| Rb1       | 5,84E-299 | 0,66 | 0,76 | 0,281 | 1,04E-294 | 4 |
| Homer3    | 1,30E-297 | 0,78 | 0,9  | 0,593 | 2,32E-293 | 4 |
| Sulf21    | 4,47E-294 | 0,78 | 0,99 | 0,945 | 7,97E-290 | 4 |
| Nudcd2    | 4,29E-293 | 0,74 | 0,82 | 0,367 | 7,64E-289 | 4 |
| P2rx7     | 2,46E-292 | 0,46 | 0,53 | 0,125 | 4,39E-288 | 4 |
| Akap13    | 1,64E-291 | 0,78 | 0,99 | 0,918 | 2,92E-287 | 4 |
| Sesn2     | 1,87E-290 | 0,7  | 0,78 | 0,311 | 3,33E-286 | 4 |
| Ngfr      | 3,02E-289 | 0,41 | 0,31 | 0,039 | 5,38E-285 | 4 |
| Dgkh      | 8,96E-289 | 0,72 | 0,74 | 0,266 | 1,60E-284 | 4 |
| Stk38l    | 9,69E-288 | 0,59 | 0,66 | 0,202 | 1,72E-283 | 4 |
| Ctsf      | 1,92E-287 | 0,69 | 0,74 | 0,286 | 3,42E-283 | 4 |
| Nkain2    | 3,63E-287 | 0,48 | 0,48 | 0,102 | 6,46E-283 | 4 |
| Sox4      | 5,08E-286 | 0,88 | 1    | 0,995 | 9,05E-282 | 4 |
| Nucks1    | 2,16E-284 | 0,57 | 1    | 0,983 | 3,84E-280 | 4 |
| Trim241   | 1,47E-283 | 0,83 | 0,99 | 0,982 | 2,62E-279 | 4 |
| Gdnf      | 7,56E-283 | 0,89 | 0,55 | 0,14  | 1,35E-278 | 4 |
| Gm16286   | 3,39E-282 | 0,86 | 0,91 | 0,7   | 6,03E-278 | 4 |
| Arl8a     | 1,27E-280 | 0,76 | 0,96 | 0,873 | 2,26E-276 | 4 |
| Ncor2     | 2,09E-280 | 0,8  | 0,91 | 0,694 | 3,72E-276 | 4 |
| Steap3    | 2,90E-279 | 0,76 | 0,75 | 0,297 | 5,16E-275 | 4 |
| Ppm1a     | 6,01E-279 | 0,68 | 0,97 | 0,881 | 1,07E-274 | 4 |
| Peak1     | 1,58E-278 | 0,96 | 0,85 | 0,472 | 2,82E-274 | 4 |
| Ubl3      | 1,26E-277 | 0,6  | 1    | 0,979 | 2,24E-273 | 4 |
| Btg2      | 1,51E-275 | 1,05 | 0,94 | 0,669 | 2,69E-271 | 4 |



|          |           |      |      |       |           |   |
|----------|-----------|------|------|-------|-----------|---|
| Rnf169   | 1,18E-272 | 0,73 | 0,89 | 0,55  | 2,09E-268 | 4 |
| Btg1     | 6,53E-272 | 0,98 | 0,93 | 0,789 | 1,16E-267 | 4 |
| Micall1  | 5,51E-271 | 0,89 | 0,89 | 0,645 | 9,82E-267 | 4 |
| Pak3     | 1,32E-270 | 1,12 | 0,75 | 0,323 | 2,35E-266 | 4 |
| Nfic     | 1,61E-270 | 0,66 | 1    | 0,991 | 2,86E-266 | 4 |
| Cpne2    | 5,11E-270 | 0,72 | 0,96 | 0,839 | 9,10E-266 | 4 |
| Utp20    | 9,17E-270 | 0,62 | 0,71 | 0,259 | 1,63E-265 | 4 |
| March5   | 1,57E-269 | 0,69 | 0,95 | 0,828 | 2,79E-265 | 4 |
| Pgls     | 6,82E-269 | 0,59 | 1    | 0,995 | 1,21E-264 | 4 |
| Mpp7     | 7,31E-269 | 0,73 | 0,72 | 0,276 | 1,30E-264 | 4 |
| Def6     | 4,86E-268 | 0,39 | 0,43 | 0,086 | 8,65E-264 | 4 |
| Acox3    | 4,51E-266 | 0,63 | 0,69 | 0,246 | 8,03E-262 | 4 |
| Ube2i    | 5,00E-266 | 0,66 | 0,98 | 0,937 | 8,90E-262 | 4 |
| Fat1     | 5,58E-266 | 0,73 | 0,92 | 0,692 | 9,93E-262 | 4 |
| Parvb    | 1,46E-265 | 0,75 | 0,89 | 0,599 | 2,60E-261 | 4 |
| Cdc42bpg | 5,06E-265 | 0,72 | 0,81 | 0,361 | 9,01E-261 | 4 |
| Phf20l11 | 6,72E-265 | 0,66 | 0,99 | 0,955 | 1,20E-260 | 4 |
| Cenpt    | 1,37E-263 | 0,58 | 0,51 | 0,129 | 2,43E-259 | 4 |
| Dstn     | 1,71E-262 | 0,6  | 1    | 0,994 | 3,04E-258 | 4 |
| Map3k20  | 1,75E-262 | 0,68 | 0,95 | 0,738 | 3,12E-258 | 4 |
| Pten     | 2,19E-261 | 0,63 | 0,98 | 0,926 | 3,90E-257 | 4 |
| Akap1    | 2,29E-261 | 0,59 | 0,68 | 0,242 | 4,07E-257 | 4 |
| Il15     | 4,07E-261 | 0,33 | 0,37 | 0,063 | 7,25E-257 | 4 |
| Slc35d1  | 2,75E-259 | 0,62 | 0,72 | 0,278 | 4,89E-255 | 4 |
| Dusp14   | 3,21E-259 | 0,38 | 0,36 | 0,061 | 5,72E-255 | 4 |
| Agap1    | 2,05E-258 | 0,74 | 0,88 | 0,554 | 3,64E-254 | 4 |
| Tmbim1   | 5,62E-258 | 0,68 | 0,93 | 0,737 | 1,00E-253 | 4 |
| Rtkn     | 9,53E-258 | 0,7  | 0,8  | 0,371 | 1,70E-253 | 4 |
| Itpril1  | 3,69E-257 | 0,53 | 0,62 | 0,196 | 6,56E-253 | 4 |
| Glis3    | 4,63E-257 | 0,44 | 0,48 | 0,115 | 8,24E-253 | 4 |
| Mapkbp1  | 1,02E-255 | 0,53 | 0,55 | 0,155 | 1,82E-251 | 4 |
| Naa40    | 8,08E-255 | 0,52 | 0,64 | 0,204 | 1,44E-250 | 4 |
| Lgr6     | 1,17E-254 | 0,79 | 0,64 | 0,223 | 2,09E-250 | 4 |
| Thra     | 1,24E-254 | 0,71 | 0,92 | 0,735 | 2,21E-250 | 4 |
| Piezo1   | 4,76E-254 | 0,69 | 0,92 | 0,737 | 8,48E-250 | 4 |
| Gfer     | 1,72E-253 | 0,65 | 0,72 | 0,296 | 3,06E-249 | 4 |
| Bscl2    | 2,74E-253 | 0,7  | 0,96 | 0,876 | 4,88E-249 | 4 |
| Hras     | 1,75E-252 | 0,8  | 0,88 | 0,651 | 3,12E-248 | 4 |
| Cdc34    | 9,04E-252 | 0,7  | 0,94 | 0,808 | 1,61E-247 | 4 |
| Mettl6   | 1,32E-251 | 0,68 | 0,79 | 0,355 | 2,35E-247 | 4 |
| Srgap3   | 4,28E-251 | 0,36 | 0,39 | 0,075 | 7,61E-247 | 4 |
| Mgmt     | 5,10E-250 | 0,57 | 0,63 | 0,205 | 9,08E-246 | 4 |
| Rgs12    | 1,04E-249 | 0,66 | 0,82 | 0,377 | 1,86E-245 | 4 |
| Luzp1    | 1,34E-249 | 0,71 | 0,84 | 0,447 | 2,38E-245 | 4 |
| Ptp4a1   | 3,83E-249 | 0,66 | 0,95 | 0,81  | 6,83E-245 | 4 |
| Bin1     | 3,74E-245 | 0,73 | 0,86 | 0,563 | 6,66E-241 | 4 |

|          |           |      |      |       |           |   |
|----------|-----------|------|------|-------|-----------|---|
| Odf2     | 6,43E-245 | 0,65 | 0,78 | 0,348 | 1,14E-240 | 4 |
| N4bp1    | 6,76E-245 | 0,64 | 0,97 | 0,892 | 1,20E-240 | 4 |
| Aldh4a1  | 1,23E-243 | 0,4  | 0,46 | 0,107 | 2,19E-239 | 4 |
| Ablim1   | 1,49E-243 | 0,78 | 0,94 | 0,806 | 2,65E-239 | 4 |
| Bloc1s2  | 2,88E-242 | 0,64 | 0,74 | 0,311 | 5,13E-238 | 4 |
| Arpc2    | 1,42E-241 | 0,6  | 1    | 0,992 | 2,52E-237 | 4 |
| Rps19    | 2,06E-241 | 0,53 | 1    | 1     | 3,67E-237 | 4 |
| H2afj    | 5,46E-241 | 0,62 | 1    | 0,986 | 9,71E-237 | 4 |
| Csnk1g11 | 6,62E-240 | 0,72 | 0,88 | 0,582 | 1,18E-235 | 4 |
| Fam212b1 | 1,84E-239 | 0,71 | 0,89 | 0,559 | 3,28E-235 | 4 |
| Timp31   | 7,21E-238 | 0,95 | 0,96 | 0,805 | 1,28E-233 | 4 |
| Itga8    | 7,78E-238 | 0,44 | 0,48 | 0,116 | 1,38E-233 | 4 |
| Qpctl    | 8,22E-238 | 0,6  | 0,61 | 0,207 | 1,46E-233 | 4 |
| Pitpnc1  | 1,37E-237 | 0,64 | 0,75 | 0,321 | 2,44E-233 | 4 |
| Limch1   | 2,03E-236 | 0,77 | 0,93 | 0,788 | 3,62E-232 | 4 |
| Rpl19    | 1,12E-235 | 0,46 | 1    | 1     | 1,99E-231 | 4 |
| Pa2g4    | 1,46E-235 | 0,69 | 0,91 | 0,739 | 2,60E-231 | 4 |
| Arhgap23 | 9,27E-235 | 0,64 | 0,78 | 0,358 | 1,65E-230 | 4 |
| Lnpep    | 7,02E-234 | 0,65 | 0,97 | 0,888 | 1,25E-229 | 4 |
| Aen      | 1,44E-233 | 0,66 | 0,89 | 0,559 | 2,57E-229 | 4 |
| Aaas     | 7,62E-233 | 0,57 | 0,71 | 0,286 | 1,36E-228 | 4 |
| Aprt     | 2,08E-231 | 0,78 | 0,96 | 0,885 | 3,70E-227 | 4 |
| Dusp10   | 7,17E-231 | 0,68 | 0,54 | 0,166 | 1,28E-226 | 4 |
| Scoc     | 9,24E-231 | 0,58 | 0,99 | 0,966 | 1,64E-226 | 4 |
| Apaf11   | 4,24E-229 | 0,67 | 0,87 | 0,549 | 7,54E-225 | 4 |
| Rnf187   | 4,67E-229 | 0,65 | 0,92 | 0,817 | 8,32E-225 | 4 |
| Dnajb1   | 3,78E-228 | 0,84 | 0,87 | 0,616 | 6,72E-224 | 4 |
| Exoc4    | 1,21E-226 | 0,56 | 1    | 0,98  | 2,16E-222 | 4 |
| Heca     | 3,07E-225 | 0,57 | 0,71 | 0,29  | 5,46E-221 | 4 |
| Nrip11   | 5,99E-225 | 0,66 | 1    | 0,991 | 1,07E-220 | 4 |
| Tubb4b   | 7,61E-225 | 0,92 | 0,98 | 0,904 | 1,36E-220 | 4 |
| Itm2a    | 8,43E-225 | 0,46 | 0,4  | 0,089 | 1,50E-220 | 4 |
| Srp72    | 6,39E-224 | 0,61 | 0,98 | 0,942 | 1,14E-219 | 4 |
| Hmga21   | 1,06E-223 | 0,85 | 0,99 | 0,958 | 1,88E-219 | 4 |
| Tmbim4   | 3,18E-221 | 0,65 | 0,93 | 0,814 | 5,67E-217 | 4 |
| Rad9a    | 1,14E-220 | 0,42 | 0,47 | 0,124 | 2,03E-216 | 4 |
| Pdrg1    | 6,01E-220 | 0,67 | 0,89 | 0,664 | 1,07E-215 | 4 |
| Txn1     | 2,35E-219 | 0,61 | 0,98 | 0,932 | 4,18E-215 | 4 |
| Slc39a7  | 3,10E-218 | 0,64 | 0,91 | 0,718 | 5,51E-214 | 4 |
| Hmga1    | 3,18E-218 | 0,75 | 0,79 | 0,428 | 5,67E-214 | 4 |
| Tmem127  | 6,42E-217 | 0,64 | 0,85 | 0,561 | 1,14E-212 | 4 |
| Cpped1   | 2,64E-216 | 0,63 | 0,8  | 0,407 | 4,71E-212 | 4 |
| Mmp151   | 8,15E-216 | 0,68 | 0,94 | 0,778 | 1,45E-211 | 4 |
| Tpm1     | 3,03E-215 | 0,97 | 0,9  | 0,774 | 5,39E-211 | 4 |
| Ptpdc1   | 3,47E-215 | 0,45 | 0,55 | 0,167 | 6,18E-211 | 4 |
| Esd      | 5,53E-215 | 0,71 | 0,97 | 0,926 | 9,85E-211 | 4 |

|             |           |      |      |       |           |   |
|-------------|-----------|------|------|-------|-----------|---|
| Emp1        | 8,29E-215 | 0,93 | 0,95 | 0,82  | 1,48E-210 | 4 |
| Pcdh7       | 2,39E-214 | 0,82 | 0,71 | 0,309 | 4,26E-210 | 4 |
| Ctnnal1     | 4,36E-213 | 0,33 | 0,35 | 0,068 | 7,75E-209 | 4 |
| Abhd14a     | 6,11E-213 | 0,65 | 0,83 | 0,505 | 1,09E-208 | 4 |
| Rps3        | 2,47E-212 | 0,47 | 1    | 1     | 4,40E-208 | 4 |
| Lmna        | 8,22E-211 | 0,62 | 1    | 0,995 | 1,46E-206 | 4 |
| Sfmbt1      | 9,18E-211 | 0,55 | 0,7  | 0,294 | 1,63E-206 | 4 |
| Vps41       | 1,42E-210 | 0,61 | 0,91 | 0,751 | 2,53E-206 | 4 |
| Tmem5       | 2,13E-210 | 0,59 | 0,95 | 0,847 | 3,79E-206 | 4 |
| Adcy7       | 3,58E-209 | 0,44 | 0,36 | 0,078 | 6,37E-205 | 4 |
| Cast        | 7,45E-206 | 0,58 | 0,96 | 0,864 | 1,33E-201 | 4 |
| Ndufab1     | 9,83E-206 | 0,6  | 0,98 | 0,92  | 1,75E-201 | 4 |
| Ppp2r5d     | 9,91E-205 | 0,55 | 0,73 | 0,328 | 1,76E-200 | 4 |
| Sh2b1       | 1,50E-204 | 0,57 | 0,76 | 0,355 | 2,67E-200 | 4 |
| Klhl8       | 3,38E-204 | 0,35 | 0,41 | 0,099 | 6,02E-200 | 4 |
| Col27a1     | 3,91E-204 | 0,61 | 0,71 | 0,293 | 6,96E-200 | 4 |
| Sac3d1      | 2,77E-203 | 0,54 | 0,74 | 0,339 | 4,94E-199 | 4 |
| Trib1       | 7,57E-202 | 0,81 | 0,97 | 0,931 | 1,35E-197 | 4 |
| Psrc1       | 1,01E-201 | 0,6  | 0,95 | 0,758 | 1,80E-197 | 4 |
| Ier5l       | 3,82E-201 | 0,63 | 0,77 | 0,385 | 6,79E-197 | 4 |
| Dennd2c     | 7,85E-201 | 0,44 | 0,53 | 0,166 | 1,40E-196 | 4 |
| Bmt2        | 1,12E-200 | 0,66 | 0,79 | 0,442 | 1,99E-196 | 4 |
| Glrx5       | 6,97E-200 | 0,63 | 0,82 | 0,487 | 1,24E-195 | 4 |
| Sgsm2       | 1,48E-199 | 0,49 | 0,62 | 0,23  | 2,63E-195 | 4 |
| Fuca1       | 1,82E-199 | 0,55 | 1    | 0,99  | 3,25E-195 | 4 |
| 110012L19Ri | 6,16E-199 | 0,5  | 0,64 | 0,252 | 1,10E-194 | 4 |
| Tmem184b    | 2,51E-198 | 0,6  | 0,76 | 0,387 | 4,48E-194 | 4 |
| Smad3       | 3,93E-198 | 0,52 | 0,64 | 0,248 | 6,99E-194 | 4 |
| Pdzrn3      | 6,69E-198 | 0,57 | 0,71 | 0,313 | 1,19E-193 | 4 |
| Ypel3       | 1,10E-197 | 0,59 | 0,93 | 0,796 | 1,96E-193 | 4 |
| Tet1        | 2,42E-197 | 0,31 | 0,31 | 0,059 | 4,31E-193 | 4 |
| Ccs         | 4,96E-197 | 0,62 | 0,89 | 0,713 | 8,83E-193 | 4 |
| Phlda31     | 2,21E-196 | 0,55 | 0,99 | 0,959 | 3,93E-192 | 4 |
| Pabpc1      | 1,11E-195 | 0,57 | 1    | 0,998 | 1,97E-191 | 4 |
| Ggct        | 1,78E-195 | 1,25 | 0,77 | 0,474 | 3,17E-191 | 4 |
| Yeats2      | 5,14E-195 | 0,59 | 0,83 | 0,457 | 9,15E-191 | 4 |
| Plxnb2      | 8,16E-195 | 0,55 | 0,98 | 0,923 | 1,45E-190 | 4 |
| Irx5        | 9,15E-195 | 0,54 | 0,66 | 0,258 | 1,63E-190 | 4 |
| Rab23       | 7,70E-194 | 0,53 | 0,58 | 0,211 | 1,37E-189 | 4 |
| Ndufb6      | 1,03E-193 | 0,58 | 0,98 | 0,909 | 1,83E-189 | 4 |
| Rev1        | 1,26E-193 | 0,55 | 0,78 | 0,381 | 2,24E-189 | 4 |
| Mak16       | 2,01E-193 | 0,62 | 0,87 | 0,659 | 3,57E-189 | 4 |
| Atp13a2     | 4,27E-192 | 0,58 | 0,72 | 0,34  | 7,60E-188 | 4 |
| Tanc2       | 1,09E-191 | 0,5  | 0,57 | 0,199 | 1,94E-187 | 4 |
| Stard5      | 3,48E-191 | 0,51 | 0,64 | 0,256 | 6,20E-187 | 4 |
| Pigf        | 3,64E-191 | 0,46 | 0,53 | 0,174 | 6,47E-187 | 4 |

|          |           |      |      |       |           |   |
|----------|-----------|------|------|-------|-----------|---|
| Prkaa2   | 2,15E-190 | 0,34 | 0,38 | 0,088 | 3,83E-186 | 4 |
| Plppb1   | 2,95E-190 | 0,58 | 0,91 | 0,738 | 5,25E-186 | 4 |
| Ifngr2   | 4,08E-190 | 0,54 | 0,67 | 0,289 | 7,26E-186 | 4 |
| Acadvl   | 4,65E-189 | 0,62 | 0,77 | 0,415 | 8,28E-185 | 4 |
| Tchp     | 1,89E-188 | 0,43 | 0,54 | 0,175 | 3,36E-184 | 4 |
| Cmip     | 2,84E-188 | 0,6  | 0,86 | 0,645 | 5,06E-184 | 4 |
| Kif13a   | 1,01E-187 | 0,56 | 0,73 | 0,352 | 1,80E-183 | 4 |
| Ppm1d    | 1,80E-187 | 0,39 | 0,52 | 0,168 | 3,21E-183 | 4 |
| Hprt     | 4,20E-184 | 0,57 | 0,82 | 0,499 | 7,48E-180 | 4 |
| Mthfd1   | 4,54E-184 | 0,37 | 0,46 | 0,131 | 8,09E-180 | 4 |
| Ktn1     | 7,82E-184 | 0,41 | 1    | 0,999 | 1,39E-179 | 4 |
| Nudt5    | 1,31E-183 | 0,57 | 0,77 | 0,404 | 2,33E-179 | 4 |
| Stard10  | 3,39E-183 | 0,5  | 0,59 | 0,227 | 6,03E-179 | 4 |
| Rpe      | 5,25E-183 | 0,53 | 0,69 | 0,307 | 9,35E-179 | 4 |
| Rps11    | 8,31E-183 | 0,42 | 1    | 1     | 1,48E-178 | 4 |
| Gse1     | 1,56E-182 | 0,57 | 0,92 | 0,794 | 2,77E-178 | 4 |
| Pml      | 3,56E-182 | 0,53 | 0,75 | 0,37  | 6,34E-178 | 4 |
| Trafd11  | 8,19E-182 | 0,5  | 0,71 | 0,315 | 1,46E-177 | 4 |
| Plekhh2  | 4,07E-180 | 0,45 | 0,53 | 0,181 | 7,24E-176 | 4 |
| Cers4    | 7,15E-180 | 0,52 | 1    | 0,988 | 1,27E-175 | 4 |
| Rbm17    | 9,99E-180 | 0,6  | 0,88 | 0,678 | 1,78E-175 | 4 |
| Apbb2    | 1,48E-179 | 0,54 | 0,78 | 0,414 | 2,64E-175 | 4 |
| Tmem43   | 1,59E-179 | 0,56 | 0,8  | 0,435 | 2,83E-175 | 4 |
| Arl13b   | 2,12E-179 | 0,57 | 0,74 | 0,384 | 3,78E-175 | 4 |
| Maf      | 2,60E-179 | 0,73 | 0,95 | 0,871 | 4,64E-175 | 4 |
| Tmem38a  | 2,09E-177 | 0,33 | 0,35 | 0,081 | 3,73E-173 | 4 |
| Trim11   | 2,33E-177 | 0,42 | 0,56 | 0,201 | 4,15E-173 | 4 |
| Ampd2    | 4,67E-177 | 0,45 | 0,62 | 0,245 | 8,32E-173 | 4 |
| Atf3     | 1,12E-176 | 1,14 | 0,64 | 0,29  | 1,99E-172 | 4 |
| Zyx      | 2,18E-176 | 0,69 | 1    | 0,983 | 3,89E-172 | 4 |
| Rab40c   | 5,41E-176 | 0,45 | 0,6  | 0,228 | 9,63E-172 | 4 |
| Cby1     | 1,32E-175 | 0,52 | 0,71 | 0,348 | 2,35E-171 | 4 |
| Tax1bp1  | 1,70E-175 | 0,4  | 1    | 0,998 | 3,03E-171 | 4 |
| Arhgap35 | 3,04E-175 | 0,53 | 0,89 | 0,67  | 5,41E-171 | 4 |
| Exoc7    | 6,96E-175 | 0,58 | 0,73 | 0,368 | 1,24E-170 | 4 |
| Erich1   | 2,47E-174 | 0,56 | 0,81 | 0,493 | 4,40E-170 | 4 |
| Lamb1    | 3,81E-174 | 0,5  | 0,49 | 0,161 | 6,78E-170 | 4 |
| Zfp703   | 6,72E-174 | 0,84 | 0,87 | 0,728 | 1,20E-169 | 4 |
| L3mbtl3  | 7,17E-174 | 0,55 | 0,7  | 0,333 | 1,28E-169 | 4 |
| Ckap2    | 3,25E-172 | 0,34 | 0,44 | 0,127 | 5,78E-168 | 4 |
| Slc5a3   | 3,58E-172 | 0,64 | 0,86 | 0,609 | 6,37E-168 | 4 |
| Adarb1   | 1,15E-171 | 0,53 | 0,54 | 0,19  | 2,04E-167 | 4 |
| Tgif1    | 1,55E-171 | 0,54 | 0,65 | 0,287 | 2,76E-167 | 4 |
| Emd      | 2,21E-171 | 0,53 | 0,83 | 0,54  | 3,93E-167 | 4 |
| Wwp1     | 2,38E-171 | 0,56 | 0,84 | 0,565 | 4,24E-167 | 4 |
| Efnb1    | 3,94E-171 | 0,52 | 0,64 | 0,276 | 7,02E-167 | 4 |

|          |           |      |      |       |           |   |
|----------|-----------|------|------|-------|-----------|---|
| Serinc5  | 1,94E-170 | 0,58 | 0,65 | 0,292 | 3,46E-166 | 4 |
| Wrap73   | 2,26E-170 | 0,45 | 0,56 | 0,213 | 4,02E-166 | 4 |
| Mxra7    | 2,94E-170 | 0,52 | 0,96 | 0,903 | 5,23E-166 | 4 |
| Tpst2    | 3,02E-170 | 0,55 | 0,71 | 0,354 | 5,38E-166 | 4 |
| Pcx      | 3,15E-170 | 0,51 | 0,76 | 0,367 | 5,62E-166 | 4 |
| Ptk2b    | 3,40E-170 | 0,31 | 0,31 | 0,067 | 6,06E-166 | 4 |
| Dctn4    | 7,18E-170 | 0,5  | 0,97 | 0,928 | 1,28E-165 | 4 |
| Fam210b  | 1,14E-169 | 0,53 | 0,62 | 0,269 | 2,02E-165 | 4 |
| Wdr61    | 1,44E-169 | 0,76 | 0,78 | 0,504 | 2,57E-165 | 4 |
| Arhgap21 | 1,99E-168 | 0,57 | 0,85 | 0,616 | 3,54E-164 | 4 |
| Dlgap4   | 3,48E-168 | 0,55 | 0,89 | 0,754 | 6,19E-164 | 4 |
| Cep250   | 3,66E-168 | 0,47 | 0,62 | 0,252 | 6,52E-164 | 4 |
| Gss      | 4,43E-168 | 0,43 | 0,54 | 0,196 | 7,89E-164 | 4 |
| Meis2    | 7,42E-168 | 0,5  | 0,77 | 0,388 | 1,32E-163 | 4 |
| Marcks   | 1,23E-167 | 0,53 | 0,96 | 0,876 | 2,19E-163 | 4 |
| Msi2     | 2,31E-166 | 0,5  | 0,99 | 0,957 | 4,11E-162 | 4 |
| Vkorc1   | 3,59E-166 | 0,64 | 0,86 | 0,694 | 6,39E-162 | 4 |
| Kif1c    | 3,71E-166 | 0,5  | 0,71 | 0,343 | 6,60E-162 | 4 |
| Spsb1    | 2,34E-165 | 0,4  | 0,52 | 0,18  | 4,17E-161 | 4 |
| Eed      | 2,89E-165 | 0,47 | 0,69 | 0,325 | 5,15E-161 | 4 |
| Lrp1     | 6,98E-165 | 0,57 | 0,9  | 0,778 | 1,24E-160 | 4 |
| Rhob     | 1,03E-164 | 0,8  | 0,97 | 0,964 | 1,84E-160 | 4 |
| Calhm2   | 2,16E-164 | 0,41 | 0,57 | 0,218 | 3,85E-160 | 4 |
| Atxn10   | 2,87E-164 | 0,45 | 0,98 | 0,953 | 5,10E-160 | 4 |
| Vangl1   | 7,25E-164 | 0,53 | 0,69 | 0,332 | 1,29E-159 | 4 |
| Nfyb     | 7,42E-164 | 0,5  | 0,7  | 0,333 | 1,32E-159 | 4 |
| Psme4    | 2,00E-163 | 0,56 | 0,89 | 0,735 | 3,57E-159 | 4 |
| Inpp5f   | 8,88E-163 | 0,49 | 0,99 | 0,98  | 1,58E-158 | 4 |
| Spry2    | 1,12E-162 | 0,66 | 0,75 | 0,409 | 1,99E-158 | 4 |
| Ssbp3    | 6,90E-161 | 0,49 | 0,71 | 0,349 | 1,23E-156 | 4 |
| Iffo2    | 2,86E-160 | 0,55 | 0,77 | 0,43  | 5,09E-156 | 4 |
| Mkrn1    | 2,54E-159 | 0,55 | 1    | 0,986 | 4,52E-155 | 4 |
| Nfix     | 1,11E-158 | 0,36 | 0,34 | 0,083 | 1,97E-154 | 4 |
| Commd3   | 1,48E-158 | 0,48 | 0,93 | 0,814 | 2,64E-154 | 4 |
| Vwa1     | 2,80E-157 | 0,34 | 0,44 | 0,138 | 4,98E-153 | 4 |
| Sbk1     | 8,70E-157 | 0,32 | 0,4  | 0,113 | 1,55E-152 | 4 |
| Pbxip1   | 9,07E-157 | 0,49 | 0,98 | 0,93  | 1,62E-152 | 4 |
| Eng      | 3,74E-156 | 0,48 | 0,99 | 0,978 | 6,66E-152 | 4 |
| Ccdc148  | 8,77E-156 | 0,37 | 0,46 | 0,151 | 1,56E-151 | 4 |
| Ptma     | 1,93E-155 | 0,43 | 1    | 1     | 3,44E-151 | 4 |
| Elmo2    | 2,21E-155 | 0,47 | 0,71 | 0,355 | 3,93E-151 | 4 |
| Irf2bp2  | 3,44E-155 | 0,53 | 0,97 | 0,927 | 6,12E-151 | 4 |
| Pom121   | 7,46E-155 | 0,5  | 0,77 | 0,411 | 1,33E-150 | 4 |
| Knop1    | 1,08E-154 | 0,55 | 0,9  | 0,788 | 1,92E-150 | 4 |
| Rps171   | 2,37E-153 | 0,34 | 1    | 1     | 4,23E-149 | 4 |
| Ephx11   | 1,66E-152 | 0,52 | 0,95 | 0,822 | 2,96E-148 | 4 |

|          |           |      |      |       |           |   |
|----------|-----------|------|------|-------|-----------|---|
| Nrep     | 1,88E-152 | 0,57 | 0,84 | 0,597 | 3,34E-148 | 4 |
| Txnl4a   | 1,13E-151 | 0,59 | 0,84 | 0,696 | 2,01E-147 | 4 |
| Lage3    | 3,73E-151 | 0,49 | 0,74 | 0,397 | 6,65E-147 | 4 |
| Akr1b8   | 1,82E-150 | 0,67 | 0,92 | 0,867 | 3,25E-146 | 4 |
| Dopey1   | 2,63E-150 | 0,52 | 0,74 | 0,398 | 4,68E-146 | 4 |
| Kcna6    | 4,54E-150 | 0,3  | 0,35 | 0,093 | 8,08E-146 | 4 |
| Pdia3    | 1,21E-149 | 0,4  | 1    | 0,999 | 2,15E-145 | 4 |
| Pdcd6ip  | 1,32E-149 | 0,46 | 0,93 | 0,842 | 2,35E-145 | 4 |
| Rrp36    | 7,42E-149 | 0,38 | 0,58 | 0,237 | 1,32E-144 | 4 |
| Lif      | 1,00E-148 | 0,39 | 0,39 | 0,112 | 1,78E-144 | 4 |
| Sox21    | 2,08E-148 | 0,57 | 0,69 | 0,329 | 3,71E-144 | 4 |
| Adgra1   | 2,92E-148 | 0,5  | 0,49 | 0,174 | 5,20E-144 | 4 |
| Ppil3    | 4,53E-148 | 0,41 | 0,6  | 0,254 | 8,06E-144 | 4 |
| Zfp688   | 4,95E-148 | 0,4  | 0,61 | 0,257 | 8,81E-144 | 4 |
| Tnpo2    | 6,08E-148 | 0,56 | 0,82 | 0,583 | 1,08E-143 | 4 |
| Golgb1   | 6,17E-148 | 0,48 | 0,99 | 0,963 | 1,10E-143 | 4 |
| Lsm2     | 8,23E-148 | 0,51 | 0,74 | 0,412 | 1,46E-143 | 4 |
| Limk2    | 3,02E-147 | 0,31 | 0,39 | 0,116 | 5,38E-143 | 4 |
| Angpt2   | 4,91E-147 | 0,55 | 0,81 | 0,529 | 8,74E-143 | 4 |
| Hnrnpf   | 7,50E-147 | 0,38 | 1    | 0,983 | 1,34E-142 | 4 |
| Tshz1    | 1,34E-146 | 0,58 | 0,77 | 0,464 | 2,39E-142 | 4 |
| Tnks     | 6,43E-146 | 0,49 | 0,87 | 0,735 | 1,14E-141 | 4 |
| Frmd4a1  | 1,04E-145 | 0,6  | 0,9  | 0,808 | 1,85E-141 | 4 |
| Upp1     | 1,09E-145 | 0,39 | 0,35 | 0,096 | 1,94E-141 | 4 |
| Rchy1    | 2,59E-145 | 0,44 | 0,95 | 0,866 | 4,61E-141 | 4 |
| Man2a1   | 4,57E-145 | 0,51 | 0,64 | 0,301 | 8,13E-141 | 4 |
| Synpo    | 5,07E-145 | 0,43 | 0,62 | 0,271 | 9,02E-141 | 4 |
| Ptprg    | 7,11E-145 | 0,34 | 0,41 | 0,125 | 1,27E-140 | 4 |
| Jmjd1c1  | 1,11E-144 | 0,53 | 0,99 | 0,961 | 1,98E-140 | 4 |
| Rlf      | 5,27E-144 | 0,55 | 0,83 | 0,581 | 9,38E-140 | 4 |
| Rcan1    | 5,40E-144 | 0,59 | 0,6  | 0,274 | 9,61E-140 | 4 |
| Twf1     | 8,23E-144 | 0,42 | 1    | 0,99  | 1,46E-139 | 4 |
| Itm2c    | 2,91E-143 | 0,48 | 0,98 | 0,967 | 5,17E-139 | 4 |
| Runx1    | 3,85E-143 | 0,77 | 0,43 | 0,152 | 6,85E-139 | 4 |
| Eif4ebp2 | 6,23E-143 | 0,51 | 0,83 | 0,603 | 1,11E-138 | 4 |
| Zfp365   | 6,51E-143 | 0,38 | 0,46 | 0,157 | 1,16E-138 | 4 |
| Enc1     | 1,88E-142 | 0,55 | 0,85 | 0,65  | 3,35E-138 | 4 |
| Map2k3   | 2,52E-142 | 0,51 | 0,75 | 0,417 | 4,48E-138 | 4 |
| Ctsd1    | 2,32E-141 | 0,31 | 1    | 1     | 4,13E-137 | 4 |
| Cd91     | 3,06E-141 | 0,46 | 1    | 0,986 | 5,45E-137 | 4 |
| Brix1    | 3,18E-141 | 0,54 | 0,81 | 0,588 | 5,67E-137 | 4 |
| Dgkz     | 4,25E-141 | 0,48 | 0,73 | 0,395 | 7,56E-137 | 4 |
| Hyal1    | 4,72E-141 | 0,4  | 0,5  | 0,19  | 8,40E-137 | 4 |
| Stox21   | 6,66E-141 | 0,41 | 0,99 | 0,936 | 1,19E-136 | 4 |
| Myo9b    | 1,02E-140 | 0,48 | 0,89 | 0,763 | 1,81E-136 | 4 |
| Marcksl1 | 1,38E-140 | 0,58 | 0,88 | 0,75  | 2,45E-136 | 4 |

|          |           |      |      |       |           |   |
|----------|-----------|------|------|-------|-----------|---|
| Cln8     | 1,41E-140 | 0,49 | 0,74 | 0,421 | 2,52E-136 | 4 |
| Map2k4   | 2,34E-140 | 0,44 | 0,66 | 0,32  | 4,16E-136 | 4 |
| Fam160a2 | 3,38E-140 | 0,43 | 0,58 | 0,253 | 6,02E-136 | 4 |
| Prpf8    | 1,62E-139 | 0,5  | 0,85 | 0,677 | 2,89E-135 | 4 |
| Kmt2a    | 1,83E-139 | 0,49 | 0,94 | 0,882 | 3,26E-135 | 4 |
| Plaur    | 8,40E-139 | 0,3  | 0,31 | 0,08  | 1,50E-134 | 4 |
| Gm26735  | 1,86E-138 | 0,57 | 0,88 | 0,72  | 3,31E-134 | 4 |
| Fam214a  | 4,37E-138 | 0,44 | 0,58 | 0,249 | 7,79E-134 | 4 |
| Ubash3b1 | 4,73E-138 | 0,55 | 0,7  | 0,367 | 8,42E-134 | 4 |
| Adk1     | 1,10E-137 | 0,49 | 0,92 | 0,842 | 1,97E-133 | 4 |
| Trim3    | 2,01E-137 | 0,41 | 0,6  | 0,269 | 3,58E-133 | 4 |
| Nradd    | 2,61E-137 | 0,48 | 0,63 | 0,308 | 4,64E-133 | 4 |
| Fam89a1  | 2,99E-137 | 0,57 | 0,74 | 0,433 | 5,33E-133 | 4 |
| Slc39a10 | 3,25E-137 | 0,51 | 0,66 | 0,322 | 5,79E-133 | 4 |
| Nipbl    | 3,98E-137 | 0,4  | 0,99 | 0,966 | 7,09E-133 | 4 |
| Egr11    | 4,27E-137 | 0,8  | 0,99 | 0,96  | 7,60E-133 | 4 |
| Esrra    | 8,09E-137 | 0,44 | 0,69 | 0,35  | 1,44E-132 | 4 |
| Zfp874a  | 1,05E-136 | 0,3  | 0,42 | 0,137 | 1,87E-132 | 4 |
| Slc39a6  | 1,57E-136 | 0,46 | 0,96 | 0,926 | 2,80E-132 | 4 |
| Dgkq     | 2,07E-136 | 0,38 | 0,52 | 0,206 | 3,68E-132 | 4 |
| Osbpl6   | 2,93E-136 | 0,53 | 0,89 | 0,759 | 5,22E-132 | 4 |
| Foxp2    | 5,05E-136 | 0,66 | 0,71 | 0,425 | 8,99E-132 | 4 |
| Scap     | 4,64E-135 | 0,42 | 0,66 | 0,321 | 8,26E-131 | 4 |
| Cdyl     | 8,31E-135 | 0,49 | 0,78 | 0,488 | 1,48E-130 | 4 |
| Zcchc6   | 1,54E-134 | 0,45 | 0,95 | 0,887 | 2,74E-130 | 4 |
| Repin1   | 1,69E-134 | 0,39 | 0,56 | 0,239 | 3,01E-130 | 4 |
| Rnf149   | 3,14E-134 | 0,75 | 0,81 | 0,659 | 5,60E-130 | 4 |
| Atf7ip   | 6,58E-134 | 0,47 | 0,95 | 0,87  | 1,17E-129 | 4 |
| Fkbp9    | 2,93E-133 | 0,47 | 0,95 | 0,926 | 5,21E-129 | 4 |
| Csf11    | 3,20E-133 | 0,47 | 0,69 | 0,354 | 5,70E-129 | 4 |
| Clpb     | 5,79E-133 | 0,48 | 0,69 | 0,371 | 1,03E-128 | 4 |
| Gm15417  | 2,59E-132 | 0,38 | 0,57 | 0,24  | 4,62E-128 | 4 |
| Fbxl20   | 1,10E-131 | 0,43 | 0,7  | 0,37  | 1,97E-127 | 4 |
| Eid1     | 1,23E-131 | 0,43 | 0,98 | 0,931 | 2,18E-127 | 4 |
| Krit11   | 1,80E-131 | 0,43 | 0,97 | 0,905 | 3,20E-127 | 4 |
| Tnfaip21 | 4,03E-131 | 0,79 | 0,88 | 0,784 | 7,17E-127 | 4 |
| Gne      | 2,38E-130 | 0,4  | 0,62 | 0,286 | 4,24E-126 | 4 |
| Gria31   | 2,75E-130 | 0,45 | 0,91 | 0,768 | 4,89E-126 | 4 |
| Jund     | 8,03E-130 | 0,56 | 1    | 0,997 | 1,43E-125 | 4 |
| Stx3     | 8,98E-130 | 0,4  | 0,5  | 0,195 | 1,60E-125 | 4 |
| Iffo1    | 2,48E-129 | 0,41 | 0,58 | 0,254 | 4,41E-125 | 4 |
| Gsk3b    | 2,49E-129 | 0,34 | 1    | 0,997 | 4,44E-125 | 4 |
| Glud1    | 4,69E-129 | 0,48 | 0,93 | 0,878 | 8,36E-125 | 4 |
| Bbc3     | 6,33E-129 | 0,4  | 0,54 | 0,224 | 1,13E-124 | 4 |
| Inf2     | 8,01E-129 | 0,45 | 0,96 | 0,897 | 1,43E-124 | 4 |
| Stk11    | 1,52E-128 | 0,47 | 0,82 | 0,567 | 2,71E-124 | 4 |

|             |           |      |      |       |           |   |
|-------------|-----------|------|------|-------|-----------|---|
| Pkp2        | 1,53E-128 | 0,44 | 0,66 | 0,32  | 2,72E-124 | 4 |
| Gltp        | 5,00E-128 | 0,45 | 0,61 | 0,3   | 8,90E-124 | 4 |
| Rbpj        | 9,95E-128 | 0,59 | 0,81 | 0,641 | 1,77E-123 | 4 |
| Arhgef40    | 1,84E-127 | 0,48 | 0,84 | 0,661 | 3,28E-123 | 4 |
| Eif3f       | 2,22E-127 | 0,4  | 1    | 0,995 | 3,94E-123 | 4 |
| Jun         | 7,84E-127 | 0,65 | 0,99 | 0,972 | 1,40E-122 | 4 |
| Dctn1       | 3,35E-126 | 0,41 | 0,93 | 0,878 | 5,97E-122 | 4 |
| Hpcal1      | 4,28E-126 | 0,48 | 0,86 | 0,71  | 7,63E-122 | 4 |
| Hmox1       | 4,72E-125 | 0,43 | 0,69 | 0,366 | 8,40E-121 | 4 |
| Fam120a     | 5,07E-125 | 0,42 | 0,92 | 0,857 | 9,03E-121 | 4 |
| Ctc1        | 1,13E-124 | 0,4  | 0,6  | 0,273 | 2,01E-120 | 4 |
| S100a101    | 1,54E-124 | 0,56 | 0,97 | 0,951 | 2,75E-120 | 4 |
| Thbs21      | 9,76E-124 | 0,75 | 0,58 | 0,279 | 1,74E-119 | 4 |
| Mast4       | 1,23E-123 | 0,49 | 0,59 | 0,276 | 2,19E-119 | 4 |
| Dbi1        | 1,36E-122 | 0,4  | 1    | 1     | 2,42E-118 | 4 |
| Utrn        | 2,60E-122 | 0,41 | 0,99 | 0,967 | 4,62E-118 | 4 |
| Cyba        | 3,28E-122 | 0,42 | 0,99 | 0,985 | 5,85E-118 | 4 |
| Ogfrl1      | 2,43E-121 | 0,35 | 0,44 | 0,163 | 4,33E-117 | 4 |
| 500009L16Ri | 4,51E-121 | 0,39 | 0,52 | 0,221 | 8,03E-117 | 4 |
| Dab2ip      | 5,47E-121 | 0,46 | 0,86 | 0,734 | 9,74E-117 | 4 |
| Frmd8       | 9,97E-121 | 0,48 | 0,8  | 0,586 | 1,78E-116 | 4 |
| Sdhaf1      | 2,87E-120 | 0,39 | 0,58 | 0,276 | 5,11E-116 | 4 |
| Bet1l       | 6,38E-120 | 0,48 | 0,74 | 0,455 | 1,14E-115 | 4 |
| Ddr1        | 1,02E-119 | 0,42 | 0,88 | 0,738 | 1,81E-115 | 4 |
| Sh3yl1      | 1,14E-119 | 0,44 | 0,57 | 0,272 | 2,03E-115 | 4 |
| Mier1       | 1,45E-119 | 0,4  | 0,95 | 0,863 | 2,58E-115 | 4 |
| Prps2       | 2,28E-119 | 0,45 | 0,76 | 0,485 | 4,05E-115 | 4 |
| Rnf4        | 4,08E-119 | 0,42 | 0,87 | 0,697 | 7,27E-115 | 4 |
| Rala        | 4,32E-119 | 0,47 | 0,85 | 0,745 | 7,69E-115 | 4 |
| Fah         | 6,58E-119 | 0,3  | 0,4  | 0,137 | 1,17E-114 | 4 |
| Exoc2       | 6,69E-119 | 0,42 | 0,65 | 0,335 | 1,19E-114 | 4 |
| Klh22       | 2,04E-118 | 0,43 | 0,74 | 0,437 | 3,62E-114 | 4 |
| Apc         | 2,14E-118 | 0,4  | 0,95 | 0,883 | 3,82E-114 | 4 |
| Tpd52       | 2,69E-118 | 0,44 | 0,75 | 0,452 | 4,78E-114 | 4 |
| Ddit4       | 5,09E-118 | 0,36 | 0,55 | 0,235 | 9,06E-114 | 4 |
| Otud4       | 5,29E-118 | 0,48 | 0,81 | 0,579 | 9,42E-114 | 4 |
| Plxna2      | 6,05E-118 | 0,42 | 0,42 | 0,149 | 1,08E-113 | 4 |
| Usp2        | 8,47E-118 | 0,43 | 0,73 | 0,421 | 1,51E-113 | 4 |
| Ybx1        | 3,52E-117 | 0,35 | 1    | 0,999 | 6,26E-113 | 4 |
| Pacs1       | 9,54E-117 | 0,44 | 0,63 | 0,336 | 1,70E-112 | 4 |
| Ccdc86      | 1,05E-116 | 0,4  | 0,52 | 0,232 | 1,86E-112 | 4 |
| Slc33a1     | 1,09E-116 | 0,37 | 0,54 | 0,24  | 1,94E-112 | 4 |
| Plec1       | 2,64E-116 | 0,49 | 0,97 | 0,953 | 4,70E-112 | 4 |
| Il6ra       | 3,26E-116 | 0,44 | 0,46 | 0,186 | 5,80E-112 | 4 |
| Pak2        | 7,09E-115 | 0,38 | 0,97 | 0,944 | 1,26E-110 | 4 |
| Eno2        | 1,15E-114 | 0,34 | 0,58 | 0,263 | 2,04E-110 | 4 |



|           |           |      |      |       |           |   |
|-----------|-----------|------|------|-------|-----------|---|
| Wdr91     | 1,42E-114 | 0,43 | 0,95 | 0,891 | 2,52E-110 | 4 |
| Rpl9      | 5,55E-114 | 0,35 | 1    | 1     | 9,88E-110 | 4 |
| Ubc       | 5,69E-114 | 0,39 | 1    | 1     | 1,01E-109 | 4 |
| Sema6d1   | 9,72E-114 | 0,63 | 0,69 | 0,405 | 1,73E-109 | 4 |
| Bicap     | 1,09E-113 | 0,35 | 0,56 | 0,253 | 1,95E-109 | 4 |
| Bmp11     | 1,47E-113 | 0,44 | 0,7  | 0,388 | 2,61E-109 | 4 |
| Camsap1   | 1,64E-113 | 0,43 | 0,72 | 0,42  | 2,93E-109 | 4 |
| Csdc2     | 3,81E-113 | 0,33 | 0,32 | 0,096 | 6,79E-109 | 4 |
| Npepps    | 1,01E-112 | 0,37 | 0,92 | 0,804 | 1,80E-108 | 4 |
| Map4k41   | 2,06E-112 | 0,35 | 1    | 0,984 | 3,66E-108 | 4 |
| Bach1     | 2,15E-112 | 0,45 | 0,75 | 0,484 | 3,83E-108 | 4 |
| Capg      | 4,23E-112 | 0,44 | 0,97 | 0,954 | 7,54E-108 | 4 |
| Agpat5    | 1,08E-111 | 0,42 | 0,84 | 0,661 | 1,91E-107 | 4 |
| Cttnbp2nl | 1,68E-111 | 0,45 | 0,84 | 0,709 | 3,00E-107 | 4 |
| Plod2     | 1,80E-111 | 0,39 | 0,94 | 0,843 | 3,21E-107 | 4 |
| Ado       | 3,95E-111 | 0,33 | 0,51 | 0,224 | 7,03E-107 | 4 |
| Pard6g    | 4,12E-111 | 0,46 | 0,74 | 0,473 | 7,33E-107 | 4 |
| Akap9     | 4,39E-111 | 0,39 | 0,99 | 0,965 | 7,81E-107 | 4 |
| Ythdc1    | 1,11E-110 | 0,43 | 0,95 | 0,894 | 1,97E-106 | 4 |
| Ndufc2    | 1,45E-110 | 0,39 | 0,99 | 0,961 | 2,58E-106 | 4 |
| Eif4ebp1  | 2,99E-110 | 0,46 | 0,73 | 0,445 | 5,32E-106 | 4 |
| Fam214b   | 3,92E-110 | 0,36 | 0,56 | 0,263 | 6,99E-106 | 4 |
| Zcchc111  | 4,29E-110 | 0,42 | 0,86 | 0,716 | 7,64E-106 | 4 |
| Akr1b7    | 5,49E-110 | 0,53 | 1    | 0,994 | 9,77E-106 | 4 |
| Fam168a   | 6,45E-110 | 0,41 | 0,87 | 0,763 | 1,15E-105 | 4 |
| F8a       | 7,70E-110 | 0,35 | 0,62 | 0,301 | 1,37E-105 | 4 |
| Rnf181    | 1,32E-109 | 0,41 | 0,72 | 0,422 | 2,34E-105 | 4 |
| Rbms1     | 5,44E-109 | 0,41 | 0,94 | 0,862 | 9,69E-105 | 4 |
| Bcl10     | 5,85E-109 | 0,45 | 0,74 | 0,466 | 1,04E-104 | 4 |
| Rack1     | 7,55E-109 | 0,32 | 1    | 1     | 1,34E-104 | 4 |
| Mrps6     | 9,10E-109 | 0,45 | 0,81 | 0,619 | 1,62E-104 | 4 |
| Tor1b     | 9,25E-109 | 0,48 | 0,8  | 0,617 | 1,65E-104 | 4 |
| Hspg2     | 1,64E-108 | 0,47 | 0,76 | 0,525 | 2,93E-104 | 4 |
| Appl1     | 4,48E-108 | 0,51 | 0,81 | 0,637 | 7,98E-104 | 4 |
| Lpin1     | 5,00E-108 | 0,43 | 0,94 | 0,901 | 8,90E-104 | 4 |
| Msn       | 6,33E-108 | 0,39 | 0,99 | 0,994 | 1,13E-103 | 4 |
| Cltb      | 1,25E-107 | 0,48 | 0,91 | 0,895 | 2,23E-103 | 4 |
| Parp101   | 2,21E-107 | 0,35 | 0,55 | 0,254 | 3,93E-103 | 4 |
| Map7      | 2,41E-107 | 0,37 | 0,55 | 0,259 | 4,29E-103 | 4 |
| Pcnp      | 9,91E-107 | 0,36 | 0,97 | 0,929 | 1,76E-102 | 4 |
| Zwint     | 1,39E-106 | 0,48 | 0,76 | 0,523 | 2,48E-102 | 4 |
| Med13l    | 1,76E-106 | 0,39 | 0,91 | 0,827 | 3,14E-102 | 4 |
| Dalrd3    | 1,84E-106 | 0,36 | 0,6  | 0,301 | 3,28E-102 | 4 |
| Spr       | 2,12E-106 | 0,46 | 0,69 | 0,414 | 3,78E-102 | 4 |
| Rest      | 7,92E-106 | 0,46 | 0,86 | 0,755 | 1,41E-101 | 4 |
| Fam126a   | 1,29E-105 | 0,37 | 0,54 | 0,25  | 2,30E-101 | 4 |

|          |           |      |      |       |           |   |
|----------|-----------|------|------|-------|-----------|---|
| Dlg5     | 2,56E-105 | 0,37 | 0,58 | 0,292 | 4,55E-101 | 4 |
| Nbea1    | 7,22E-105 | 0,46 | 0,85 | 0,714 | 1,29E-100 | 4 |
| Mgat2    | 7,93E-105 | 0,42 | 0,78 | 0,555 | 1,41E-100 | 4 |
| Pros1    | 8,28E-105 | 0,43 | 0,98 | 0,964 | 1,47E-100 | 4 |
| Ywhag    | 1,89E-104 | 0,4  | 0,93 | 0,897 | 3,36E-100 | 4 |
| Rabgap1  | 2,02E-104 | 0,38 | 0,95 | 0,896 | 3,60E-100 | 4 |
| Atpif1   | 3,68E-104 | 0,33 | 1    | 0,986 | 6,56E-100 | 4 |
| Npr2     | 6,29E-104 | 0,4  | 0,69 | 0,404 | 1,12E-99  | 4 |
| Pak1     | 6,48E-104 | 0,34 | 0,51 | 0,221 | 1,15E-99  | 4 |
| Mmp2     | 9,02E-104 | 0,41 | 0,93 | 0,834 | 1,61E-99  | 4 |
| Nsmaf    | 1,89E-103 | 0,33 | 0,54 | 0,25  | 3,37E-99  | 4 |
| Sidt2    | 2,15E-103 | 0,43 | 0,78 | 0,539 | 3,83E-99  | 4 |
| Sin3b    | 3,94E-103 | 0,42 | 0,99 | 0,98  | 7,02E-99  | 4 |
| Cxxc41   | 5,75E-103 | 0,39 | 0,66 | 0,329 | 1,02E-98  | 4 |
| Flrt31   | 5,91E-103 | 0,6  | 0,76 | 0,57  | 1,05E-98  | 4 |
| Smad2    | 1,04E-102 | 0,37 | 0,68 | 0,378 | 1,86E-98  | 4 |
| Ptbp3    | 1,09E-102 | 0,41 | 0,93 | 0,884 | 1,94E-98  | 4 |
| Slc12a4  | 1,48E-102 | 0,43 | 0,76 | 0,526 | 2,63E-98  | 4 |
| Rorb     | 1,77E-102 | 0,55 | 0,97 | 0,936 | 3,15E-98  | 4 |
| Ino80b   | 5,53E-102 | 0,44 | 0,72 | 0,465 | 9,85E-98  | 4 |
| Mrip     | 4,08E-101 | 0,37 | 0,95 | 0,91  | 7,26E-97  | 4 |
| Mmd      | 6,07E-101 | 0,46 | 0,49 | 0,214 | 1,08E-96  | 4 |
| Nat6     | 9,40E-101 | 0,37 | 0,55 | 0,267 | 1,67E-96  | 4 |
| Pvt1     | 3,00E-100 | 0,36 | 0,64 | 0,342 | 5,35E-96  | 4 |
| Klhl21   | 6,69E-100 | 0,38 | 0,66 | 0,365 | 1,19E-95  | 4 |
| Hectd1   | 9,33E-100 | 0,39 | 0,93 | 0,896 | 1,66E-95  | 4 |
| Tmem19   | 1,19E-99  | 0,32 | 0,53 | 0,243 | 2,12E-95  | 4 |
| Sh3pxd2a | 2,06E-99  | 0,39 | 0,99 | 0,95  | 3,67E-95  | 4 |
| Gas7     | 6,84E-99  | 0,39 | 0,91 | 0,846 | 1,22E-94  | 4 |
| Cic      | 1,13E-98  | 0,41 | 0,76 | 0,545 | 2,00E-94  | 4 |
| Dennd5a  | 5,74E-98  | 0,31 | 1    | 0,989 | 1,02E-93  | 4 |
| Bmpr2    | 6,02E-98  | 0,37 | 0,93 | 0,864 | 1,07E-93  | 4 |
| Itpripl2 | 5,30E-97  | 0,36 | 0,94 | 0,893 | 9,44E-93  | 4 |
| Mob1b1   | 6,07E-96  | 0,4  | 0,92 | 0,837 | 1,08E-91  | 4 |
| Ric1     | 8,92E-96  | 0,36 | 0,61 | 0,324 | 1,59E-91  | 4 |
| Zmiz1    | 4,14E-95  | 0,34 | 0,99 | 0,986 | 7,37E-91  | 4 |
| Nomo1    | 5,48E-95  | 0,35 | 0,62 | 0,337 | 9,76E-91  | 4 |
| Fam129b  | 1,08E-94  | 0,4  | 0,77 | 0,573 | 1,92E-90  | 4 |
| Leng1    | 1,41E-94  | 0,35 | 0,52 | 0,246 | 2,51E-90  | 4 |
| Izumo4   | 2,95E-94  | 0,31 | 0,5  | 0,228 | 5,24E-90  | 4 |
| Hmgn1    | 3,29E-94  | 0,34 | 1    | 0,991 | 5,86E-90  | 4 |
| Tmem120a | 9,44E-94  | 0,37 | 0,65 | 0,368 | 1,68E-89  | 4 |
| Nwd2     | 1,06E-93  | 0,52 | 0,94 | 0,856 | 1,89E-89  | 4 |
| Srxn1    | 1,53E-93  | 0,47 | 0,6  | 0,339 | 2,73E-89  | 4 |
| Aldh1a31 | 1,96E-93  | 1,03 | 0,54 | 0,286 | 3,48E-89  | 4 |
| Stab1    | 2,78E-93  | 0,4  | 0,4  | 0,164 | 4,96E-89  | 4 |

|           |          |      |      |       |          |   |
|-----------|----------|------|------|-------|----------|---|
| Ldhb      | 3,35E-93 | 0,36 | 1    | 0,99  | 5,96E-89 | 4 |
| Agap3     | 4,76E-93 | 0,34 | 0,59 | 0,309 | 8,47E-89 | 4 |
| Arap2     | 5,14E-93 | 0,31 | 1    | 0,999 | 9,16E-89 | 4 |
| Greb1     | 1,48E-92 | 0,33 | 0,52 | 0,241 | 2,63E-88 | 4 |
| Alcam1    | 1,78E-92 | 0,47 | 0,99 | 0,966 | 3,17E-88 | 4 |
| Mfsd1     | 1,95E-92 | 0,4  | 0,77 | 0,56  | 3,48E-88 | 4 |
| Rfx7      | 3,51E-92 | 0,39 | 0,8  | 0,585 | 6,25E-88 | 4 |
| Mex3b     | 6,08E-92 | 0,39 | 0,61 | 0,326 | 1,08E-87 | 4 |
| Reep3     | 1,23E-91 | 0,33 | 0,98 | 0,961 | 2,20E-87 | 4 |
| Emp3      | 2,64E-91 | 0,32 | 1    | 0,999 | 4,71E-87 | 4 |
| Serpinh1  | 1,99E-90 | 0,33 | 0,99 | 0,962 | 3,55E-86 | 4 |
| Chic2     | 2,39E-90 | 0,38 | 0,86 | 0,737 | 4,26E-86 | 4 |
| Fam32a    | 2,41E-90 | 0,33 | 0,93 | 0,896 | 4,29E-86 | 4 |
| Mkl2      | 3,93E-90 | 0,35 | 0,69 | 0,408 | 6,99E-86 | 4 |
| Vmp1      | 8,19E-90 | 0,7  | 0,76 | 0,613 | 1,46E-85 | 4 |
| Nubp1     | 9,48E-90 | 0,35 | 0,68 | 0,406 | 1,69E-85 | 4 |
| Fam124a   | 9,70E-90 | 0,4  | 0,67 | 0,38  | 1,73E-85 | 4 |
| Add2      | 1,54E-89 | 0,32 | 0,36 | 0,138 | 2,74E-85 | 4 |
| Hist1h4h  | 2,89E-89 | 0,36 | 0,47 | 0,212 | 5,14E-85 | 4 |
| Egr2      | 2,96E-89 | 0,34 | 0,44 | 0,188 | 5,27E-85 | 4 |
| Ssna1     | 3,47E-89 | 0,4  | 0,8  | 0,643 | 6,19E-85 | 4 |
| Rcbtb1    | 9,28E-89 | 0,37 | 0,74 | 0,495 | 1,65E-84 | 4 |
| Taldo1    | 1,29E-88 | 0,57 | 0,76 | 0,621 | 2,30E-84 | 4 |
| Scarb2    | 5,85E-88 | 0,33 | 0,97 | 0,945 | 1,04E-83 | 4 |
| Cep164    | 1,08E-87 | 0,38 | 0,87 | 0,767 | 1,92E-83 | 4 |
| D17Wsu92e | 1,29E-87 | 0,38 | 0,84 | 0,729 | 2,30E-83 | 4 |
| Vps28     | 1,73E-87 | 0,35 | 0,97 | 0,941 | 3,07E-83 | 4 |
| Nudt3     | 2,91E-87 | 0,34 | 0,87 | 0,786 | 5,18E-83 | 4 |
| Zfp281    | 7,96E-87 | 0,36 | 0,63 | 0,352 | 1,42E-82 | 4 |
| Rab18     | 1,38E-86 | 0,36 | 0,96 | 0,948 | 2,46E-82 | 4 |
| Foxo3     | 1,65E-86 | 0,34 | 0,64 | 0,362 | 2,93E-82 | 4 |
| Rasal2    | 1,68E-86 | 0,34 | 0,57 | 0,3   | 2,98E-82 | 4 |
| Lasp1     | 2,92E-86 | 0,51 | 0,7  | 0,488 | 5,19E-82 | 4 |
| Thoc7     | 4,91E-86 | 0,34 | 0,91 | 0,84  | 8,74E-82 | 4 |
| Slc35e4   | 8,88E-86 | 0,35 | 0,6  | 0,328 | 1,58E-81 | 4 |
| Ski       | 9,05E-86 | 0,36 | 0,86 | 0,753 | 1,61E-81 | 4 |
| Capzb     | 9,39E-86 | 0,31 | 0,94 | 0,911 | 1,67E-81 | 4 |
| Serpinb6a | 1,39E-85 | 0,39 | 0,91 | 0,88  | 2,48E-81 | 4 |
| Fbxw7     | 2,26E-85 | 0,36 | 0,63 | 0,364 | 4,02E-81 | 4 |
| Smad7     | 4,37E-85 | 0,32 | 0,51 | 0,251 | 7,78E-81 | 4 |
| Yif1a     | 7,82E-85 | 0,41 | 0,74 | 0,55  | 1,39E-80 | 4 |
| Tfap2a    | 1,59E-84 | 0,4  | 0,53 | 0,274 | 2,83E-80 | 4 |
| Cap1      | 4,49E-84 | 0,4  | 0,78 | 0,622 | 7,99E-80 | 4 |
| Slc24a5   | 5,02E-84 | 0,65 | 0,78 | 0,697 | 8,94E-80 | 4 |
| Dennd2a1  | 6,90E-84 | 0,41 | 0,99 | 0,968 | 1,23E-79 | 4 |
| Tnfaip1   | 2,64E-83 | 0,33 | 0,66 | 0,39  | 4,70E-79 | 4 |

|          |          |      |      |       |          |   |
|----------|----------|------|------|-------|----------|---|
| Hipk1    | 3,31E-83 | 0,38 | 0,88 | 0,802 | 5,89E-79 | 4 |
| Eef1b2   | 4,23E-83 | 0,32 | 1    | 0,999 | 7,53E-79 | 4 |
| Herc2    | 4,58E-83 | 0,35 | 0,93 | 0,87  | 8,15E-79 | 4 |
| Gria4    | 9,70E-83 | 0,37 | 0,69 | 0,407 | 1,73E-78 | 4 |
| Phf8     | 1,64E-82 | 0,31 | 0,5  | 0,245 | 2,92E-78 | 4 |
| Sash1    | 2,01E-82 | 0,3  | 0,99 | 0,978 | 3,57E-78 | 4 |
| Acap2    | 3,88E-82 | 0,36 | 0,83 | 0,706 | 6,91E-78 | 4 |
| Zbtb43   | 7,57E-82 | 0,34 | 0,68 | 0,405 | 1,35E-77 | 4 |
| Hexim1   | 8,98E-82 | 0,37 | 0,83 | 0,736 | 1,60E-77 | 4 |
| Dusp5    | 1,22E-81 | 0,5  | 0,4  | 0,177 | 2,18E-77 | 4 |
| Bcl2l11  | 4,70E-81 | 0,41 | 0,8  | 0,59  | 8,36E-77 | 4 |
| Arhgef3  | 7,73E-81 | 0,31 | 0,45 | 0,204 | 1,38E-76 | 4 |
| Folr21   | 9,59E-81 | 0,46 | 0,47 | 0,221 | 1,71E-76 | 4 |
| Mapk8ip3 | 9,77E-81 | 0,35 | 0,79 | 0,577 | 1,74E-76 | 4 |
| Mboat7   | 1,04E-80 | 0,32 | 0,69 | 0,412 | 1,85E-76 | 4 |
| Prkd3    | 2,52E-80 | 0,38 | 0,86 | 0,759 | 4,48E-76 | 4 |
| Agtpbp1  | 6,62E-80 | 0,3  | 0,58 | 0,31  | 1,18E-75 | 4 |
| Adgre5   | 6,62E-80 | 0,41 | 0,77 | 0,596 | 1,18E-75 | 4 |
| Dda1     | 7,99E-80 | 0,36 | 0,87 | 0,821 | 1,42E-75 | 4 |
| Slc25a17 | 8,19E-80 | 0,34 | 0,63 | 0,373 | 1,46E-75 | 4 |
| Creb5    | 1,54E-79 | 0,38 | 0,93 | 0,861 | 2,75E-75 | 4 |
| Nr3c1    | 5,72E-79 | 0,35 | 0,86 | 0,783 | 1,02E-74 | 4 |
| Leo1     | 9,00E-79 | 0,32 | 0,56 | 0,299 | 1,60E-74 | 4 |
| Abca1    | 9,49E-79 | 0,36 | 0,91 | 0,825 | 1,69E-74 | 4 |
| Gigyf2   | 2,63E-78 | 0,38 | 0,87 | 0,774 | 4,68E-74 | 4 |
| Rapgef6  | 2,88E-78 | 0,36 | 0,77 | 0,571 | 5,12E-74 | 4 |
| Ctsh     | 6,55E-78 | 0,38 | 0,95 | 0,923 | 1,17E-73 | 4 |
| Snx16    | 1,27E-77 | 0,3  | 0,49 | 0,247 | 2,26E-73 | 4 |
| Abcf2    | 1,93E-77 | 0,34 | 0,69 | 0,434 | 3,43E-73 | 4 |
| Ppp1r15a | 3,10E-77 | 0,44 | 0,79 | 0,678 | 5,52E-73 | 4 |
| Yipf3    | 4,02E-77 | 0,35 | 0,86 | 0,797 | 7,15E-73 | 4 |
| Id2      | 4,69E-77 | 0,31 | 0,42 | 0,184 | 8,34E-73 | 4 |
| Gstk1    | 7,85E-76 | 0,35 | 0,5  | 0,262 | 1,40E-71 | 4 |
| Ccdc88a  | 1,44E-75 | 0,34 | 0,88 | 0,798 | 2,57E-71 | 4 |
| Yy1      | 2,69E-75 | 0,31 | 0,94 | 0,92  | 4,79E-71 | 4 |
| Fam53b   | 4,44E-75 | 0,33 | 0,89 | 0,794 | 7,91E-71 | 4 |
| Ppp1r14c | 4,76E-75 | 0,33 | 0,49 | 0,252 | 8,48E-71 | 4 |
| Dcaf7    | 1,12E-74 | 0,34 | 0,67 | 0,428 | 1,99E-70 | 4 |
| Mbd5     | 1,14E-74 | 0,31 | 0,67 | 0,408 | 2,03E-70 | 4 |
| Xrn2     | 2,12E-74 | 0,31 | 0,98 | 0,965 | 3,77E-70 | 4 |
| Hdac5    | 2,32E-74 | 0,33 | 0,58 | 0,33  | 4,12E-70 | 4 |
| Ccdc34   | 4,94E-74 | 0,32 | 0,78 | 0,588 | 8,80E-70 | 4 |
| Zfp6441  | 6,91E-74 | 0,33 | 0,92 | 0,855 | 1,23E-69 | 4 |
| Ghr      | 1,13E-73 | 0,41 | 0,38 | 0,172 | 2,02E-69 | 4 |
| Dbn1     | 2,52E-73 | 0,32 | 0,55 | 0,303 | 4,49E-69 | 4 |
| Agrn     | 3,04E-73 | 0,33 | 0,73 | 0,481 | 5,41E-69 | 4 |

|            |          |      |      |       |          |   |
|------------|----------|------|------|-------|----------|---|
| Fem1b      | 3,61E-73 | 0,32 | 0,52 | 0,278 | 6,43E-69 | 4 |
| Sap30bp    | 7,71E-73 | 0,34 | 0,54 | 0,303 | 1,37E-68 | 4 |
| Arrdc3     | 9,43E-73 | 0,35 | 0,55 | 0,296 | 1,68E-68 | 4 |
| Ptbp1      | 1,17E-72 | 0,31 | 0,88 | 0,793 | 2,09E-68 | 4 |
| Eps15      | 2,10E-72 | 0,35 | 0,68 | 0,43  | 3,73E-68 | 4 |
| Me21       | 2,31E-72 | 0,42 | 0,61 | 0,374 | 4,12E-68 | 4 |
| Pcnx1      | 2,79E-72 | 0,38 | 0,89 | 0,826 | 4,98E-68 | 4 |
| Fam135a    | 2,93E-72 | 0,33 | 0,6  | 0,35  | 5,22E-68 | 4 |
| Pxn        | 4,14E-72 | 0,37 | 0,77 | 0,631 | 7,36E-68 | 4 |
| Prkag1     | 5,01E-72 | 0,32 | 0,68 | 0,425 | 8,92E-68 | 4 |
| Ppp1r35    | 8,46E-72 | 0,3  | 0,54 | 0,302 | 1,51E-67 | 4 |
| Rab21      | 8,97E-72 | 0,35 | 0,84 | 0,76  | 1,60E-67 | 4 |
| Cpd1       | 1,37E-71 | 0,3  | 0,95 | 0,891 | 2,45E-67 | 4 |
| Ccser2     | 1,83E-71 | 0,38 | 0,84 | 0,76  | 3,26E-67 | 4 |
| Slc6a6     | 8,12E-71 | 0,35 | 0,85 | 0,761 | 1,45E-66 | 4 |
| Txndc9     | 8,80E-71 | 0,34 | 0,85 | 0,771 | 1,57E-66 | 4 |
| Nr4a21     | 1,54E-70 | 0,36 | 0,57 | 0,318 | 2,74E-66 | 4 |
| Mtus11     | 1,67E-70 | 0,41 | 0,75 | 0,589 | 2,97E-66 | 4 |
| Nr1d1      | 3,37E-70 | 0,32 | 0,61 | 0,363 | 6,00E-66 | 4 |
| Msl3       | 4,03E-70 | 0,31 | 0,61 | 0,368 | 7,17E-66 | 4 |
| Sipa1l2    | 4,95E-70 | 0,34 | 0,63 | 0,384 | 8,81E-66 | 4 |
| Rnd31      | 6,11E-70 | 0,39 | 0,61 | 0,357 | 1,09E-65 | 4 |
| Zfhx41     | 9,81E-70 | 0,33 | 0,92 | 0,888 | 1,75E-65 | 4 |
| Edem1      | 1,09E-69 | 0,31 | 0,63 | 0,381 | 1,93E-65 | 4 |
| Kdm6b      | 1,13E-69 | 0,33 | 0,86 | 0,782 | 2,01E-65 | 4 |
| Poglut1    | 3,95E-69 | 0,32 | 0,59 | 0,351 | 7,04E-65 | 4 |
| Wwtr1      | 7,23E-69 | 0,38 | 0,79 | 0,697 | 1,29E-64 | 4 |
| Dmwd       | 1,38E-68 | 0,35 | 0,76 | 0,604 | 2,46E-64 | 4 |
| 430042O09R | 1,84E-68 | 0,34 | 0,56 | 0,318 | 3,27E-64 | 4 |
| Gxylt1     | 3,35E-68 | 0,33 | 0,81 | 0,643 | 5,96E-64 | 4 |
| Tmx41      | 4,34E-68 | 0,49 | 0,93 | 0,885 | 7,73E-64 | 4 |
| Ssbp2      | 1,24E-67 | 0,3  | 0,55 | 0,311 | 2,21E-63 | 4 |
| Prpf19     | 1,29E-67 | 0,31 | 0,85 | 0,766 | 2,29E-63 | 4 |
| Eif5b      | 1,32E-67 | 0,32 | 0,99 | 0,988 | 2,35E-63 | 4 |
| Nudt22     | 1,34E-67 | 0,3  | 0,44 | 0,223 | 2,39E-63 | 4 |
| Shisa4     | 3,85E-67 | 0,36 | 0,7  | 0,487 | 6,86E-63 | 4 |
| Ckap4      | 7,63E-67 | 0,37 | 0,88 | 0,851 | 1,36E-62 | 4 |
| Cdkn2c     | 1,35E-66 | 0,33 | 0,67 | 0,431 | 2,40E-62 | 4 |
| Gclc       | 2,42E-66 | 0,41 | 0,62 | 0,382 | 4,31E-62 | 4 |
| Zfhx3      | 5,33E-66 | 0,3  | 0,98 | 0,962 | 9,48E-62 | 4 |
| Rnmt       | 1,95E-65 | 0,33 | 0,71 | 0,49  | 3,47E-61 | 4 |
| Garnl3     | 3,15E-65 | 0,32 | 0,57 | 0,332 | 5,62E-61 | 4 |
| Uhrf21     | 3,40E-65 | 0,39 | 0,85 | 0,78  | 6,06E-61 | 4 |
| Bfsp2      | 6,04E-65 | 0,36 | 0,76 | 0,599 | 1,08E-60 | 4 |
| Cbfb       | 1,52E-64 | 0,3  | 0,92 | 0,887 | 2,71E-60 | 4 |
| Tnfrsf12a  | 4,61E-64 | 0,32 | 0,59 | 0,34  | 8,20E-60 | 4 |

|          |          |      |      |       |          |   |
|----------|----------|------|------|-------|----------|---|
| Pnrc1    | 6,65E-64 | 0,33 | 0,91 | 0,894 | 1,18E-59 | 4 |
| Rbbp6    | 1,41E-63 | 0,33 | 0,96 | 0,923 | 2,51E-59 | 4 |
| Tgfb21   | 2,01E-63 | 0,37 | 0,75 | 0,554 | 3,57E-59 | 4 |
| Map4k3   | 2,10E-63 | 0,31 | 0,7  | 0,484 | 3,74E-59 | 4 |
| Tbc1d24  | 2,60E-63 | 0,31 | 0,65 | 0,408 | 4,63E-59 | 4 |
| Mib1     | 4,02E-63 | 0,32 | 0,88 | 0,832 | 7,16E-59 | 4 |
| Ubald2   | 9,86E-63 | 0,31 | 0,83 | 0,757 | 1,75E-58 | 4 |
| Fos1     | 1,19E-62 | 0,54 | 0,99 | 0,97  | 2,12E-58 | 4 |
| Gsn1     | 4,32E-62 | 0,34 | 1    | 0,996 | 7,69E-58 | 4 |
| Col18a1  | 1,23E-61 | 0,39 | 0,92 | 0,898 | 2,19E-57 | 4 |
| Adh5     | 2,51E-61 | 0,33 | 0,81 | 0,731 | 4,47E-57 | 4 |
| H2-Eb11  | 5,31E-61 | 0,48 | 0,68 | 0,505 | 9,45E-57 | 4 |
| Cadm1    | 5,87E-61 | 0,4  | 0,49 | 0,275 | 1,05E-56 | 4 |
| Hipk3    | 8,24E-61 | 0,3  | 0,66 | 0,428 | 1,47E-56 | 4 |
| Pdlim4   | 1,99E-60 | 0,34 | 0,34 | 0,151 | 3,55E-56 | 4 |
| Pvr      | 2,64E-60 | 0,34 | 0,67 | 0,463 | 4,70E-56 | 4 |
| Tuba1c   | 6,20E-59 | 0,36 | 0,76 | 0,621 | 1,10E-54 | 4 |
| Odc1     | 9,28E-59 | 0,33 | 0,87 | 0,829 | 1,65E-54 | 4 |
| Ppil2    | 6,65E-58 | 0,3  | 0,65 | 0,431 | 1,18E-53 | 4 |
| Psmc1    | 7,56E-58 | 0,31 | 0,81 | 0,739 | 1,35E-53 | 4 |
| Junb     | 1,25E-57 | 0,43 | 0,97 | 0,952 | 2,22E-53 | 4 |
| Klf9     | 4,25E-57 | 0,34 | 0,97 | 0,962 | 7,56E-53 | 4 |
| Acbd5    | 3,42E-56 | 0,31 | 0,85 | 0,786 | 6,10E-52 | 4 |
| Mcrip1   | 3,98E-56 | 0,32 | 0,73 | 0,594 | 7,08E-52 | 4 |
| S100a61  | 4,15E-56 | 0,47 | 0,99 | 0,991 | 7,39E-52 | 4 |
| Oaf      | 6,81E-56 | 0,36 | 0,59 | 0,378 | 1,21E-51 | 4 |
| Prag1    | 6,97E-56 | 0,31 | 0,68 | 0,483 | 1,24E-51 | 4 |
| Spty2d1  | 2,58E-55 | 0,31 | 0,86 | 0,803 | 4,60E-51 | 4 |
| Igsf3    | 1,36E-54 | 0,34 | 0,84 | 0,762 | 2,43E-50 | 4 |
| Mid1ip1  | 4,64E-54 | 0,3  | 0,72 | 0,554 | 8,27E-50 | 4 |
| Sh3bgrl3 | 9,79E-54 | 0,31 | 0,89 | 0,885 | 1,74E-49 | 4 |
| Stim11   | 1,22E-53 | 0,34 | 0,81 | 0,76  | 2,18E-49 | 4 |
| Pold4    | 1,27E-53 | 0,49 | 0,63 | 0,465 | 2,26E-49 | 4 |
| Egr3     | 1,54E-53 | 0,3  | 0,46 | 0,245 | 2,74E-49 | 4 |
| Jag1     | 3,93E-53 | 0,37 | 0,39 | 0,198 | 6,99E-49 | 4 |
| Acvrl1   | 5,75E-53 | 0,3  | 0,55 | 0,348 | 1,02E-48 | 4 |
| Ptp4a3   | 3,21E-52 | 0,4  | 0,41 | 0,224 | 5,72E-48 | 4 |
| Rgmb     | 3,36E-52 | 0,37 | 0,79 | 0,72  | 5,98E-48 | 4 |
| Nsrp1    | 1,14E-50 | 0,3  | 0,72 | 0,556 | 2,03E-46 | 4 |
| Ahnak1   | 3,06E-50 | 0,49 | 0,76 | 0,654 | 5,44E-46 | 4 |
| Cited2   | 5,46E-50 | 0,42 | 0,88 | 0,857 | 9,72E-46 | 4 |
| Sf3b4    | 2,12E-48 | 0,3  | 0,7  | 0,558 | 3,77E-44 | 4 |
| Trio     | 4,76E-48 | 0,3  | 0,88 | 0,827 | 8,48E-44 | 4 |
| Rasa1    | 7,40E-48 | 0,4  | 0,75 | 0,66  | 1,32E-43 | 4 |
| Cstb     | 1,48E-47 | 0,32 | 0,9  | 0,868 | 2,63E-43 | 4 |
| Fxyd51   | 1,86E-47 | 0,41 | 0,97 | 0,95  | 3,31E-43 | 4 |

|              |            |      |      |       |           |   |
|--------------|------------|------|------|-------|-----------|---|
| Slc30a4      | 9,01E-44   | 0,32 | 0,65 | 0,482 | 1,60E-39  | 4 |
| Abl2         | 6,82E-43   | 0,34 | 0,78 | 0,711 | 1,21E-38  | 4 |
| Myof1        | 1,95E-41   | 0,32 | 0,56 | 0,372 | 3,48E-37  | 4 |
| D31425E22Rik | 4,91E-40   | 0,34 | 0,74 | 0,641 | 8,74E-36  | 4 |
| Fosb1        | 8,50E-40   | 0,38 | 0,96 | 0,917 | 1,51E-35  | 4 |
| Plat1        | 1,30E-39   | 0,38 | 0,94 | 0,943 | 2,31E-35  | 4 |
| Pgap2        | 7,89E-37   | 0,34 | 0,7  | 0,599 | 1,41E-32  | 4 |
| Klf6         | 5,79E-35   | 0,45 | 0,92 | 0,907 | 1,03E-30  | 4 |
| Klf4         | 5,12E-27   | 0,45 | 0,92 | 0,909 | 9,11E-23  | 4 |
| Matn4        | 1,62E-23   | 0,47 | 0,74 | 0,75  | 2,89E-19  | 4 |
| Hbegf1       | 2,24E-17   | 0,47 | 0,48 | 0,375 | 3,98E-13  | 4 |
| Ednrb1       | 4,32E-15   | 0,33 | 0,82 | 0,847 | 7,70E-11  | 4 |
| Hist1h1c     | 4,32E-12   | 0,36 | 0,6  | 0,566 | 7,69E-08  | 4 |
| Prdx1        | 0,00030552 | 0,44 | 1    | 1     | 1         | 4 |
| Timp11       | 0,00134221 | 0,59 | 0,93 | 0,962 | 1         | 4 |
| Bnip3        | 0          | 1,69 | 0,85 | 0,358 | 0         | 5 |
| Ldha         | 0          | 1,38 | 1    | 0,92  | 0         | 5 |
| Aldoa        | 0          | 1,29 | 1    | 0,999 | 0         | 5 |
| Mif1         | 0          | 1,25 | 1    | 0,996 | 0         | 5 |
| Gpr137b      | 0          | 1,21 | 0,94 | 0,602 | 0         | 5 |
| Tpi1         | 0          | 1,19 | 1    | 0,951 | 0         | 5 |
| Slc2a1       | 0          | 1,12 | 0,73 | 0,229 | 0         | 5 |
| Hk2          | 0          | 1,01 | 0,64 | 0,139 | 0         | 5 |
| Prelid2      | 0          | 0,49 | 0,35 | 0,027 | 0         | 5 |
| Actg1        | 2,38E-299  | 1,18 | 1    | 0,998 | 4,24E-295 | 5 |
| Vegfa        | 1,58E-294  | 1,05 | 0,82 | 0,365 | 2,82E-290 | 5 |
| Pgk1         | 3,86E-288  | 1,05 | 1    | 0,973 | 6,88E-284 | 5 |
| Ero1l        | 1,35E-280  | 1,46 | 0,96 | 0,726 | 2,41E-276 | 5 |
| Gapdh        | 9,85E-266  | 1,03 | 1    | 0,999 | 1,75E-261 | 5 |
| Pkm          | 3,71E-249  | 0,84 | 1    | 0,995 | 6,60E-245 | 5 |
| Gpi1         | 4,50E-235  | 0,76 | 1    | 0,999 | 8,01E-231 | 5 |
| Fam162a      | 4,80E-233  | 1,09 | 0,97 | 0,791 | 8,54E-229 | 5 |
| Pdk1         | 9,77E-233  | 0,58 | 0,53 | 0,134 | 1,74E-228 | 5 |
| Lgals31      | 4,37E-215  | 1,14 | 1    | 0,967 | 7,79E-211 | 5 |
| Cited11      | 5,09E-214  | 1,17 | 0,93 | 0,581 | 9,07E-210 | 5 |
| Pgam1        | 7,91E-210  | 0,75 | 1    | 0,99  | 1,41E-205 | 5 |
| Higd1a       | 7,14E-209  | 1,12 | 0,98 | 0,86  | 1,27E-204 | 5 |
| Bhlhe41      | 7,08E-206  | 1,11 | 0,69 | 0,287 | 1,26E-201 | 5 |
| Eif1         | 7,84E-204  | 0,75 | 1    | 1     | 1,40E-199 | 5 |
| Hspa9        | 1,51E-191  | 0,76 | 0,99 | 0,886 | 2,69E-187 | 5 |
| Tmod1        | 3,77E-190  | 0,88 | 0,77 | 0,396 | 6,72E-186 | 5 |
| Ndrg1        | 5,71E-185  | 0,45 | 0,33 | 0,062 | 1,02E-180 | 5 |
| C77080       | 3,67E-182  | 0,82 | 0,65 | 0,27  | 6,53E-178 | 5 |
| Chchd101     | 3,07E-178  | 0,91 | 0,97 | 0,693 | 5,47E-174 | 5 |
| Phlda1       | 5,52E-170  | 0,94 | 1    | 0,999 | 9,83E-166 | 5 |
| Atp6v1g1     | 1,35E-167  | 0,53 | 1    | 0,998 | 2,41E-163 | 5 |

|            |           |      |      |       |           |   |
|------------|-----------|------|------|-------|-----------|---|
| Fau        | 1,63E-155 | 0,49 | 1    | 1     | 2,91E-151 | 5 |
| mt-Co1     | 1,83E-149 | 0,43 | 1    | 1     | 3,25E-145 | 5 |
| Irx3       | 9,10E-146 | 0,69 | 0,54 | 0,206 | 1,62E-141 | 5 |
| Alkbh5     | 1,78E-145 | 0,6  | 0,92 | 0,714 | 3,17E-141 | 5 |
| Gabarap    | 3,45E-145 | 0,49 | 1    | 0,997 | 6,15E-141 | 5 |
| Rps21      | 2,10E-138 | 0,45 | 1    | 1     | 3,73E-134 | 5 |
| Npm1       | 3,10E-137 | 0,47 | 1    | 0,998 | 5,52E-133 | 5 |
| Bnip3l     | 1,54E-135 | 0,56 | 0,99 | 0,944 | 2,74E-131 | 5 |
| St13       | 8,86E-132 | 0,45 | 1    | 0,998 | 1,58E-127 | 5 |
| Adm1       | 4,80E-131 | 0,93 | 0,75 | 0,444 | 8,54E-127 | 5 |
| Pfkl       | 8,20E-126 | 0,61 | 0,87 | 0,637 | 1,46E-121 | 5 |
| Syt4       | 1,15E-125 | 0,55 | 1    | 1     | 2,04E-121 | 5 |
| Rpl22      | 1,44E-125 | 0,4  | 1    | 1     | 2,56E-121 | 5 |
| Pfkp1      | 5,66E-125 | 0,69 | 0,61 | 0,296 | 1,01E-120 | 5 |
| Gpnmb1     | 2,34E-124 | 0,56 | 1    | 0,998 | 4,16E-120 | 5 |
| Rpl17      | 2,61E-124 | 0,44 | 1    | 1     | 4,65E-120 | 5 |
| Rpl30      | 4,68E-124 | 0,43 | 1    | 1     | 8,32E-120 | 5 |
| Vldlr      | 3,73E-123 | 0,42 | 0,35 | 0,099 | 6,65E-119 | 5 |
| Lgals11    | 1,63E-122 | 0,57 | 1    | 0,979 | 2,89E-118 | 5 |
| Cd2741     | 1,66E-122 | 0,67 | 0,46 | 0,165 | 2,96E-118 | 5 |
| Gdf15      | 1,28E-120 | 1,07 | 0,45 | 0,167 | 2,28E-116 | 5 |
| Tpt1       | 4,07E-120 | 0,48 | 1    | 1     | 7,24E-116 | 5 |
| P4ha1      | 5,03E-120 | 0,59 | 0,79 | 0,526 | 8,95E-116 | 5 |
| Rpl27a     | 9,97E-120 | 0,38 | 1    | 1     | 1,77E-115 | 5 |
| Ago2       | 4,15E-119 | 0,68 | 0,97 | 0,885 | 7,38E-115 | 5 |
| Rpl38      | 2,17E-118 | 0,39 | 1    | 1     | 3,86E-114 | 5 |
| AC160336.1 | 5,23E-117 | 1,69 | 0,86 | 0,698 | 9,32E-113 | 5 |
| Fam104a    | 6,33E-117 | 0,54 | 0,96 | 0,835 | 1,13E-112 | 5 |
| Mkrn11     | 2,16E-116 | 0,51 | 1    | 0,986 | 3,84E-112 | 5 |
| Rps24      | 2,69E-116 | 0,45 | 1    | 1     | 4,79E-112 | 5 |
| Fnip1      | 3,97E-114 | 0,54 | 0,89 | 0,712 | 7,06E-110 | 5 |
| Lrrfip1    | 4,43E-114 | 0,54 | 1    | 0,957 | 7,89E-110 | 5 |
| Ugcg       | 4,44E-113 | 0,7  | 0,88 | 0,715 | 7,90E-109 | 5 |
| Rpl361     | 2,69E-112 | 0,43 | 1    | 1     | 4,78E-108 | 5 |
| Atf4       | 3,05E-111 | 0,66 | 0,99 | 0,985 | 5,44E-107 | 5 |
| Rpl231     | 3,46E-111 | 0,39 | 1    | 1     | 6,15E-107 | 5 |
| Rps27      | 1,09E-109 | 0,44 | 1    | 1     | 1,94E-105 | 5 |
| Arhgap6    | 8,45E-109 | 0,54 | 0,97 | 0,871 | 1,50E-104 | 5 |
| Rps10      | 3,69E-107 | 0,37 | 1    | 1     | 6,57E-103 | 5 |
| Abca11     | 2,21E-106 | 0,61 | 0,96 | 0,823 | 3,94E-102 | 5 |
| Bhlhe40    | 2,23E-106 | 0,74 | 0,76 | 0,5   | 3,97E-102 | 5 |
| Rplp11     | 7,66E-104 | 0,41 | 1    | 1     | 1,36E-99  | 5 |
| Cd631      | 3,06E-103 | 0,47 | 1    | 1     | 5,45E-99  | 5 |
| Hsp90aa1   | 6,64E-103 | 0,6  | 1    | 0,997 | 1,18E-98  | 5 |
| Atp6v1a    | 7,41E-103 | 0,53 | 1    | 0,98  | 1,32E-98  | 5 |
| Rpl26      | 1,42E-101 | 0,34 | 1    | 1     | 2,52E-97  | 5 |



|           |           |      |      |       |          |   |
|-----------|-----------|------|------|-------|----------|---|
| Rps281    | 4,20E-101 | 0,35 | 1    | 1     | 7,48E-97 | 5 |
| Rpl18a1   | 2,73E-100 | 0,38 | 1    | 1     | 4,86E-96 | 5 |
| Eif2s2    | 5,04E-99  | 0,41 | 1    | 0,994 | 8,98E-95 | 5 |
| Rpl24     | 7,31E-98  | 0,33 | 1    | 1     | 1,30E-93 | 5 |
| Dip2b     | 7,80E-98  | 0,48 | 0,98 | 0,928 | 1,39E-93 | 5 |
| Rpl5      | 8,31E-98  | 0,35 | 1    | 1     | 1,48E-93 | 5 |
| Rps5      | 1,43E-97  | 0,39 | 1    | 1     | 2,54E-93 | 5 |
| Rps291    | 2,20E-94  | 0,31 | 1    | 1     | 3,92E-90 | 5 |
| Rps161    | 9,10E-94  | 0,36 | 1    | 1     | 1,62E-89 | 5 |
| Rps151    | 6,53E-93  | 0,34 | 1    | 1     | 1,16E-88 | 5 |
| Eif4a2    | 3,15E-92  | 0,35 | 1    | 0,99  | 5,61E-88 | 5 |
| Psm8      | 3,66E-91  | 0,6  | 0,98 | 0,917 | 6,52E-87 | 5 |
| Atp5g21   | 5,28E-91  | 0,37 | 1    | 1     | 9,40E-87 | 5 |
| Zyx1      | 1,41E-90  | 0,56 | 1    | 0,983 | 2,51E-86 | 5 |
| Rps141    | 9,56E-90  | 0,37 | 1    | 1     | 1,70E-85 | 5 |
| Actr3     | 1,47E-89  | 0,5  | 0,93 | 0,825 | 2,62E-85 | 5 |
| Rps3a1    | 2,59E-89  | 0,33 | 1    | 1     | 4,60E-85 | 5 |
| Rpl14     | 3,12E-89  | 0,36 | 1    | 1     | 5,55E-85 | 5 |
| Eif4ebp11 | 7,15E-89  | 0,59 | 0,69 | 0,45  | 1,27E-84 | 5 |
| Rpl371    | 1,17E-88  | 0,31 | 1    | 1     | 2,08E-84 | 5 |
| mt-Co2    | 1,24E-87  | 0,34 | 1    | 1     | 2,20E-83 | 5 |
| Mt2       | 8,78E-87  | 0,6  | 1    | 0,998 | 1,56E-82 | 5 |
| Cystm1    | 3,34E-86  | 0,45 | 0,96 | 0,84  | 5,95E-82 | 5 |
| Rpl35a1   | 9,77E-86  | 0,32 | 1    | 1     | 1,74E-81 | 5 |
| Rabac1    | 1,28E-83  | 0,4  | 1    | 0,995 | 2,28E-79 | 5 |
| Rpl131    | 5,06E-83  | 0,31 | 1    | 1     | 9,00E-79 | 5 |
| Naa50     | 3,20E-82  | 0,47 | 0,94 | 0,808 | 5,70E-78 | 5 |
| Rragd     | 6,91E-82  | 0,45 | 0,4  | 0,162 | 1,23E-77 | 5 |
| Eef1d     | 8,24E-82  | 0,37 | 1    | 0,99  | 1,47E-77 | 5 |
| Rpl341    | 1,82E-80  | 0,36 | 1    | 1     | 3,25E-76 | 5 |
| Atp6v0b   | 2,28E-80  | 0,35 | 0,99 | 0,975 | 4,06E-76 | 5 |
| Rora      | 2,30E-80  | 0,46 | 0,91 | 0,768 | 4,09E-76 | 5 |
| Aff3      | 3,75E-80  | 0,5  | 0,59 | 0,333 | 6,67E-76 | 5 |
| Gas2l3    | 1,52E-79  | 0,49 | 0,45 | 0,202 | 2,71E-75 | 5 |
| Bri31     | 2,59E-78  | 0,38 | 1    | 0,988 | 4,60E-74 | 5 |
| Cfl2      | 9,31E-78  | 0,4  | 0,98 | 0,938 | 1,66E-73 | 5 |
| Plekhf2   | 1,18E-77  | 0,43 | 0,42 | 0,184 | 2,10E-73 | 5 |
| Vat1      | 1,10E-76  | 0,4  | 0,98 | 0,885 | 1,97E-72 | 5 |
| Hnrnpc    | 4,63E-76  | 0,37 | 0,99 | 0,964 | 8,24E-72 | 5 |
| Rpsa      | 1,64E-74  | 0,36 | 1    | 1     | 2,92E-70 | 5 |
| Rps231    | 4,05E-74  | 0,34 | 1    | 1     | 7,21E-70 | 5 |
| Rpl37a1   | 6,29E-74  | 0,35 | 1    | 1     | 1,12E-69 | 5 |
| Rplp21    | 3,47E-73  | 0,33 | 1    | 1     | 6,17E-69 | 5 |
| Rps15a1   | 7,43E-73  | 0,32 | 1    | 1     | 1,32E-68 | 5 |
| Ddit3     | 2,91E-72  | 0,53 | 0,79 | 0,601 | 5,18E-68 | 5 |
| Rps12     | 7,95E-72  | 0,3  | 1    | 1     | 1,42E-67 | 5 |

|           |          |      |      |       |          |   |
|-----------|----------|------|------|-------|----------|---|
| Naca      | 1,51E-71 | 0,33 | 1    | 1     | 2,70E-67 | 5 |
| Plekhm2   | 3,23E-71 | 0,42 | 0,87 | 0,704 | 5,76E-67 | 5 |
| St3gal1   | 1,48E-70 | 0,5  | 0,47 | 0,241 | 2,63E-66 | 5 |
| Eno11     | 3,26E-70 | 0,46 | 0,99 | 0,952 | 5,80E-66 | 5 |
| Gyg       | 1,59E-69 | 0,5  | 0,94 | 0,84  | 2,82E-65 | 5 |
| Ftl11     | 3,21E-69 | 0,33 | 1    | 1     | 5,72E-65 | 5 |
| Fbln7     | 4,79E-69 | 0,5  | 0,87 | 0,703 | 8,53E-65 | 5 |
| Met1      | 3,84E-68 | 0,46 | 0,9  | 0,717 | 6,84E-64 | 5 |
| Egln1     | 3,85E-68 | 0,52 | 0,94 | 0,885 | 6,86E-64 | 5 |
| Pnrc11    | 3,41E-67 | 0,41 | 0,97 | 0,891 | 6,06E-63 | 5 |
| Pkn2      | 1,24E-66 | 0,36 | 0,97 | 0,907 | 2,20E-62 | 5 |
| Rpl4      | 2,04E-66 | 0,31 | 1    | 0,996 | 3,63E-62 | 5 |
| Rps71     | 1,31E-65 | 0,31 | 1    | 0,999 | 2,34E-61 | 5 |
| Ahnak3    | 1,46E-65 | 0,53 | 0,85 | 0,651 | 2,59E-61 | 5 |
| Kdm3a     | 3,31E-65 | 0,4  | 0,82 | 0,663 | 5,90E-61 | 5 |
| Mxi1      | 1,58E-64 | 0,45 | 0,6  | 0,386 | 2,81E-60 | 5 |
| Fam96b    | 6,59E-64 | 0,39 | 0,86 | 0,728 | 1,17E-59 | 5 |
| Pdcd5     | 8,01E-64 | 0,36 | 0,99 | 0,953 | 1,43E-59 | 5 |
| Pla2g2e1  | 1,22E-63 | 0,43 | 0,54 | 0,291 | 2,17E-59 | 5 |
| Crebrf    | 1,72E-63 | 0,42 | 0,96 | 0,897 | 3,07E-59 | 5 |
| Ndufb91   | 1,20E-62 | 0,33 | 1    | 0,995 | 2,13E-58 | 5 |
| Mgll      | 2,16E-62 | 0,59 | 0,4  | 0,193 | 3,85E-58 | 5 |
| Lhfp12    | 1,38E-60 | 0,51 | 0,81 | 0,646 | 2,46E-56 | 5 |
| Mt1       | 1,62E-60 | 0,43 | 1    | 1     | 2,88E-56 | 5 |
| Zfand5    | 1,80E-60 | 0,35 | 1    | 0,994 | 3,20E-56 | 5 |
| Fam50a    | 3,27E-60 | 0,41 | 0,73 | 0,542 | 5,81E-56 | 5 |
| Atp6v1b21 | 8,76E-60 | 0,42 | 0,97 | 0,932 | 1,56E-55 | 5 |
| Cd44      | 1,05E-59 | 0,33 | 1    | 0,998 | 1,87E-55 | 5 |
| Atp6ap21  | 7,07E-59 | 0,34 | 1    | 0,993 | 1,26E-54 | 5 |
| Clybl     | 8,47E-58 | 0,3  | 0,31 | 0,127 | 1,51E-53 | 5 |
| Ppargc1a  | 8,48E-58 | 0,64 | 0,59 | 0,374 | 1,51E-53 | 5 |
| Eif3c     | 8,64E-58 | 0,32 | 1    | 0,993 | 1,54E-53 | 5 |
| Tpm4      | 1,97E-57 | 0,38 | 0,98 | 0,909 | 3,50E-53 | 5 |
| Slc3a2    | 5,54E-56 | 0,39 | 0,98 | 0,96  | 9,86E-52 | 5 |
| Uqcrh1    | 5,54E-56 | 0,31 | 1    | 0,999 | 9,87E-52 | 5 |
| Vegfb1    | 5,73E-56 | 0,33 | 0,86 | 0,681 | 1,02E-51 | 5 |
| Nceh11    | 8,58E-56 | 0,33 | 1    | 0,954 | 1,53E-51 | 5 |
| Larp4     | 1,63E-55 | 0,35 | 0,92 | 0,815 | 2,91E-51 | 5 |
| Sars      | 2,39E-55 | 0,33 | 0,99 | 0,984 | 4,26E-51 | 5 |
| Dnajc21   | 5,61E-55 | 0,43 | 0,62 | 0,446 | 9,98E-51 | 5 |
| Akap2     | 2,15E-54 | 0,45 | 0,58 | 0,39  | 3,84E-50 | 5 |
| Cdv3      | 5,47E-54 | 0,34 | 0,96 | 0,898 | 9,74E-50 | 5 |
| Scaf11    | 5,94E-54 | 0,32 | 0,99 | 0,986 | 1,06E-49 | 5 |
| Ppfibp2   | 6,90E-54 | 0,42 | 0,91 | 0,797 | 1,23E-49 | 5 |
| Atf31     | 1,66E-53 | 0,61 | 0,52 | 0,3   | 2,95E-49 | 5 |
| Arl8b     | 2,94E-53 | 0,34 | 0,91 | 0,818 | 5,24E-49 | 5 |

|            |          |      |      |       |          |   |
|------------|----------|------|------|-------|----------|---|
| Vapa       | 3,13E-53 | 0,32 | 0,96 | 0,9   | 5,56E-49 | 5 |
| Dusp8      | 6,30E-53 | 0,31 | 0,31 | 0,131 | 1,12E-48 | 5 |
| Gabarapl1  | 2,54E-52 | 0,41 | 0,97 | 0,952 | 4,52E-48 | 5 |
| Rlf1       | 1,56E-51 | 0,37 | 0,76 | 0,588 | 2,78E-47 | 5 |
| Sun2       | 3,53E-51 | 0,38 | 0,52 | 0,318 | 6,28E-47 | 5 |
| Atf5       | 4,92E-50 | 0,46 | 0,78 | 0,655 | 8,75E-46 | 5 |
| Vps35      | 6,06E-50 | 0,32 | 0,97 | 0,935 | 1,08E-45 | 5 |
| Preld1     | 7,78E-50 | 0,3  | 0,93 | 0,862 | 1,38E-45 | 5 |
| Srrm1      | 1,29E-49 | 0,3  | 0,98 | 0,943 | 2,30E-45 | 5 |
| Tceal9     | 1,88E-49 | 0,36 | 1    | 0,994 | 3,34E-45 | 5 |
| Lyst1      | 5,72E-48 | 0,48 | 0,85 | 0,723 | 1,02E-43 | 5 |
| Patl1      | 5,77E-48 | 0,34 | 0,45 | 0,255 | 1,03E-43 | 5 |
| Usf2       | 1,04E-47 | 0,3  | 0,95 | 0,88  | 1,85E-43 | 5 |
| Arpp19     | 3,87E-47 | 0,31 | 0,95 | 0,916 | 6,89E-43 | 5 |
| Tfrc       | 2,15E-46 | 0,41 | 0,41 | 0,229 | 3,84E-42 | 5 |
| Ptprj      | 2,76E-46 | 0,39 | 0,82 | 0,709 | 4,91E-42 | 5 |
| Eea1       | 2,82E-46 | 0,38 | 0,9  | 0,816 | 5,03E-42 | 5 |
| Nars       | 3,02E-46 | 0,31 | 0,99 | 0,96  | 5,37E-42 | 5 |
| Arhgap5    | 4,11E-46 | 0,32 | 0,92 | 0,81  | 7,32E-42 | 5 |
| Ubl31      | 5,73E-45 | 0,32 | 0,99 | 0,98  | 1,02E-40 | 5 |
| Nampt1     | 6,13E-45 | 0,33 | 0,51 | 0,313 | 1,09E-40 | 5 |
| Rnf19a     | 7,14E-45 | 0,41 | 0,62 | 0,458 | 1,27E-40 | 5 |
| Herpud1    | 7,96E-45 | 0,34 | 0,9  | 0,789 | 1,42E-40 | 5 |
| Tmem1401   | 1,05E-44 | 0,44 | 0,79 | 0,643 | 1,88E-40 | 5 |
| Pmel2      | 1,57E-44 | 0,41 | 0,83 | 0,656 | 2,79E-40 | 5 |
| C1qbp      | 1,33E-43 | 0,31 | 0,86 | 0,746 | 2,37E-39 | 5 |
| Fxyd31     | 5,26E-43 | 0,4  | 0,98 | 0,949 | 9,37E-39 | 5 |
| Cebpg      | 1,46E-42 | 0,42 | 0,66 | 0,507 | 2,60E-38 | 5 |
| H1f0       | 8,98E-42 | 0,46 | 0,75 | 0,613 | 1,60E-37 | 5 |
| Trappc6a   | 9,32E-42 | 0,34 | 0,77 | 0,649 | 1,66E-37 | 5 |
| Gnl3       | 1,84E-40 | 0,36 | 0,96 | 0,905 | 3,27E-36 | 5 |
| Csrp1      | 2,44E-40 | 0,31 | 1    | 0,997 | 4,34E-36 | 5 |
| Klf61      | 2,28E-39 | 0,37 | 0,97 | 0,904 | 4,05E-35 | 5 |
| Zfp622     | 5,25E-39 | 0,33 | 0,72 | 0,585 | 9,35E-35 | 5 |
| Fermt2     | 9,44E-39 | 0,31 | 0,94 | 0,903 | 1,68E-34 | 5 |
| Mthfd2     | 2,11E-38 | 0,41 | 0,42 | 0,254 | 3,76E-34 | 5 |
| Epb41l4aos | 2,57E-38 | 0,36 | 0,49 | 0,326 | 4,58E-34 | 5 |
| Ppp1r15a1  | 4,51E-38 | 0,33 | 0,83 | 0,677 | 8,03E-34 | 5 |
| Golga4     | 1,54E-37 | 0,3  | 0,95 | 0,908 | 2,73E-33 | 5 |
| Igf2bp2    | 2,09E-37 | 0,36 | 0,54 | 0,373 | 3,73E-33 | 5 |
| Cmtm4      | 2,62E-37 | 0,35 | 0,69 | 0,557 | 4,67E-33 | 5 |
| Stam       | 6,55E-37 | 0,32 | 0,74 | 0,617 | 1,17E-32 | 5 |
| Cpeb41     | 1,11E-36 | 0,38 | 0,88 | 0,778 | 1,98E-32 | 5 |
| Selenop1   | 1,13E-36 | 0,33 | 1    | 0,996 | 2,02E-32 | 5 |
| Rragc      | 4,01E-36 | 0,31 | 0,59 | 0,426 | 7,14E-32 | 5 |
| Socs6      | 1,02E-35 | 0,43 | 0,75 | 0,648 | 1,81E-31 | 5 |

|            |           |      |      |       |           |   |
|------------|-----------|------|------|-------|-----------|---|
| Atp6v1h    | 2,47E-35  | 0,37 | 0,76 | 0,663 | 4,39E-31  | 5 |
| Ate1       | 2,81E-35  | 0,32 | 0,72 | 0,593 | 5,01E-31  | 5 |
| Neat11     | 3,49E-35  | 0,37 | 1    | 0,994 | 6,21E-31  | 5 |
| Glul1      | 3,71E-35  | 0,42 | 0,72 | 0,541 | 6,60E-31  | 5 |
| Kit        | 3,95E-35  | 0,46 | 0,48 | 0,315 | 7,03E-31  | 5 |
| Slc7a1     | 4,08E-35  | 0,35 | 0,5  | 0,341 | 7,26E-31  | 5 |
| Lcorl      | 4,39E-35  | 0,34 | 0,78 | 0,664 | 7,81E-31  | 5 |
| Dhrs3      | 5,18E-35  | 0,31 | 0,99 | 0,978 | 9,23E-31  | 5 |
| Jmjd6      | 8,73E-35  | 0,31 | 0,55 | 0,398 | 1,55E-30  | 5 |
| Xpo1       | 1,69E-33  | 0,33 | 0,49 | 0,337 | 3,01E-29  | 5 |
| Hspa1a     | 6,55E-32  | 0,8  | 0,31 | 0,169 | 1,17E-27  | 5 |
| Gm269171   | 1,89E-31  | 0,49 | 0,91 | 0,844 | 3,36E-27  | 5 |
| Gadd45b    | 8,49E-31  | 0,42 | 0,78 | 0,628 | 1,51E-26  | 5 |
| Ahr        | 1,46E-27  | 0,33 | 0,38 | 0,235 | 2,61E-23  | 5 |
| Igf2bp3    | 2,39E-27  | 0,41 | 0,35 | 0,208 | 4,25E-23  | 5 |
| Zfp2921    | 3,93E-27  | 0,32 | 0,84 | 0,755 | 6,99E-23  | 5 |
| Agfg1      | 1,17E-22  | 0,3  | 0,88 | 0,833 | 2,07E-18  | 5 |
| P3h2       | 3,84E-22  | 0,31 | 0,82 | 0,735 | 6,84E-18  | 5 |
| Ccny       | 1,45E-18  | 0,35 | 0,7  | 0,618 | 2,58E-14  | 5 |
| Tnfrsf12a1 | 1,48E-17  | 0,37 | 0,46 | 0,35  | 2,64E-13  | 5 |
| Hmox11     | 1,92E-15  | 0,32 | 0,48 | 0,381 | 3,42E-11  | 5 |
| Ebf1       | 2,37E-229 | 1,16 | 0,72 | 0,039 | 4,21E-225 | 6 |
| Tshz2      | 1,58E-219 | 0,72 | 0,52 | 0,02  | 2,82E-215 | 6 |
| Lama2      | 8,40E-198 | 1,1  | 0,6  | 0,03  | 1,50E-193 | 6 |
| Runx1t1    | 5,05E-194 | 0,49 | 0,36 | 0,01  | 8,99E-190 | 6 |
| Piezo2     | 5,94E-182 | 0,94 | 0,62 | 0,036 | 1,06E-177 | 6 |
| Tln2       | 9,59E-169 | 0,67 | 0,49 | 0,024 | 1,71E-164 | 6 |
| Epb41l3    | 7,38E-158 | 0,8  | 0,51 | 0,027 | 1,31E-153 | 6 |
| Egfr       | 6,14E-151 | 0,8  | 0,51 | 0,028 | 1,09E-146 | 6 |
| Bicc1      | 5,31E-140 | 1,67 | 0,81 | 0,085 | 9,45E-136 | 6 |
| Ebf2       | 3,95E-131 | 1,02 | 0,53 | 0,036 | 7,03E-127 | 6 |
| Adamts2    | 1,25E-130 | 0,98 | 0,66 | 0,057 | 2,23E-126 | 6 |
| Osmr       | 4,39E-128 | 0,77 | 0,53 | 0,036 | 7,81E-124 | 6 |
| Ddr2       | 7,04E-128 | 0,88 | 0,52 | 0,035 | 1,25E-123 | 6 |
| Col28a1    | 4,35E-115 | 0,86 | 0,41 | 0,024 | 7,74E-111 | 6 |
| Slit3      | 3,10E-113 | 0,44 | 0,36 | 0,018 | 5,52E-109 | 6 |
| Scn7a      | 1,53E-109 | 0,86 | 0,45 | 0,031 | 2,72E-105 | 6 |
| Mrc2       | 1,07E-105 | 0,54 | 0,43 | 0,028 | 1,90E-101 | 6 |
| Col6a3     | 3,21E-102 | 1,42 | 0,76 | 0,103 | 5,71E-98  | 6 |
| Sned1      | 1,18E-99  | 0,92 | 0,54 | 0,049 | 2,10E-95  | 6 |
| Clmp       | 1,38E-99  | 0,5  | 0,33 | 0,018 | 2,45E-95  | 6 |
| Tshz3      | 2,84E-99  | 0,6  | 0,35 | 0,02  | 5,06E-95  | 6 |
| Pdgfrb     | 1,57E-97  | 0,67 | 0,35 | 0,02  | 2,79E-93  | 6 |
| Itga1      | 1,70E-91  | 1    | 0,59 | 0,063 | 3,04E-87  | 6 |
| Fap        | 2,51E-90  | 0,4  | 0,31 | 0,017 | 4,47E-86  | 6 |
| Gxylt2     | 5,35E-90  | 0,38 | 0,31 | 0,017 | 9,52E-86  | 6 |

|         |          |      |      |       |          |   |
|---------|----------|------|------|-------|----------|---|
| Islr    | 8,82E-87 | 1,27 | 0,58 | 0,064 | 1,57E-82 | 6 |
| Colec12 | 8,10E-86 | 0,57 | 0,38 | 0,027 | 1,44E-81 | 6 |
| Klf5    | 4,87E-85 | 0,51 | 0,33 | 0,021 | 8,66E-81 | 6 |
| Gpx8    | 1,56E-84 | 0,56 | 0,37 | 0,026 | 2,79E-80 | 6 |
| Col14a1 | 9,67E-82 | 1,4  | 0,71 | 0,109 | 1,72E-77 | 6 |
| Abca8a  | 5,53E-81 | 1,24 | 0,54 | 0,062 | 9,85E-77 | 6 |
| Col4a2  | 1,12E-79 | 1,87 | 0,75 | 0,132 | 2,00E-75 | 6 |
| Tns1    | 8,21E-79 | 0,7  | 0,49 | 0,051 | 1,46E-74 | 6 |
| Actn1   | 5,06E-74 | 0,73 | 0,59 | 0,076 | 9,01E-70 | 6 |
| Cldn1   | 9,93E-74 | 0,59 | 0,36 | 0,028 | 1,77E-69 | 6 |
| Pcdh19  | 1,86E-73 | 0,57 | 0,4  | 0,036 | 3,31E-69 | 6 |
| Fndc1   | 1,19E-71 | 1,06 | 0,56 | 0,074 | 2,12E-67 | 6 |
| Gm12840 | 3,18E-71 | 1,03 | 0,45 | 0,047 | 5,66E-67 | 6 |
| Ntrk2   | 3,31E-69 | 1,06 | 0,35 | 0,028 | 5,90E-65 | 6 |
| Col4a1  | 2,26E-68 | 2,23 | 0,81 | 0,182 | 4,01E-64 | 6 |
| Sulf1   | 7,41E-68 | 0,61 | 0,45 | 0,048 | 1,32E-63 | 6 |
| Stra6   | 1,49E-65 | 0,51 | 0,35 | 0,029 | 2,66E-61 | 6 |
| Slc43a3 | 3,60E-65 | 0,42 | 0,32 | 0,026 | 6,42E-61 | 6 |
| Steap4  | 1,07E-64 | 0,63 | 0,31 | 0,024 | 1,90E-60 | 6 |
| Gpc3    | 1,70E-64 | 1,19 | 0,55 | 0,08  | 3,03E-60 | 6 |
| Prrx1   | 3,23E-63 | 0,92 | 0,45 | 0,052 | 5,75E-59 | 6 |
| Ltbp4   | 3,52E-63 | 0,73 | 0,54 | 0,075 | 6,27E-59 | 6 |
| Loxl2   | 9,97E-63 | 0,85 | 0,49 | 0,064 | 1,78E-58 | 6 |
| Col8a1  | 3,05E-60 | 2,01 | 0,68 | 0,133 | 5,44E-56 | 6 |
| Medag   | 6,62E-58 | 0,59 | 0,35 | 0,033 | 1,18E-53 | 6 |
| Thbs4   | 9,62E-58 | 1,43 | 0,48 | 0,067 | 1,71E-53 | 6 |
| Fbn1    | 2,08E-57 | 1,89 | 0,79 | 0,224 | 3,71E-53 | 6 |
| Cd248   | 3,43E-57 | 0,71 | 0,51 | 0,072 | 6,10E-53 | 6 |
| Pear1   | 1,25E-55 | 0,46 | 0,38 | 0,042 | 2,23E-51 | 6 |
| Ccdc80  | 2,01E-55 | 0,75 | 0,46 | 0,062 | 3,58E-51 | 6 |
| Loxl1   | 8,68E-55 | 0,55 | 0,44 | 0,055 | 1,55E-50 | 6 |
| Emilin2 | 1,05E-54 | 0,4  | 0,33 | 0,033 | 1,87E-50 | 6 |
| Inhba   | 4,86E-54 | 1,06 | 0,49 | 0,073 | 8,65E-50 | 6 |
| Lbp     | 1,79E-53 | 0,69 | 0,4  | 0,048 | 3,19E-49 | 6 |
| Col5a2  | 1,93E-52 | 1,57 | 0,83 | 0,277 | 3,44E-48 | 6 |
| Cpxm1   | 2,06E-52 | 1,32 | 0,62 | 0,124 | 3,66E-48 | 6 |
| Igfbp7  | 1,53E-51 | 2,53 | 0,95 | 0,435 | 2,73E-47 | 6 |
| Mfap2   | 4,48E-51 | 0,49 | 0,35 | 0,037 | 7,97E-47 | 6 |
| Entpd2  | 3,62E-50 | 0,61 | 0,32 | 0,034 | 6,45E-46 | 6 |
| Cdh11   | 3,20E-49 | 0,8  | 0,46 | 0,07  | 5,69E-45 | 6 |
| Fbn2    | 2,17E-48 | 1,43 | 0,68 | 0,164 | 3,87E-44 | 6 |
| Ccl11   | 1,61E-47 | 1,4  | 0,52 | 0,092 | 2,86E-43 | 6 |
| Tnxb    | 5,98E-47 | 0,49 | 0,32 | 0,035 | 1,06E-42 | 6 |
| Cd34    | 8,84E-47 | 0,76 | 0,49 | 0,082 | 1,57E-42 | 6 |
| Col1a1  | 9,04E-46 | 2,66 | 0,97 | 0,64  | 1,61E-41 | 6 |
| Ecsr    | 9,33E-46 | 0,51 | 0,31 | 0,034 | 1,66E-41 | 6 |

|          |          |      |      |       |          |   |
|----------|----------|------|------|-------|----------|---|
| Lepr     | 1,70E-45 | 0,68 | 0,32 | 0,036 | 3,02E-41 | 6 |
| Serping1 | 2,87E-45 | 1,94 | 0,84 | 0,309 | 5,11E-41 | 6 |
| Dmd      | 1,79E-44 | 0,36 | 0,31 | 0,034 | 3,19E-40 | 6 |
| Col3a11  | 1,99E-44 | 2,51 | 1    | 0,833 | 3,53E-40 | 6 |
| Col15a1  | 3,59E-44 | 1,73 | 0,69 | 0,188 | 6,40E-40 | 6 |
| Col1a21  | 9,79E-44 | 2,65 | 0,97 | 0,715 | 1,74E-39 | 6 |
| Cygb     | 1,09E-43 | 0,93 | 0,45 | 0,074 | 1,94E-39 | 6 |
| Pdpm     | 1,11E-43 | 0,62 | 0,36 | 0,046 | 1,97E-39 | 6 |
| Col6a2   | 1,54E-43 | 1,21 | 0,56 | 0,119 | 2,75E-39 | 6 |
| Meg3     | 3,86E-42 | 1,96 | 0,54 | 0,12  | 6,87E-38 | 6 |
| Smoc2    | 1,15E-41 | 0,59 | 0,35 | 0,045 | 2,05E-37 | 6 |
| Nfix1    | 2,05E-41 | 0,58 | 0,52 | 0,096 | 3,66E-37 | 6 |
| Ctsk     | 3,79E-41 | 0,49 | 0,37 | 0,051 | 6,74E-37 | 6 |
| Abi3bp   | 4,74E-41 | 0,69 | 0,32 | 0,04  | 8,44E-37 | 6 |
| Dcn1     | 6,41E-41 | 2,91 | 0,92 | 0,548 | 1,14E-36 | 6 |
| Phldb2   | 7,18E-41 | 0,49 | 0,41 | 0,064 | 1,28E-36 | 6 |
| Dock5    | 7,69E-41 | 0,38 | 0,31 | 0,037 | 1,37E-36 | 6 |
| C1s1     | 1,14E-40 | 1,13 | 0,53 | 0,109 | 2,03E-36 | 6 |
| Tgfb1    | 1,25E-39 | 1,75 | 0,63 | 0,17  | 2,23E-35 | 6 |
| Col6a1   | 7,62E-38 | 1,38 | 0,78 | 0,268 | 1,36E-33 | 6 |
| Lamb11   | 1,22E-37 | 0,99 | 0,66 | 0,178 | 2,18E-33 | 6 |
| Bgn      | 1,79E-36 | 1,98 | 0,86 | 0,427 | 3,19E-32 | 6 |
| Man1a    | 3,24E-36 | 0,57 | 0,4  | 0,069 | 5,78E-32 | 6 |
| Pcolce   | 4,90E-35 | 1,02 | 0,64 | 0,191 | 8,72E-31 | 6 |
| Serpinf1 | 5,54E-35 | 1,22 | 0,63 | 0,19  | 9,86E-31 | 6 |
| Lsp1     | 1,83E-34 | 0,68 | 0,53 | 0,123 | 3,26E-30 | 6 |
| Sparc    | 1,88E-34 | 1,67 | 1    | 0,995 | 3,35E-30 | 6 |
| Rdh10    | 3,41E-34 | 1    | 0,56 | 0,145 | 6,08E-30 | 6 |
| Fstl11   | 1,18E-33 | 1,64 | 0,93 | 0,547 | 2,11E-29 | 6 |
| Fzd2     | 4,20E-32 | 0,69 | 0,36 | 0,061 | 7,48E-28 | 6 |
| Plac8    | 5,75E-32 | 0,96 | 0,44 | 0,091 | 1,02E-27 | 6 |
| Igfbp6   | 1,60E-31 | 0,93 | 0,51 | 0,123 | 2,84E-27 | 6 |
| Mndal    | 3,90E-31 | 0,46 | 0,33 | 0,053 | 6,94E-27 | 6 |
| Mfap5    | 4,80E-31 | 0,89 | 0,55 | 0,144 | 8,55E-27 | 6 |
| Ifi203   | 1,53E-30 | 0,52 | 0,37 | 0,066 | 2,72E-26 | 6 |
| Id3      | 3,18E-30 | 0,6  | 0,33 | 0,056 | 5,67E-26 | 6 |
| Rarres2  | 8,91E-30 | 0,52 | 0,33 | 0,056 | 1,59E-25 | 6 |
| Hk21     | 4,25E-29 | 1,14 | 0,56 | 0,162 | 7,57E-25 | 6 |
| Gfpt2    | 8,92E-29 | 0,82 | 0,41 | 0,09  | 1,59E-24 | 6 |
| Ptch1    | 1,20E-28 | 1,21 | 0,77 | 0,347 | 2,14E-24 | 6 |
| Thy1     | 1,40E-28 | 1,11 | 0,52 | 0,142 | 2,49E-24 | 6 |
| Runx11   | 2,50E-28 | 0,68 | 0,58 | 0,167 | 4,46E-24 | 6 |
| Ccl2     | 9,78E-28 | 1,62 | 0,61 | 0,197 | 1,74E-23 | 6 |
| Nbl1     | 1,96E-27 | 0,54 | 0,36 | 0,069 | 3,48E-23 | 6 |
| Nid1     | 5,22E-27 | 1,03 | 0,95 | 0,708 | 9,30E-23 | 6 |
| Lum      | 5,67E-27 | 2,18 | 0,74 | 0,33  | 1,01E-22 | 6 |

|            |          |      |      |       |          |   |
|------------|----------|------|------|-------|----------|---|
| Ahnak4     | 1,03E-26 | 1,17 | 0,94 | 0,659 | 1,84E-22 | 6 |
| Hspg21     | 1,83E-26 | 1,02 | 0,87 | 0,537 | 3,26E-22 | 6 |
| Pdzd2      | 2,41E-26 | 0,35 | 0,35 | 0,065 | 4,28E-22 | 6 |
| Csrp2      | 1,08E-25 | 0,57 | 0,51 | 0,136 | 1,93E-21 | 6 |
| Col5a3     | 1,72E-25 | 0,97 | 0,55 | 0,175 | 3,06E-21 | 6 |
| Efemp1     | 1,13E-24 | 0,92 | 0,36 | 0,078 | 2,02E-20 | 6 |
| Apod1      | 1,23E-24 | 3,19 | 0,99 | 0,977 | 2,19E-20 | 6 |
| Col5a1     | 1,36E-23 | 0,97 | 0,7  | 0,337 | 2,43E-19 | 6 |
| Fosl2      | 1,93E-23 | 0,67 | 0,56 | 0,192 | 3,43E-19 | 6 |
| Ly6e       | 6,74E-23 | 0,96 | 0,62 | 0,249 | 1,20E-18 | 6 |
| Nrp11      | 7,53E-23 | 0,85 | 0,61 | 0,213 | 1,34E-18 | 6 |
| Ndrp11     | 7,58E-23 | 0,61 | 0,35 | 0,074 | 1,35E-18 | 6 |
| 030408B16R | 2,20E-22 | 0,54 | 0,33 | 0,071 | 3,91E-18 | 6 |
| Sifn51     | 4,77E-22 | 0,44 | 0,45 | 0,12  | 8,50E-18 | 6 |
| Heg1       | 1,61E-21 | 0,57 | 0,43 | 0,118 | 2,87E-17 | 6 |
| C3         | 1,67E-21 | 1,33 | 0,47 | 0,145 | 2,97E-17 | 6 |
| Mid1       | 3,12E-21 | 0,48 | 0,41 | 0,111 | 5,56E-17 | 6 |
| Pdgfra     | 4,60E-21 | 0,52 | 0,44 | 0,122 | 8,19E-17 | 6 |
| Lhfp       | 6,54E-21 | 0,42 | 0,39 | 0,098 | 1,16E-16 | 6 |
| Cxcl1      | 1,52E-20 | 1,73 | 0,47 | 0,155 | 2,71E-16 | 6 |
| Cthrc1     | 1,95E-20 | 1,09 | 0,48 | 0,154 | 3,47E-16 | 6 |
| Serpine1   | 2,70E-20 | 0,88 | 0,4  | 0,112 | 4,80E-16 | 6 |
| Dock9      | 4,00E-20 | 0,46 | 0,36 | 0,088 | 7,12E-16 | 6 |
| Atp8b1     | 1,39E-19 | 0,69 | 0,54 | 0,196 | 2,48E-15 | 6 |
| Vcan1      | 2,25E-19 | 1,02 | 0,75 | 0,355 | 4,01E-15 | 6 |
| Nr2f2      | 2,39E-19 | 0,91 | 0,75 | 0,419 | 4,26E-15 | 6 |
| Myo1b      | 2,66E-19 | 0,61 | 0,56 | 0,208 | 4,74E-15 | 6 |
| Igfbp5     | 5,21E-19 | 2,08 | 0,63 | 0,291 | 9,27E-15 | 6 |
| Mical21    | 9,87E-19 | 0,68 | 0,45 | 0,134 | 1,76E-14 | 6 |
| Itm2a1     | 1,24E-18 | 0,73 | 0,38 | 0,106 | 2,21E-14 | 6 |
| Il33       | 1,49E-18 | 1,09 | 0,4  | 0,115 | 2,64E-14 | 6 |
| Col18a11   | 3,01E-18 | 0,86 | 0,99 | 0,899 | 5,35E-14 | 6 |
| Ehd2       | 4,28E-18 | 0,37 | 0,35 | 0,087 | 7,62E-14 | 6 |
| Cp1        | 9,73E-18 | 1,29 | 0,83 | 0,549 | 1,73E-13 | 6 |
| Lamc1      | 1,22E-17 | 0,68 | 0,71 | 0,399 | 2,17E-13 | 6 |
| Birc3      | 2,79E-17 | 0,37 | 0,39 | 0,11  | 4,97E-13 | 6 |
| Rnase41    | 6,11E-17 | 0,65 | 0,48 | 0,166 | 1,09E-12 | 6 |
| Mast41     | 3,54E-16 | 0,61 | 0,63 | 0,293 | 6,31E-12 | 6 |
| Pdlim41    | 3,78E-16 | 0,46 | 0,47 | 0,16  | 6,73E-12 | 6 |
| Impact     | 4,44E-16 | 0,33 | 0,43 | 0,133 | 7,91E-12 | 6 |
| Sfrp4      | 4,46E-16 | 0,35 | 0,32 | 0,084 | 7,94E-12 | 6 |
| Pim1       | 9,73E-16 | 0,48 | 0,47 | 0,168 | 1,73E-11 | 6 |
| Cfh1       | 1,10E-15 | 0,92 | 0,58 | 0,255 | 1,96E-11 | 6 |
| Peak11     | 2,80E-15 | 0,58 | 0,83 | 0,493 | 4,98E-11 | 6 |
| Ly6a       | 3,96E-15 | 0,85 | 0,4  | 0,136 | 7,06E-11 | 6 |
| H6pd       | 4,52E-15 | 0,3  | 0,37 | 0,109 | 8,04E-11 | 6 |

|           |          |      |      |       |          |   |
|-----------|----------|------|------|-------|----------|---|
| Pkdcc     | 4,64E-15 | 0,43 | 0,33 | 0,096 | 8,26E-11 | 6 |
| Nhsl2     | 8,93E-15 | 0,34 | 0,36 | 0,108 | 1,59E-10 | 6 |
| Adamts9   | 1,42E-14 | 0,65 | 0,53 | 0,223 | 2,52E-10 | 6 |
| Igfbp3    | 1,74E-14 | 1,5  | 0,39 | 0,132 | 3,10E-10 | 6 |
| Tnfaip3   | 2,08E-14 | 0,6  | 0,4  | 0,138 | 3,71E-10 | 6 |
| Nupr1     | 2,40E-14 | 0,53 | 0,41 | 0,145 | 4,28E-10 | 6 |
| Efnb21    | 3,09E-14 | 0,39 | 0,31 | 0,087 | 5,50E-10 | 6 |
| Bhlhe401  | 4,11E-14 | 0,73 | 0,78 | 0,511 | 7,31E-10 | 6 |
| Hivep2    | 5,12E-14 | 0,53 | 0,95 | 0,774 | 9,11E-10 | 6 |
| Pltp1     | 5,36E-14 | 0,36 | 0,59 | 0,256 | 9,55E-10 | 6 |
| Mmp14     | 5,44E-14 | 0,63 | 0,99 | 0,896 | 9,68E-10 | 6 |
| Svil1     | 1,21E-13 | 0,69 | 0,71 | 0,406 | 2,16E-09 | 6 |
| Abca8b    | 1,90E-13 | 0,53 | 0,47 | 0,192 | 3,38E-09 | 6 |
| Cgnl1     | 2,89E-13 | 0,63 | 0,58 | 0,297 | 5,14E-09 | 6 |
| Ankrd44   | 3,53E-13 | 0,4  | 0,54 | 0,227 | 6,29E-09 | 6 |
| Thbd      | 6,29E-13 | 0,55 | 0,36 | 0,123 | 1,12E-08 | 6 |
| Rock2     | 1,02E-12 | 0,44 | 0,94 | 0,84  | 1,81E-08 | 6 |
| Icam11    | 2,20E-12 | 0,81 | 0,48 | 0,211 | 3,91E-08 | 6 |
| Dcbl2     | 3,02E-12 | 0,51 | 0,58 | 0,286 | 5,38E-08 | 6 |
| Cyr611    | 7,06E-12 | 0,48 | 0,32 | 0,103 | 1,26E-07 | 6 |
| Rbms11    | 7,33E-12 | 0,49 | 0,98 | 0,866 | 1,31E-07 | 6 |
| Mxra8     | 8,36E-12 | 0,42 | 0,49 | 0,215 | 1,49E-07 | 6 |
| S100a11   | 9,01E-12 | 0,51 | 0,95 | 0,94  | 1,60E-07 | 6 |
| Ppic      | 9,92E-12 | 0,67 | 0,85 | 0,614 | 1,77E-07 | 6 |
| S100a62   | 1,08E-11 | 0,7  | 1    | 0,991 | 1,92E-07 | 6 |
| Cxcl2     | 1,68E-11 | 0,85 | 0,36 | 0,131 | 3,00E-07 | 6 |
| Aig1      | 1,86E-11 | 0,47 | 0,55 | 0,279 | 3,30E-07 | 6 |
| Serpine21 | 2,21E-11 | 1,06 | 0,77 | 0,475 | 3,94E-07 | 6 |
| Ank2      | 2,63E-11 | 0,51 | 0,68 | 0,382 | 4,68E-07 | 6 |
| Sgk1      | 3,98E-11 | 0,42 | 0,35 | 0,124 | 7,08E-07 | 6 |
| Gng11     | 4,40E-11 | 0,51 | 0,74 | 0,465 | 7,83E-07 | 6 |
| Epb41l2   | 8,21E-11 | 0,41 | 0,83 | 0,586 | 1,46E-06 | 6 |
| Fam110b   | 1,61E-10 | 0,32 | 0,43 | 0,176 | 2,87E-06 | 6 |
| Gda       | 1,72E-10 | 0,4  | 0,43 | 0,173 | 3,07E-06 | 6 |
| Serpinh11 | 1,77E-10 | 0,56 | 1    | 0,963 | 3,16E-06 | 6 |
| Timp32    | 2,79E-10 | 1,23 | 0,94 | 0,814 | 4,97E-06 | 6 |
| Lrp11     | 4,45E-10 | 0,54 | 0,9  | 0,784 | 7,93E-06 | 6 |
| Egr31     | 8,03E-10 | 0,71 | 0,52 | 0,257 | 1,43E-05 | 6 |
| Man2a11   | 8,14E-10 | 0,36 | 0,6  | 0,32  | 1,45E-05 | 6 |
| Matn2     | 1,08E-09 | 0,49 | 0,55 | 0,299 | 1,92E-05 | 6 |
| Igsf101   | 1,12E-09 | 0,36 | 0,53 | 0,258 | 1,99E-05 | 6 |
| Aldh1a32  | 1,21E-09 | 0,82 | 0,54 | 0,3   | 2,16E-05 | 6 |
| Nbeal11   | 1,64E-09 | 0,36 | 0,85 | 0,651 | 2,92E-05 | 6 |
| Xist1     | 2,07E-09 | 0,35 | 1    | 0,995 | 3,69E-05 | 6 |
| Clic4     | 2,17E-09 | 0,38 | 0,92 | 0,798 | 3,86E-05 | 6 |
| Marcks1   | 3,70E-09 | 0,53 | 0,98 | 0,881 | 6,60E-05 | 6 |



|            |          |      |      |       |          |   |
|------------|----------|------|------|-------|----------|---|
| Vmp11      | 5,55E-09 | 0,42 | 0,83 | 0,62  | 9,88E-05 | 6 |
| Il6st      | 7,40E-09 | 0,56 | 0,89 | 0,778 | 0,000132 | 6 |
| Tcf41      | 7,51E-09 | 0,44 | 1    | 0,986 | 0,000134 | 6 |
| Ccl7       | 7,55E-09 | 1,23 | 0,38 | 0,176 | 0,000134 | 6 |
| Socs3      | 8,06E-09 | 0,44 | 0,45 | 0,207 | 0,000144 | 6 |
| Bnc2       | 8,13E-09 | 0,39 | 0,64 | 0,393 | 0,000145 | 6 |
| Jak1       | 1,19E-08 | 0,3  | 0,98 | 0,894 | 0,000211 | 6 |
| Cebpd      | 1,51E-08 | 0,98 | 0,46 | 0,239 | 0,000268 | 6 |
| Tgm2       | 1,93E-08 | 0,53 | 0,54 | 0,312 | 0,000344 | 6 |
| Igf11      | 2,12E-08 | 0,84 | 0,91 | 0,833 | 0,000377 | 6 |
| Ifitm2     | 2,32E-08 | 0,47 | 0,98 | 0,973 | 0,000414 | 6 |
| Bzw2       | 2,76E-08 | 0,44 | 0,63 | 0,384 | 0,000491 | 6 |
| Fgfr11     | 3,50E-08 | 0,35 | 0,58 | 0,336 | 0,000623 | 6 |
| Aebp11     | 4,25E-08 | 0,37 | 1    | 0,998 | 0,000756 | 6 |
| Cavin1     | 4,50E-08 | 0,37 | 0,55 | 0,328 | 0,000801 | 6 |
| C1qtnf6    | 6,13E-08 | 0,38 | 0,47 | 0,253 | 0,001091 | 6 |
| Irf11      | 6,66E-08 | 0,61 | 0,51 | 0,278 | 0,001185 | 6 |
| Dot1l      | 7,61E-08 | 0,53 | 0,56 | 0,35  | 0,001355 | 6 |
| Spred1     | 8,39E-08 | 0,57 | 0,94 | 0,928 | 0,001494 | 6 |
| Synpo1     | 8,64E-08 | 0,35 | 0,53 | 0,291 | 0,001537 | 6 |
| Phldb1     | 9,26E-08 | 0,4  | 0,77 | 0,56  | 0,001648 | 6 |
| Ccnl11     | 1,19E-07 | 0,52 | 0,98 | 0,929 | 0,002118 | 6 |
| Tpm41      | 1,21E-07 | 0,35 | 0,98 | 0,912 | 0,002156 | 6 |
| Nfkbiz1    | 1,30E-07 | 0,54 | 0,86 | 0,691 | 0,002306 | 6 |
| Ifrd1      | 1,31E-07 | 0,53 | 0,71 | 0,502 | 0,002329 | 6 |
| Olfml31    | 1,53E-07 | 0,6  | 0,59 | 0,386 | 0,002729 | 6 |
| Noct       | 1,57E-07 | 0,38 | 0,44 | 0,22  | 0,00279  | 6 |
| Grn1       | 1,80E-07 | 0,35 | 0,97 | 0,872 | 0,003202 | 6 |
| Lrrk1      | 1,80E-07 | 0,33 | 0,4  | 0,198 | 0,003203 | 6 |
| Plpp3      | 1,88E-07 | 0,6  | 0,62 | 0,415 | 0,003342 | 6 |
| Emp11      | 2,32E-07 | 0,38 | 0,92 | 0,827 | 0,004138 | 6 |
| Tgfb2      | 2,33E-07 | 0,37 | 0,92 | 0,729 | 0,004145 | 6 |
| Fndc3b     | 2,33E-07 | 0,35 | 0,94 | 0,827 | 0,004146 | 6 |
| Tpm11      | 2,53E-07 | 0,52 | 0,87 | 0,781 | 0,004503 | 6 |
| Cdk6       | 2,62E-07 | 0,36 | 0,51 | 0,286 | 0,004673 | 6 |
| Tmem64     | 2,81E-07 | 0,46 | 0,56 | 0,35  | 0,004999 | 6 |
| Dab2       | 2,82E-07 | 0,35 | 0,44 | 0,223 | 0,005017 | 6 |
| Serpinb6a1 | 3,82E-07 | 0,34 | 0,95 | 0,882 | 0,006809 | 6 |
| Prep       | 4,16E-07 | 0,39 | 0,81 | 0,63  | 0,007407 | 6 |
| Prss23     | 6,49E-07 | 0,36 | 0,32 | 0,146 | 0,011549 | 6 |
| Kdm6b1     | 9,15E-07 | 0,36 | 0,9  | 0,786 | 0,016291 | 6 |
| Sept111    | 1,51E-06 | 0,37 | 0,91 | 0,773 | 0,026873 | 6 |
| Dcakd      | 1,68E-06 | 0,33 | 0,36 | 0,181 | 0,029966 | 6 |
| Bmp12      | 2,18E-06 | 0,45 | 0,62 | 0,406 | 0,038746 | 6 |
| Sema7a     | 2,69E-06 | 0,41 | 0,61 | 0,415 | 0,04792  | 6 |
| Sdc21      | 2,70E-06 | 0,58 | 0,59 | 0,41  | 0,047985 | 6 |

|           |            |      |      |       |          |   |
|-----------|------------|------|------|-------|----------|---|
| Malt1     | 3,39E-06   | 0,47 | 0,4  | 0,218 | 0,060343 | 6 |
| Skil      | 5,07E-06   | 0,34 | 0,82 | 0,655 | 0,090272 | 6 |
| Arl4a     | 1,18E-05   | 0,37 | 0,58 | 0,404 | 0,210232 | 6 |
| Fam102b   | 1,22E-05   | 0,31 | 0,48 | 0,297 | 0,217077 | 6 |
| Btg21     | 1,37E-05   | 0,36 | 0,85 | 0,685 | 0,244418 | 6 |
| Frmd6     | 1,42E-05   | 0,35 | 0,59 | 0,389 | 0,252537 | 6 |
| Parva     | 1,57E-05   | 0,34 | 0,54 | 0,356 | 0,279492 | 6 |
| Nfkbia    | 1,95E-05   | 0,81 | 0,72 | 0,628 | 0,346669 | 6 |
| Mmp21     | 2,50E-05   | 0,75 | 0,9  | 0,84  | 0,444587 | 6 |
| Fbln21    | 3,05E-05   | 0,34 | 0,98 | 0,921 | 0,542468 | 6 |
| Oaf1      | 3,19E-05   | 0,48 | 0,55 | 0,39  | 0,568524 | 6 |
| Efnb11    | 4,08E-05   | 0,39 | 0,45 | 0,298 | 0,726474 | 6 |
| Apbb21    | 4,11E-05   | 0,41 | 0,63 | 0,435 | 0,731923 | 6 |
| Atp2b1    | 4,60E-05   | 0,36 | 0,85 | 0,729 | 0,818594 | 6 |
| Nr4a1     | 4,78E-05   | 0,34 | 0,89 | 0,819 | 0,851822 | 6 |
| Copz2     | 5,03E-05   | 0,3  | 0,51 | 0,344 | 0,895941 | 6 |
| Thbs22    | 6,59E-05   | 0,42 | 0,46 | 0,297 | 1        | 6 |
| Sh3bgrl31 | 7,15E-05   | 0,31 | 0,97 | 0,885 | 1        | 6 |
| Rai14     | 8,93E-05   | 0,33 | 0,49 | 0,322 | 1        | 6 |
| Scd1      | 8,99E-05   | 0,31 | 0,71 | 0,585 | 1        | 6 |
| Ugdh      | 0,00010603 | 0,89 | 0,85 | 0,792 | 1        | 6 |
| Zfp361    | 0,00015104 | 0,35 | 0,86 | 0,736 | 1        | 6 |
| Nfkb1     | 0,00017994 | 0,5  | 0,72 | 0,573 | 1        | 6 |
| Neat12    | 0,00038997 | 0,38 | 1    | 0,995 | 1        | 6 |
| Errfi1    | 0,00052998 | 0,45 | 0,51 | 0,376 | 1        | 6 |
| ligp11    | 0,0005786  | 0,51 | 0,35 | 0,2   | 1        | 6 |
| Plxnd1    | 0,00059153 | 0,32 | 0,52 | 0,386 | 1        | 6 |
| Fem1b1    | 0,00066947 | 0,32 | 0,44 | 0,292 | 1        | 6 |
| Nr4a22    | 0,00079597 | 0,67 | 0,46 | 0,333 | 1        | 6 |
| Gpx31     | 0,00103901 | 0,57 | 0,66 | 0,519 | 1        | 6 |
| Map1lc3a  | 0,0011333  | 0,3  | 0,82 | 0,75  | 1        | 6 |
| Cebpb     | 0,00126276 | 0,56 | 0,41 | 0,292 | 1        | 6 |
| Postn1    | 0,00145673 | 0,41 | 0,89 | 0,795 | 1        | 6 |
| Atf32     | 0,00177338 | 0,34 | 0,47 | 0,31  | 1        | 6 |
| Arl5b1    | 0,00295535 | 0,34 | 0,82 | 0,779 | 1        | 6 |
| Bcr       | 0,00323892 | 0,32 | 0,53 | 0,409 | 1        | 6 |
| Cln5      | 0,00738486 | 0,34 | 0,52 | 0,389 | 1        | 6 |
| Crip1     | 0,0078424  | 0,43 | 0,97 | 0,933 | 1        | 6 |

es 1 and Extended  
adjusted p value

| <b>gene</b>   |
|---------------|
| Mlana         |
| Ptgds         |
| Car2          |
| Dct           |
| Pmel          |
| Slc45a2       |
| Car6          |
| Syng1         |
| Gstp1         |
| Cst6          |
| Gpmb          |
| Chchd10       |
| Lgals3        |
| Car14         |
| Sparcl1       |
| Hpse          |
| Gsta4         |
| Mcoln3        |
| Aebp1         |
| Fxyd3         |
| Cox6c         |
| Uba52         |
| Cox7c         |
| Lgals1        |
| Cox6a1        |
| Gm2115        |
| Ndufb2        |
| Cox7a2        |
| Apoe          |
| Enho          |
| Gjb6          |
| Cyb5a         |
| Cited1        |
| Hpgds         |
| Ndufa1        |
| Rps28         |
| Scrg1         |
| Cox4i1        |
| 2010107E04Rik |
| Cox7b         |
| Cd63          |
| Kcnj10        |

|               |
|---------------|
| Pla2g2e       |
| Uqcc2         |
| Cox6b1        |
| S100b         |
| Cryab         |
| Ppia          |
| Rpl35         |
| Uqcr11        |
| Cox5a         |
| Rasgrp3       |
| Atp5j2        |
| 5031439G07Rik |
| Adm           |
| Uqcr10        |
| Gpx2          |
| Ndufb4        |
| Vamp5         |
| Atp5j         |
| Uqcrb         |
| Slc25a4       |
| Rpl41         |
| Atp1b3        |
| Cox17         |
| Slc25a5       |
| Cox8a         |
| Tspan10       |
| Ndufc1        |
| Rpl32         |
| Glrb          |
| Plxnc1        |
| Atp5l         |
| Tmem256       |
| Nenf          |
| S100a1        |
| Ftl1          |
| Atp5k         |
| Tyr           |
| Rps25         |
| Atp5e         |
| Rpl37         |
| Rps23         |
| Rpl36         |
| Gjb2          |
| Rps7          |
| Cox5b         |
| Nceh1         |

|         |
|---------|
| Rpl37a  |
| C2      |
| Gm10076 |
| Uqcrh   |
| Vegfb   |
| Ctsb    |
| Ndufb9  |
| Rps27a  |
| Tomm7   |
| Nrp2    |
| Bace2   |
| Rps6    |
| Gsta1   |
| Uqcrq   |
| Rpl23a  |
| Rpl39   |
| Rplp2   |
| Oxct1   |
| Dkk3    |
| Idh2    |
| Rps13   |
| Mitf    |
| Rps17   |
| Ndufa13 |
| Gm3776  |
| Vamp8   |
| Rps18   |
| Atp5g2  |
| Rps29   |
| Rplp1   |
| Rps15a  |
| Cerk    |
| Rpl36a  |
| Ss18l2  |
| Ifitm3  |
| Tmem160 |
| Ndufb11 |
| Mif     |
| Rpl31   |
| Rpl18a  |
| Chchd2  |
| Eno1    |
| Rpl10a  |
| Mlph    |
| Atp5b   |
| Rpl11   |

|               |
|---------------|
| Ndufb5        |
| Atp6ap2       |
| Selenop       |
| Ndufb7        |
| Atp5h         |
| Rps2          |
| Ndufa7        |
| Rps16         |
| Ii10rb        |
| Sec11c        |
| Rps14         |
| Hint1         |
| Rpl35a        |
| 1810058I24Rik |
| Oaz1          |
| Ndufa4        |
| Rps15         |
| Rnf7          |
| Rpl6          |
| Gpx4          |
| Atp1a1        |
| Rpl10         |
| Bri3          |
| Nipal3        |
| Rpl22I1       |
| Rpl34         |
| Rpl13         |
| Rpl23         |
| Park7         |
| Eef1a1        |
| Rps9          |
| Atp6v1f       |
| Pole4         |
| Glul          |
| Sem1          |
| Mrpl52        |
| Cox14         |
| Atp5c1        |
| Psen2         |
| Timp2         |
| Ndufa3        |
| Acyp2         |
| Atp5g3        |
| Atp5o.1       |
| Rab27a        |
| Ndufa2        |

|               |
|---------------|
| Scn8a         |
| Ndufa5        |
| Chd3          |
| Ndufb10       |
| Slc12a2       |
| Atp5g1        |
| Ndufs6        |
| Spg21         |
| Usmg5         |
| 2410015M20Rik |
| Ndufa11       |
| Ndufb8        |
| Rpl27         |
| Mrps21        |
| Ifi27         |
| Nop10         |
| Rpl13a        |
| Agt           |
| Lsm4          |
| Npnt          |
| Minos1        |
| Fmc1          |
| Anapc13       |
| Met           |
| Cyp4b1        |
| Ednrb         |
| Atp1b1        |
| Olfm2         |
| Fuom          |
| Ctsd          |
| Mrps33        |
| Bmyc          |
| Gstp2         |
| Churc1        |
| Rlbp1         |
| Smim4         |
| Mest          |
| Wnt4          |
| Fn1           |
| Akap12        |
| Sema5a        |
| Trf           |
| Slc29a1       |
| Csn3          |
| Kctd12        |
| Emilin1       |

|           |
|-----------|
| Postn     |
| Sema3d    |
| Dhh       |
| Igf1      |
| Moxd1     |
| Lmcd1     |
| Cd200     |
| Fibin     |
| Igfbp4    |
| Aqp1      |
| Qpct      |
| Thsd7a    |
| Mgp       |
| Lbhd2     |
| Timp1     |
| Cavin2    |
| Plvap     |
| Enpp2     |
| Serpina3n |
| Spry4     |
| Gja1      |
| Ltbp1     |
| Tmem37    |
| Tmem158   |
| Tm4sf1    |
| Gsn       |
| Egfl8     |
| Sulf2     |
| Fxyd5     |
| Col11a1   |
| Ch1       |
| Ephx1     |
| Bpgm      |
| Spon1     |
| Abcg2     |
| Sdc4      |
| Fth1      |
| Itgb5     |
| Cxxc4     |
| Egflam    |
| Snhg18    |
| Gpm6b     |
| Itga2     |
| Tgfb2     |
| Sep-11    |
| Pnp       |



|         |
|---------|
| Actb    |
| Adamts1 |
| Ajap1   |
| Dtx4    |
| Crot    |
| Dbi     |
| Plpp1   |
| Syt11   |
| Thbs1   |
| Mmp16   |
| Ccnd2   |
| Limd1   |
| Morc4   |
| Cxxc5   |
| Nt5e    |
| Capn5   |
| Igsf10  |
| Fblim1  |
| Mcam    |
| Cdkn2b  |
| Adgra2  |
| Folr2   |
| Tfap2b  |
| Cd9     |
| Kcnn4   |
| Tnfaip2 |
| Lrp12   |
| Kif26b  |
| Npr1    |
| Sox2    |
| Sema3b  |
| Cd81    |
| Tmsb4x  |
| Efhd1   |
| Art3    |
| Sema3f  |
| Myof    |
| Chpf    |
| Glg1    |
| Me2     |
| Gm26778 |
| Wfdc1   |
| Suco    |
| Ltbp3   |
| Gnai2   |
| Cald1   |

|          |
|----------|
| Cdkn2a   |
| Ppp2r2b  |
| Gfra1    |
| Pcdh18   |
| Myo10    |
| Slc25a34 |
| Hmcn1    |
| Rgs2     |
| Gnb4     |
| Oxr1     |
| S100a6   |
| Tbx3     |
| Grasp    |
| Elovl5   |
| Camk2b   |
| Creb3l2  |
| Plec     |
| Ptpn13   |
| Aak1     |
| Mef2c    |
| S100a16  |
| Ano8     |
| Timp3    |
| Aldh1a3  |
| Prnp     |
| Fabp7    |
| Khl13    |
| Lypd6    |
| Neto2    |
| Fam89a   |
| Cd38     |
| Sh3bp5   |
| Fam212b  |
| Pam      |
| Xylt1    |
| Zcchc24  |
| Vim      |
| Olfml3   |
| Phlda3   |
| Dennd2a  |
| Antxr1   |
| Cd59a    |
| Gfra2    |
| Nkd2     |
| Cdkn1a   |
| Dlgap1   |

|          |
|----------|
| Tppp3    |
| Cyb5r3   |
| Mdfic    |
| Rnd3     |
| Tmem26   |
| Hip1     |
| Dap      |
| Dag1     |
| Arpc1b   |
| Pdgfa    |
| Stard8   |
| Cpe      |
| Calu     |
| Tead2    |
| Spata13  |
| Rhoj     |
| Casc4    |
| Ehd1     |
| Samd4    |
| Tbx3os1  |
| Tcaf1    |
| Tlr3     |
| Insr     |
| Hk1      |
| Adam12   |
| Nudt4    |
| Orai1    |
| Fkbp5    |
| Gab2     |
| Ppp1r18  |
| Gpr155   |
| Itgav    |
| Calm2    |
| Pls3     |
| Ubash3b  |
| Scn1b    |
| Plcb1    |
| Fgfr1    |
| Tmem82   |
| Nes      |
| Fkbp14   |
| Cdc42bpa |
| Fgd6     |
| Net1     |
| Nmnat2   |
| Arhgef9  |

|               |
|---------------|
| Lrrc58        |
| Svil          |
| Ggta1         |
| Lmo4          |
| Sh3rf1        |
| Shf           |
| Plekhb1       |
| Nf1           |
| Rftn2         |
| Rims1         |
| Atp6v0e       |
| Tnfaip8       |
| Pcdh9         |
| Cask          |
| Cavin3        |
| Mmp15         |
| Smtn          |
| Abcg1         |
| Tmx4          |
| 1700025G04Rik |
| Hs2st1        |
| Nck2          |
| Ptprz1        |
| Ints3         |
| Mfge8         |
| Me1           |
| Tmem176a      |
| Arl5a         |
| Epdr1         |
| Rcn3          |
| Cmtm5         |
| Kcna2         |
| Alcam         |
| Psd3          |
| Adk           |
| Sema3e        |
| Amot1         |
| Pxdn          |
| Sema6d        |
| 4931406C07Rik |
| Cnp           |
| Fbln2         |
| Hbegf         |
| Sdc2          |
| Mtus1         |
| Ppm1f         |

|            |
|------------|
| Stim1      |
| Fstl1      |
| Cpd        |
| S1pr3      |
| Hhla1      |
| Cp         |
| Maged2     |
| Nr4a2      |
| Bmp1       |
| St3gal2    |
| Pik3r1     |
| Lgr4       |
| Chst11     |
| Ybx3       |
| Tmc6       |
| Thbs2      |
| Pim3       |
| Plat       |
| Sh2b3      |
| Nfatc2     |
| Cfh        |
| Ptn        |
| Mt3        |
| Flrt3      |
| Egr1       |
| Fos        |
| S100a10    |
| Apold1     |
| Fez1       |
| Klf2       |
| Ier2       |
| Kcnma1     |
| Hmgcs1     |
| Zfp36      |
| Luc7l2     |
| Xist       |
| AC149090.1 |
| Mkln1      |
| Fus        |
| Kcnq1ot1   |
| Gm26699    |
| Taf1d      |
| Ubn2       |
| Ogt        |
| Lncpint    |
| Neat1      |

|         |
|---------|
| Nktr    |
| Nfat5   |
| Rapgef4 |
| Malat1  |
| Son     |
| Fbxl7   |
| Mertk   |
| Rsrp1   |
| Sec14l5 |
| Nav1    |
| Ttc14   |
| Tsix    |
| Pax3    |
| Nav2    |
| Zc3h7a  |
| Arglu1  |
| Pnir    |
| Ddx17   |
| Rapgef3 |
| Rbm25   |
| Krit1   |
| Tra2a   |
| Gm26917 |
| Tia1    |
| Sfpq    |
| Snrnp70 |
| Nisch   |
| Tecpr1  |
| Tnpo3   |
| Cnot4   |
| Srrm2   |
| Apod    |
| Zbtb20  |
| Ccnl1   |
| Ccnl2   |
| Cpsf6   |
| Zcchc7  |
| Dst     |
| Ube2d3  |
| Fubp1   |
| Cspp1   |
| Etl4    |
| Phc3    |
| Etv1    |
| Sorbs1  |
| Ank3    |

|               |
|---------------|
| Setd5         |
| Tet2          |
| Stox2         |
| Ewsr1         |
| Rbm39         |
| Psma3         |
| Hnrnp1        |
| Arhgap31      |
| Srsf11        |
| Atrx          |
| Cped1         |
| Chka          |
| 2010111I01Rik |
| Etnk1         |
| Sbno2         |
| Col3a1        |
| Mga           |
| Jmjd1c        |
| Rufy3         |
| BC005561      |
| 4930402H24Rik |
| Pick1         |
| Prpf38b       |
| Bclaf1        |
| Trpm7         |
| Mau2          |
| Smg1          |
| Pabpn1        |
| Cdc14a        |
| Ocl           |
| Slc25a36      |
| Htt           |
| Iqgap1        |
| Fchsd2        |
| Srek1         |
| Clk1          |
| Mical3        |
| Rictor        |
| Ankrd17       |
| Dlc1          |
| Asxl2         |
| Tnrc6b        |
| Mat2a         |
| R3hdm1        |
| Lyst          |
| AY036118      |

|         |
|---------|
| Ccl8    |
| Gm20619 |
| Ash1l   |
| Ikbkb   |
| Ddx5    |
| Prpf4b  |
| Appl2   |
| Chd9    |
| Pan3    |
| Mob1b   |
| Gjc3    |
| Rasa2   |
| Ppp1r9a |
| Mdm4    |
| Polg    |
| Ahnak2  |
| Srsf5   |
| Uhrf2   |
| Prpf39  |
| Clk4    |
| Ankrd28 |
| Nsd2    |
| Smc5    |
| Col1a2  |
| Pds5a   |
| Phf20l1 |
| Mar-07  |
| Phip    |
| Atxn2   |
| Hjurp   |
| Ankrd12 |
| Ppp6r3  |
| Safb2   |
| Itga4   |
| Rbm5    |
| Zzef1   |
| Bicd1   |
| Celf2   |
| Gm26518 |
| Tmcc1   |
| Tra2b   |
| Trim24  |
| Fam208a |
| Cdc37l1 |
| Akr1b10 |
| Sltm    |



|               |
|---------------|
| Plekha5       |
| Brd8          |
| Leng8         |
| Zeb2          |
| Emsy          |
| Sema6a        |
| Cdip1         |
| Herc1         |
| Map4k4        |
| 4932438A13Rik |
| Hpgds         |
| Ptpns         |
| Rbm26         |
| Setd2         |
| Fgd4          |
| Tmem209       |
| Sfswap        |
| Matr3         |
| Celf1         |
| Clock         |
| Camk2d        |
| Slc38a2       |
| Lrp6          |
| Zfp292        |
| Zfp644        |
| Hnrnp1        |
| Arl5b         |
| Zcchc11       |
| Phkb          |
| Hmga2         |
| Git2          |
| Zswim8        |
| Thoc2         |
| Mitf          |
| Pbx1          |
| Nbea          |
| Tmem87b       |
| Nbeal1        |
| 5031425E22Rik |
| Tet3          |
| Cnot1         |
| Plekha1       |
| Ddx3x         |
| Spopl         |
| Tbc1d23       |
| Dicer1        |

|               |
|---------------|
| Tcf4          |
| Nsd1          |
| Fam193a       |
| Chd6          |
| Kmt5b         |
| Ubap2l        |
| Camkk2        |
| Braf          |
| Tmem260       |
| Nup98         |
| Dmx1          |
| Fmn1          |
| Zmym5         |
| Cpeb4         |
| Tef           |
| Pikfyve       |
| Atp6v1b2      |
| Srsf3         |
| Mcc           |
| Pde11a        |
| Maml3         |
| Cttnbp2       |
| Kdm2a         |
| Nrip1         |
| Zfhx4         |
| Ankrd10       |
| Zfp445        |
| Ivns1abp      |
| Rbm6          |
| Birc6         |
| Gcn11l        |
| AI314180      |
| Tnik          |
| Gpatch8       |
| Agk           |
| Ccnt2         |
| Pcnx          |
| Trps1         |
| Pcgf5         |
| Nsd3          |
| Strn3         |
| Dennd1b       |
| Pcf11         |
| D5Erttd579e   |
| 2810474O19Rik |
| Dcn           |

|          |
|----------|
| Plppb    |
| Ddhd1    |
| Ccnt1    |
| Kmt2c    |
| Gls      |
| Mllt10   |
| Npc1     |
| Sbf2     |
| Usp53    |
| Itch     |
| Sbno1    |
| Gria3    |
| Trmt1    |
| Tardbp   |
| Rb1cc1   |
| Akap8l   |
| Brwd1    |
| Nfkbiz   |
| Usp24    |
| Zfp638   |
| Cuedc1   |
| Kdm5a    |
| Rc3h2    |
| Bcl2     |
| Cdc42bpa |
| Eya1     |
| Tsc22d2  |
| Dnmt3a   |
| Mmp16    |
| Tead1    |
| Frmd4a   |
| Rbpms    |
| Gm37494  |
| Csnk1g1  |
| Mark3    |
| Fam120b  |
| Lama4    |
| Paxbp1   |
| Mapk8    |
| Stk38    |
| Apaf1    |
| Atat1    |
| Zkscan3  |
| Gm26532  |
| Nrbp2    |
| Pde4d    |

|               |
|---------------|
| Fosb          |
| Mbtd1         |
| Mdm2          |
| E530011L22Rik |
| 2810403A07Rik |
| Pcdhb19       |
| Ptbp2         |
| Pigm          |
| Wsb1          |
| Snhg11        |
| Slc22a15      |
| ligp1         |
| Gbp4          |
| Gbp2          |
| Cxcl10        |
| Igtp          |
| Ifit3         |
| Gbp3          |
| Psmb8         |
| Stat1         |
| H2-K1         |
| Ifi47         |
| Gm4951        |
| Ifit1         |
| H2-Q7         |
| H2-T23        |
| Irgm1         |
| F830016B08Rik |
| Parp12        |
| Isg15         |
| Bst2          |
| Oasl2         |
| Psmb10        |
| Tgtp2         |
| H2-Q4         |
| Parp14        |
| Tmem140       |
| Psmb9         |
| Cd274         |
| Gbp6          |
| H2-D1         |
| Gbp7          |
| Zbp1          |
| Herc6         |
| Xaf1          |
| H2-T22        |

|                |
|----------------|
| Irgm2          |
| Gbp9           |
| Dtx3l          |
| H2-Q6          |
| Tap1           |
| B2m            |
| Nlrc5          |
| Rtp4           |
| Rnf213         |
| Gbp5           |
| Trim12a        |
| Parp9          |
| Trim30d        |
| Usp18          |
| Stat2          |
| Batf2          |
| 9930111J21Rik2 |
| Il12rb1        |
| Ciita          |
| Ifih1          |
| Il18bp         |
| Irf7           |
| Olfir56        |
| Ube2l6         |
| Serpina3g      |
| Irf1           |
| Tap2           |
| Trim30a        |
| Rsad2          |
| Samhd1         |
| Ifit3b         |
| H2-DMa         |
| Psme1          |
| H2-Ab1         |
| H2-Eb1         |
| Ifitm3         |
| H2-Aa          |
| Samd9l         |
| H2-M3          |
| Psme2          |
| Ddx60          |
| Tapbp          |
| H2-DMb1        |
| Parp10         |
| Lgals3bp       |
| Trim12c        |

|         |
|---------|
| Sln5    |
| Lgals9  |
| Trim34a |
| Ifi35   |
| Trafd1  |
| Eif2ak2 |
| Tvp23a  |
| Cd47    |
| Erap1   |
| Nampt   |
| Mkl     |
| Cd74    |
| Irf9    |
| Tmsb10  |
| C2      |
| Nmi     |
| Ddx58   |
| Znfx1   |
| Parp11  |
| Trim25  |
| Clec2d  |
| Casp12  |
| Vwa5a   |
| Zc3hav1 |
| Lap3    |
| Csf1    |
| Parp3   |
| Ifit2   |
| Idnk    |
| Snx10   |
| C4b     |
| Fabp5   |
| Tubb3   |
| Art3    |
| Irf8    |
| Tor3a   |
| Tlr3    |
| Pfcp    |
| Rnf114  |
| Grn     |
| Usp25   |
| Ccl5    |
| Fchsd2  |
| Pla2g16 |
| Enpp2   |
| Ahnak   |

|               |
|---------------|
| Pmel          |
| Pltp          |
| Serpine2      |
| Vcan          |
| Nes           |
| Gpx3          |
| Mdm2          |
| Siva1         |
| Btc           |
| Carhsp1       |
| 1700007K13Rik |
| Cald1         |
| Dcxr          |
| Itga6         |
| Celf5         |
| Pam           |
| Sdc1          |
| Man2b1        |
| Espn          |
| Pmm1          |
| Cdkn1a        |
| Ak1           |
| Kdm7a         |
| Zfp385a       |
| Mybl1         |
| Ahnak2        |
| Notch3        |
| Ccng1         |
| Plxdc2        |
| Dnajc9        |
| Cep170b       |
| Il11          |
| Crip2         |
| Palm3         |
| Ctxn1         |
| Pde3b         |
| Angptl2       |
| Ptprt         |
| Agpat4        |
| Ift27         |
| Rnase4        |
| Gtse1         |
| Fas           |
| Creb3l1       |
| Axl           |
| Ahi1          |

|               |
|---------------|
| Lph           |
| Akr1b10       |
| Ercc5         |
| Dusp15        |
| Fosl1         |
| Ubxn1         |
| Baiap2        |
| Klhl26        |
| Dgka          |
| Rps27l        |
| Tacc2         |
| Msh6          |
| Rap2a         |
| Nme4          |
| Casp3         |
| Ei24          |
| Eda2r         |
| Wdr35         |
| Zmat3         |
| Pcgf3         |
| Prrc2b        |
| Trim7         |
| Cyr61         |
| Ano3          |
| Tnks2         |
| Cpt1c         |
| Polk          |
| Nrp1          |
| Frmd4b        |
| Fbxw9         |
| Anks1b        |
| Gtf3c1        |
| 2600006K01Rik |
| Ddit4l        |
| Cad           |
| Abhd4         |
| Tmem184c      |
| Fam19a5       |
| Plxna1        |
| Slc22a23      |
| Ptpn14        |
| Ppp1r14b      |
| Glrx3         |
| Fam216a       |
| Mlec          |
| Tmem63b       |



|           |
|-----------|
| Tbc1d8    |
| Sym       |
| Arl4c     |
| Tap1      |
| Thyn1     |
| Pidd1     |
| Tnfrsf10b |
| Dgki      |
| Zfpm1     |
| Mcm7      |
| Pqlc3     |
| Cd109     |
| Crabp2    |
| Tpp1      |
| Ass1      |
| Vopp1     |
| Slc2a9    |
| Igdcc4    |
| Kank3     |
| Plekha7   |
| Scand1    |
| Serinc3   |
| Samd12    |
| Dcaf4     |
| Tnfrsf18  |
| Ptp4a2    |
| Efnb2     |
| Pde5a     |
| Azin2     |
| Icam1     |
| Pitpm2    |
| Chst3     |
| Cercam    |
| Rbm38     |
| Slc19a2   |
| Ano1      |
| Slc37a2   |
| Slc27a3   |
| Tubb6     |
| Bcam      |
| Cgref1    |
| Arhgap28  |
| Cox6b2    |
| Slitrk5   |
| Ddias     |
| Spc25     |

|           |
|-----------|
| Sp9       |
| Osbpl5    |
| Igsf9b    |
| Ppp1r13l  |
| Tcea3     |
| Nxn       |
| Reep2     |
| Mical2    |
| Frrs1     |
| Trp53inp1 |
| Nt5dc2    |
| Dzip1     |
| Susd6     |
| Ttc28     |
| Arhgap11a |
| Ier5      |
| Hmg20b    |
| Mapre1    |
| Gtf3a     |
| Pdgfa     |
| Canx      |
| Bax       |
| Rb1       |
| Homer3    |
| Sulf2     |
| Nudcd2    |
| P2rx7     |
| Akap13    |
| Sesn2     |
| Ngfr      |
| Dgkh      |
| Stk38l    |
| Ctsf      |
| Nkain2    |
| Sox4      |
| Nucks1    |
| Trim24    |
| Gdnf      |
| Gm16286   |
| Arl8a     |
| Ncor2     |
| Steap3    |
| Ppm1a     |
| Peak1     |
| Ubl3      |
| Btg2      |

|          |
|----------|
| Rnf169   |
| Btg1     |
| Micall1  |
| Pak3     |
| Nfic     |
| Cpne2    |
| Utp20    |
| Mar-05   |
| Pgl3     |
| Mpp7     |
| Def6     |
| Acox3    |
| Ube2i    |
| Fat1     |
| Parvb    |
| Cdc42bpg |
| Phf2011  |
| Cenpt    |
| Dstn     |
| Map3k20  |
| Pten     |
| Akap1    |
| Il15     |
| Slc35d1  |
| Dusp14   |
| Agap1    |
| Tmbim1   |
| Rtkn     |
| Itpr1    |
| Glis3    |
| Mapkbp1  |
| Naa40    |
| Lgr6     |
| Thra     |
| Piezo1   |
| Gfer     |
| Bscl2    |
| Hras     |
| Cdc34    |
| Mettl6   |
| Srgap3   |
| Mgmt     |
| Rgs12    |
| Luzp1    |
| Ptp4a1   |
| Bin1     |

|          |
|----------|
| Odf2     |
| N4bp1    |
| Aldh4a1  |
| Ablim1   |
| Bloc1s2  |
| Arpc2    |
| Rps19    |
| H2afj    |
| Csnk1g1  |
| Fam212b  |
| Timp3    |
| Itga8    |
| Qpctl    |
| Pitpnc1  |
| Limch1   |
| Rpl19    |
| Pa2g4    |
| Arhgap23 |
| Lnpep    |
| Aen      |
| Aaas     |
| Aprt     |
| Dusp10   |
| Scoc     |
| Apaf1    |
| Rnf187   |
| Dnajb1   |
| Exoc4    |
| Heca     |
| Nrip1    |
| Tubb4b   |
| Itm2a    |
| Srp72    |
| Hmga2    |
| Tmbim4   |
| Rad9a    |
| Pdrg1    |
| Txn1     |
| Slc39a7  |
| Hmga1    |
| Tmem127  |
| Cpped1   |
| Mmp15    |
| Tpm1     |
| Ptpdc1   |
| Esd      |

|               |
|---------------|
| Emp1          |
| Pcdh7         |
| Ctnnal1       |
| Abhd14a       |
| Rps3          |
| Lmna          |
| Sfmbt1        |
| Vps41         |
| Tmem5         |
| Adcy7         |
| Cast          |
| Ndufab1       |
| Ppp2r5d       |
| Sh2b1         |
| Klhl8         |
| Col27a1       |
| Sac3d1        |
| Trib1         |
| Psrc1         |
| Ier5l         |
| Dennd2c       |
| Bmt2          |
| Glrx5         |
| Sgsm2         |
| Fuca1         |
| 1110012L19Rik |
| Tmem184b      |
| Smad3         |
| Pdzrn3        |
| Ypel3         |
| Tet1          |
| Ccs           |
| Phlda3        |
| Pabpc1        |
| Ggct          |
| Yeats2        |
| Plxnb2        |
| Irx5          |
| Rab23         |
| Ndufb6        |
| Rev1          |
| Mak16         |
| Atp13a2       |
| Tanc2         |
| Stard5        |
| Pigf          |

|          |
|----------|
| Prkaa2   |
| Plppb    |
| Ifngr2   |
| Acadvl   |
| Tchp     |
| Cmip     |
| Kif13a   |
| Ppm1d    |
| Hprt     |
| Mthfd1   |
| Ktn1     |
| Nudt5    |
| Stard10  |
| Rpe      |
| Rps11    |
| Gse1     |
| Pml      |
| Trafd1   |
| Plekhh2  |
| Cers4    |
| Rbm17    |
| Apbb2    |
| Tmem43   |
| Arl13b   |
| Maf      |
| Tmem38a  |
| Trim11   |
| Ampd2    |
| Atf3     |
| Zyx      |
| Rab40c   |
| Cby1     |
| Tax1bp1  |
| Arhgap35 |
| Exoc7    |
| Erich1   |
| Lamb1    |
| Zfp703   |
| L3mbtl3  |
| Ckap2    |
| Slc5a3   |
| Adarb1   |
| Tgif1    |
| Emd      |
| Wwp1     |
| Efnb1    |

|          |
|----------|
| Serinc5  |
| Wrap73   |
| Mxra7    |
| Tpst2    |
| Pcx      |
| Ptk2b    |
| Dctn4    |
| Fam210b  |
| Wdr61    |
| Arhgap21 |
| Dlgap4   |
| Cep250   |
| Gss      |
| Meis2    |
| Marcks   |
| Msi2     |
| Vkorc1   |
| Kif1c    |
| Spsb1    |
| Eed      |
| Lrp1     |
| Rhob     |
| Calhm2   |
| Atxn10   |
| Vangl1   |
| Nfyb     |
| Psme4    |
| Inpp5f   |
| Spry2    |
| Ssbp3    |
| Iffo2    |
| Mkrn1    |
| Nfix     |
| Commd3   |
| Vwa1     |
| Sbk1     |
| Pbxip1   |
| Eng      |
| Ccdc148  |
| Ptma     |
| Elmo2    |
| Irf2bp2  |
| Pom121   |
| Knop1    |
| Rps17    |
| Ephx1    |

|          |
|----------|
| Nrep     |
| Txn14a   |
| Lage3    |
| Akr1b8   |
| Dopey1   |
| Kcna6    |
| Pdia3    |
| Pdcd6ip  |
| Rrp36    |
| Lif      |
| Sox2     |
| Adgra1   |
| Ppil3    |
| Zfp688   |
| Tnpo2    |
| Golgb1   |
| Lsm2     |
| Limk2    |
| Angpt2   |
| Hnrnpf   |
| Tshz1    |
| Tnks     |
| Frmd4a   |
| Upp1     |
| Rchy1    |
| Man2a1   |
| Synpo    |
| Ptprg    |
| Jmjd1c   |
| Rlf      |
| Rcan1    |
| Twf1     |
| Itm2c    |
| Runx1    |
| Eif4ebp2 |
| Zfp365   |
| Enc1     |
| Map2k3   |
| Ctsd     |
| Cd9      |
| Brix1    |
| Dgkz     |
| Hyal1    |
| Stox2    |
| Myo9b    |
| Marcks11 |



|          |
|----------|
| Cln8     |
| Map2k4   |
| Fam160a2 |
| Prpf8    |
| Kmt2a    |
| Plaur    |
| Gm26735  |
| Fam214a  |
| Ubash3b  |
| Adk      |
| Trim3    |
| Nradd    |
| Fam89a   |
| Slc39a10 |
| Nipbl    |
| Egr1     |
| Esrra    |
| Zfp874a  |
| Slc39a6  |
| Dgkq     |
| Osbpl6   |
| Foxp2    |
| Scap     |
| Cdyl     |
| Zcchc6   |
| Repin1   |
| Rnf149   |
| Atf7ip   |
| Fkbp9    |
| Csf1     |
| Clpb     |
| Gm15417  |
| Fbxl20   |
| Eid1     |
| Krit1    |
| Tnfaip2  |
| Gne      |
| Gria3    |
| Jund     |
| Stx3     |
| Iffo1    |
| Gsk3b    |
| Glud1    |
| Bbc3     |
| Inf2     |
| Stk11    |

|               |
|---------------|
| Pkp2          |
| Gltf          |
| Rbpj          |
| Arhgef40      |
| Eif3f         |
| Jun           |
| Dctn1         |
| Hpcal1        |
| Hmox1         |
| Fam120a       |
| Ctc1          |
| S100a10       |
| Thbs2         |
| Mast4         |
| Dbi           |
| Utrn          |
| Cyba          |
| Ogfr1         |
| 1500009L16Rik |
| Dab2ip        |
| Frdm8         |
| Sdhaf1        |
| Bet1l         |
| Ddr1          |
| Sh3yl1        |
| Mier1         |
| Prps2         |
| Rnf4          |
| Rala          |
| Fah           |
| Exoc2         |
| Khlh22        |
| Apc           |
| Tpd52         |
| Ddit4         |
| Otud4         |
| Plxna2        |
| Usp2          |
| Ybx1          |
| Pacs1         |
| Ccdc86        |
| Slc33a1       |
| Plec          |
| Il6ra         |
| Pak2          |
| Eno2          |

|           |
|-----------|
| Wdr91     |
| Rpl9      |
| Ubc       |
| Sema6d    |
| Blcap     |
| Bmp1      |
| Camsap1   |
| Csdc2     |
| Npepps    |
| Map4k4    |
| Bach1     |
| Capg      |
| Agpat5    |
| Cttnbp2nl |
| Plod2     |
| Ado       |
| Pard6g    |
| Akap9     |
| Ythdc1    |
| Ndufc2    |
| Eif4ebp1  |
| Fam214b   |
| Zcchc11   |
| Akr1b7    |
| Fam168a   |
| F8a       |
| Rnf181    |
| Rbms1     |
| Bcl10     |
| Rack1     |
| Mrps6     |
| Tor1b     |
| Hspg2     |
| App1      |
| Lpin1     |
| Msn       |
| Cltb      |
| Parp10    |
| Map7      |
| Pcnp      |
| Zwint     |
| Med13l    |
| Dalrd3    |
| Spr       |
| Rest      |
| Fam126a   |

|          |
|----------|
| Dlg5     |
| Nbea     |
| Mgat2    |
| Pros1    |
| Ywhag    |
| Rabgap1  |
| Atpif1   |
| Npr2     |
| Pak1     |
| Mmp2     |
| Nsmaf    |
| Sidt2    |
| Sin3b    |
| Cxxc4    |
| Flrt3    |
| Smad2    |
| Ptbp3    |
| Slc12a4  |
| Rorb     |
| Ino80b   |
| Mprp     |
| Mmd      |
| Nat6     |
| Pvt1     |
| Khlh21   |
| Hectd1   |
| Tmem19   |
| Sh3pxd2a |
| Gas7     |
| Cic      |
| Dennd5a  |
| Bmpr2    |
| Itpril2  |
| Mob1b    |
| Ric1     |
| Zmiz1    |
| Nomo1    |
| Fam129b  |
| Leng1    |
| Izumo4   |
| Hmgn1    |
| Tmem120a |
| Nwd2     |
| Srxn1    |
| Aldh1a3  |
| Stab1    |

|           |
|-----------|
| Ldhb      |
| Agap3     |
| Arap2     |
| Greb1     |
| Alcam     |
| Mfsd1     |
| Rfx7      |
| Mex3b     |
| Reep3     |
| Emp3      |
| Serpinh1  |
| Chic2     |
| Fam32a    |
| Mkl2      |
| Vmp1      |
| Nubp1     |
| Fam124a   |
| Add2      |
| Hist1h4h  |
| Egr2      |
| Ssna1     |
| Rcbtb1    |
| Taldo1    |
| Scarb2    |
| Cep164    |
| D17Wsu92e |
| Vps28     |
| Nudt3     |
| Zfp281    |
| Rab18     |
| Foxo3     |
| Rasal2    |
| Lasp1     |
| Thoc7     |
| Slc35e4   |
| Ski       |
| Capzb     |
| Serpnb6a  |
| Fbxw7     |
| Smad7     |
| Yif1a     |
| Tfap2a    |
| Cap1      |
| Slc24a5   |
| Dennd2a   |
| Tnfaip1   |

|          |
|----------|
| Hipk1    |
| Eef1b2   |
| Herc2    |
| Gria4    |
| Phf8     |
| Sash1    |
| Acap2    |
| Zbtb43   |
| Hexim1   |
| Dusp5    |
| Bcl2l11  |
| Arhgef3  |
| Folr2    |
| Mapk8ip3 |
| Mboat7   |
| Prkd3    |
| Agtpbp1  |
| Adgre5   |
| Dda1     |
| Slc25a17 |
| Creb5    |
| Nr3c1    |
| Leo1     |
| Abca1    |
| Gigyf2   |
| Rapgef6  |
| Ctsh     |
| Snx16    |
| Abcf2    |
| Ppp1r15a |
| Yipf3    |
| Id2      |
| Gstk1    |
| Ccdc88a  |
| Yy1      |
| Fam53b   |
| Ppp1r14c |
| Dcaf7    |
| Mbd5     |
| Xrn2     |
| Hdac5    |
| Ccdc34   |
| Zfp644   |
| Ghr      |
| Dbn1     |
| Agrn     |

|               |
|---------------|
| Fem1b         |
| Sap30bp       |
| Arrdc3        |
| Ptbp1         |
| Eps15         |
| Me2           |
| Pcnx          |
| Fam135a       |
| Pxn           |
| Prkag1        |
| Ppp1r35       |
| Rab21         |
| Cpd           |
| Ccser2        |
| Slc6a6        |
| Txndc9        |
| Nr4a2         |
| Mtus1         |
| Nr1d1         |
| Msl3          |
| Sipa1l2       |
| Rnd3          |
| Zfhx4         |
| Edem1         |
| Kdm6b         |
| Poglut1       |
| Wwtr1         |
| Dmwd          |
| D430042O09Rik |
| Gxylt1        |
| Tmx4          |
| Ssbp2         |
| Prpf19        |
| Eif5b         |
| Nudt22        |
| Shisa4        |
| Ckap4         |
| Cdkn2c        |
| Gclc          |
| Zfhx3         |
| Rnmt          |
| Garnl3        |
| Uhrf2         |
| Bfsp2         |
| Cbfb          |
| Tnfrsf12a     |

|          |
|----------|
| Pnrc1    |
| Rbbp6    |
| Tgfb2    |
| Map4k3   |
| Tbc1d24  |
| Mib1     |
| Ubald2   |
| Fos      |
| Gsn      |
| Col18a1  |
| Adh5     |
| H2-Eb1   |
| Cadm1    |
| Hipk3    |
| Pdim4    |
| Pvr      |
| Tuba1c   |
| Odc1     |
| Ppil2    |
| Psmc1    |
| Junb     |
| Klf9     |
| Acbd5    |
| Mcrip1   |
| S100a6   |
| Oaf      |
| Prag1    |
| Spty2d1  |
| Igsf3    |
| Mid1ip1  |
| Sh3bgrl3 |
| Stim1    |
| Pold4    |
| Egr3     |
| Jag1     |
| Acvrl1   |
| Ptp4a3   |
| Rgmb     |
| Nsrp1    |
| Ahnak    |
| Cited2   |
| Sf3b4    |
| Trio     |
| Rasa1    |
| Cstb     |
| Fxyd5    |



|               |
|---------------|
| Slc30a4       |
| Abl2          |
| Myof          |
| 5031425E22Rik |
| Fosb          |
| Plat          |
| Pgap2         |
| Klf6          |
| Klf4          |
| Matn4         |
| Hbegf         |
| Ednrb         |
| Hist1h1c      |
| Prdx1         |
| Timp1         |
| Bnip3         |
| Ldha          |
| Aldoa         |
| Mif           |
| Gpr137b       |
| Tpi1          |
| Slc2a1        |
| Hk2           |
| Preli2        |
| Actg1         |
| Vegfa         |
| Pgk1          |
| Ero1l         |
| Gapdh         |
| Pkm           |
| Gpi1          |
| Fam162a       |
| Pdk1          |
| Lgals3        |
| Cited1        |
| Pgam1         |
| Higd1a        |
| Bhlhe41       |
| Eif1          |
| Hspa9         |
| Tmod1         |
| Ndr1          |
| C77080        |
| Chchd10       |
| Phlda1        |
| Atp6v1g1      |

|            |
|------------|
| Fau        |
| mt-Co1     |
| Irx3       |
| Alkbh5     |
| Gabarap    |
| Rps21      |
| Npm1       |
| Bnip3l     |
| St13       |
| Adm        |
| Pfkl       |
| Syt4       |
| Rpl22      |
| Pfkp       |
| Gpnmb      |
| Rpl17      |
| Rpl30      |
| Vldlr      |
| Lgals1     |
| Cd274      |
| Gdf15      |
| Tpt1       |
| P4ha1      |
| Rpl27a     |
| Ago2       |
| Rpl38      |
| AC160336.1 |
| Fam104a    |
| Mkrn1      |
| Rps24      |
| Fnip1      |
| Lrrfip1    |
| Ugcg       |
| Rpl36      |
| Atf4       |
| Rpl23      |
| Rps27      |
| Arhgap6    |
| Rps10      |
| Abca1      |
| Bhlhe40    |
| Rplp1      |
| Cd63       |
| Hsp90aa1   |
| Atp6v1a    |
| Rpl26      |

|          |
|----------|
| Rps28    |
| Rpl18a   |
| Eif2s2   |
| Rpl24    |
| Dip2b    |
| Rpl5     |
| Rps5     |
| Rps29    |
| Rps16    |
| Rps15    |
| Eif4a2   |
| Psmc8    |
| Atp5g2   |
| Zyx      |
| Rps14    |
| Actr3    |
| Rps3a1   |
| Rpl14    |
| Eif4ebp1 |
| Rpl37    |
| mt-Co2   |
| Mt2      |
| Cystm1   |
| Rpl35a   |
| Rabac1   |
| Rpl13    |
| Naa50    |
| Rragd    |
| Eef1d    |
| Rpl34    |
| Atp6v0b  |
| Rora     |
| Aff3     |
| Gas2l3   |
| Bri3     |
| Cfl2     |
| Plekhf2  |
| Vat1     |
| Hnrnpc   |
| Rpsa     |
| Rps23    |
| Rpl37a   |
| Rplp2    |
| Rps15a   |
| Ddit3    |
| Rps12    |

|          |
|----------|
| Naca     |
| Plekhm2  |
| St3gal1  |
| Eno1     |
| Gyg      |
| Ft11     |
| Fbln7    |
| Met      |
| Egln1    |
| Pnrc1    |
| Pkn2     |
| Rpl4     |
| Rps7     |
| Ahnak    |
| Kdm3a    |
| Mxi1     |
| Fam96b   |
| Pdcd5    |
| Pla2g2e  |
| Crebrf   |
| Ndufb9   |
| Mgl1     |
| Lhfp12   |
| Mt1      |
| Zfand5   |
| Fam50a   |
| Atp6v1b2 |
| Cd44     |
| Atp6ap2  |
| Clybl    |
| Ppargc1a |
| Eif3c    |
| Tpm4     |
| Slc3a2   |
| Uqcrh    |
| Vegfb    |
| Nceh1    |
| Larp4    |
| Sars     |
| Dnajc21  |
| Akap2    |
| Cdv3     |
| Scaf11   |
| Ppfibp2  |
| Atf3     |
| Arl8b    |

|            |
|------------|
| Vapa       |
| Dusp8      |
| Gabarapl1  |
| Rlf        |
| Sun2       |
| Atf5       |
| Vps35      |
| Preli1     |
| Srrm1      |
| Tceal9     |
| Lyst       |
| Patl1      |
| Usf2       |
| Arpp19     |
| Tfrc       |
| Ptpnj      |
| Eea1       |
| Nars       |
| Arhgap5    |
| Ubl3       |
| Nampt      |
| Rnf19a     |
| Herpud1    |
| Tmem140    |
| Pmel       |
| C1qbp      |
| Fxyd3      |
| Cebpg      |
| H1f0       |
| Trappc6a   |
| Gnl3       |
| Csrp1      |
| Klf6       |
| Zfp622     |
| Fermt2     |
| Mthfd2     |
| Epb41l4aos |
| Ppp1r15a   |
| Golga4     |
| Igf2bp2    |
| Cmtm4      |
| Stam       |
| Cpeb4      |
| Selenop    |
| Rragc      |
| Socs6      |

|           |
|-----------|
| Atp6v1h   |
| Ate1      |
| Neat1     |
| Glul      |
| Kit       |
| Slc7a1    |
| Lcorl     |
| Dhrs3     |
| Jmjd6     |
| Xpo1      |
| Hspa1a    |
| Gm26917   |
| Gadd45b   |
| Ahr       |
| Igf2bp3   |
| Zfp292    |
| Agfg1     |
| P3h2      |
| Ccny      |
| Tnfrsf12a |
| Hmox1     |
| Ebf1      |
| Tshz2     |
| Lama2     |
| Runx1t1   |
| Piezo2    |
| Tln2      |
| Epb41l3   |
| Egfr      |
| Bicc1     |
| Ebf2      |
| Adamts2   |
| Osmr      |
| Ddr2      |
| Col28a1   |
| Slit3     |
| Scn7a     |
| Mrc2      |
| Col6a3    |
| Sned1     |
| Clmp      |
| Tshz3     |
| Pdgfrb    |
| Itga1     |
| Fap       |
| Gxylt2    |

|         |
|---------|
| Islr    |
| Colec12 |
| Klf5    |
| Gpx8    |
| Col14a1 |
| Abca8a  |
| Col4a2  |
| Tns1    |
| Actn1   |
| Cldn1   |
| Pcdh19  |
| Fndc1   |
| Gm12840 |
| Ntrk2   |
| Col4a1  |
| Sulf1   |
| Stra6   |
| Slc43a3 |
| Steap4  |
| Gpc3    |
| Prrx1   |
| Ltbp4   |
| Loxl2   |
| Col8a1  |
| Medag   |
| Thbs4   |
| Fbn1    |
| Cd248   |
| Pear1   |
| Ccdc80  |
| Loxl1   |
| Emilin2 |
| Inhba   |
| Lbp     |
| Col5a2  |
| Cpxm1   |
| Igfbp7  |
| Mfap2   |
| Entpd2  |
| Cdh11   |
| Fbn2    |
| Ccl11   |
| Tnxb    |
| Cd34    |
| Col1a1  |
| Ecscr   |

|          |
|----------|
| Lepr     |
| Serping1 |
| Dmd      |
| Col3a1   |
| Col15a1  |
| Col1a2   |
| Cygb     |
| Pdpn     |
| Col6a2   |
| Meg3     |
| Smoc2    |
| Nfix     |
| Ctsk     |
| Abi3bp   |
| Dcn      |
| Phldb2   |
| Dock5    |
| C1s1     |
| Tgfb1    |
| Col6a1   |
| Lamb1    |
| Bgn      |
| Man1a    |
| Pcolce   |
| Serpinf1 |
| Lsp1     |
| Sparc    |
| Rdh10    |
| Fstl1    |
| Fzd2     |
| Plac8    |
| Igfbp6   |
| Mndal    |
| Mfap5    |
| Ifi203   |
| Id3      |
| Rarres2  |
| Hk2      |
| Gfpt2    |
| Ptch1    |
| Thy1     |
| Runx1    |
| Ccl2     |
| Nbl1     |
| Nid1     |
| Lum      |



|               |
|---------------|
| Ahnak         |
| Hspg2         |
| Pdzd2         |
| Csrp2         |
| Col5a3        |
| Efemp1        |
| Apod          |
| Col5a1        |
| Fosl2         |
| Ly6e          |
| Nrp1          |
| Ndrp1         |
| 6030408B16Rik |
| Sfn5          |
| Heg1          |
| C3            |
| Mid1          |
| Pdgfra        |
| Lhfp          |
| Cxcl1         |
| Cthrc1        |
| Serpine1      |
| Dock9         |
| Atp8b1        |
| Vcan          |
| Nr2f2         |
| Myo1b         |
| Igfbp5        |
| Mical2        |
| Itm2a         |
| Il33          |
| Col18a1       |
| Ehd2          |
| Cp            |
| Lamc1         |
| Birc3         |
| Rnase4        |
| Mast4         |
| Pdlim4        |
| Impact        |
| Sfrp4         |
| Pim1          |
| Cfh           |
| Peak1         |
| Ly6a          |
| H6pd          |

|          |
|----------|
| Pkdcc    |
| Nhs12    |
| Adamts9  |
| Igfbp3   |
| Tnfaip3  |
| Nupr1    |
| Efnb2    |
| Bhlhe40  |
| Hivep2   |
| Pltp     |
| Mmp14    |
| Svil     |
| Abca8b   |
| Cgnl1    |
| Ankrd44  |
| Thbd     |
| Rock2    |
| Icam1    |
| Dcbld2   |
| Cyr61    |
| Rbms1    |
| Mxra8    |
| S100a11  |
| Ppic     |
| S100a6   |
| Cxcl2    |
| Aig1     |
| Serpine2 |
| Ank2     |
| Sgk1     |
| Gng11    |
| Epb41l2  |
| Fam110b  |
| Gda      |
| Serpinh1 |
| Timp3    |
| Lrp1     |
| Egr3     |
| Man2a1   |
| Matn2    |
| Igsf10   |
| Aldh1a3  |
| Nbeal1   |
| Xist     |
| Clic4    |
| Marcks   |

|           |
|-----------|
| Vmp1      |
| Il6st     |
| Tcf4      |
| Ccl7      |
| Socs3     |
| Bnc2      |
| Jak1      |
| Cebpd     |
| Tgm2      |
| Igf1      |
| Ifitm2    |
| Bzw2      |
| Fgfr1     |
| Aebp1     |
| Cavin1    |
| C1qtnf6   |
| Irf1      |
| Dot1l     |
| Spred1    |
| Synpo     |
| Phldb1    |
| Ccn1      |
| Tpm4      |
| Nfkbiz    |
| Ifrd1     |
| Olfml3    |
| Noct      |
| Grn       |
| Lrrk1     |
| Plpp3     |
| Emp1      |
| Tgfbr2    |
| Fndc3b    |
| Tpm1      |
| Cdk6      |
| Tmem64    |
| Dab2      |
| Serpinb6a |
| Prelp     |
| Prss23    |
| Kdm6b     |
| Sep-11    |
| Dcakd     |
| Bmp1      |
| Sema7a    |
| Sdc2      |

|          |
|----------|
| Malt1    |
| Skil     |
| Arl4a    |
| Fam102b  |
| Btg2     |
| Frmd6    |
| Parva    |
| Nfkbia   |
| Mmp2     |
| Fbln2    |
| Oaf      |
| Efnb1    |
| Apbb2    |
| Atp2b1   |
| Nr4a1    |
| Copz2    |
| Thbs2    |
| Sh3bgrl3 |
| Rai14    |
| Scd1     |
| Ugdh     |
| Zfp36    |
| Nfkb1    |
| Neat1    |
| Errfi1   |
| ligp1    |
| Plxnd1   |
| Fem1b    |
| Nr4a2    |
| Gpx3     |
| Map1lc3a |
| Cebpb    |
| Postn    |
| Atf3     |
| Arl5b    |
| Bcr      |
| Clcn5    |
| Crip1    |

**Supplementary Table 2**

Functionally enriched terms for top 120-150 sign. overexpressed in each Seurat cluster, related to Fig.1c. (Fisher exact test, two-tailed p value).

**Seurat cluster 0****Melanocytic**

| <b>Diseases or Functions Annotation</b> | <b>p-value</b> |
|-----------------------------------------|----------------|
| Development of melanocytes              | 0,00000012     |
| Formation of melanosomes                | 0,000000851    |
| Synthesis of melanin                    | 0,00000288     |
| Oxidative Phosphorylation               | 1,16E-24       |

**Seurat cluster 1****Neural Crest-like**

| <b>Diseases or Functions Annotation</b> | <b>p-value</b> |
|-----------------------------------------|----------------|
| Central nervous system solid tumor      | 3,82E-08       |
| Glioblastoma                            | 8,81E-08       |
| Proliferation of neuronal cells         | 0,00000193     |
| Proliferation of neuroglia              | 5,27E-05       |

**Seurat cluster 2****RNA processing**

| <b>Diseases or Functions Annotation</b> | <b>p-value</b> |
|-----------------------------------------|----------------|
| Nuclear speckle                         | 4,45E-09       |
| mRNA processing                         | 3,11E-08       |
| RNA splicing                            | 4,18E-08       |

**Seurat cluster 3****Antigen Presentation**

| <b>Diseases or Functions Annotation</b> | <b>p-value</b> |
|-----------------------------------------|----------------|
| Antigen processing and presentation     | 1,79E-09       |
| Interferon signaling                    | 6,54E-29       |

**Seurat cluster 4****Stem-like**

| <b>Diseases or Functions Annotation</b> | <b>p-value</b> |
|-----------------------------------------|----------------|
| Cancer Stem cell:Undefined              | 7,26E-05       |
| Neural Stem cell:Brain                  | 0,001769754    |
| Neural Tube cell:Germ                   | 0,002893695    |
| Embryonic Stem cell                     | 3,23E-15       |
| Quintens embryonic brain response to IR | 6,20E-48       |

**Seurat cluster 5****Stress-like (hypoxia)**

| <b>Diseases or Functions Annotation</b> | <b>p-value</b> |
|-----------------------------------------|----------------|
| Hypoxia                                 | 6,72E-19       |
| mTORC1 Signaling                        | 1,83E-11       |

|            |          |
|------------|----------|
| Glycolysis | 1,84E-10 |
|------------|----------|

| <b>Seurat cluster 6</b>                 |                |
|-----------------------------------------|----------------|
| <b>Mesenchymal-like</b>                 |                |
| <b>Diseases or Functions Annotation</b> | <b>p-value</b> |
| Epithelial Mesenchymal Transition       | 3,16E-32       |
| Multicancer invasiveness signature      | 1,70E-37       |

**Supplement**

Functionally enriched gene expression signature

| <b>Stem-like</b> | <b>Neural Crest-like</b> | <b>Mesenchymal-like</b> | <b>RNA processing</b> |
|------------------|--------------------------|-------------------------|-----------------------|
| Gtse1            | Tfap2b                   | Fap                     | Pabpn1                |
| Cep170b          | Prnp                     | Lama2                   | Ccnl1                 |
| Tap1             | Mef2c                    | Prrx1                   | Pnlsr                 |
| Ercc5            | Gfra1                    | Slit3                   | Sfpq                  |
| Kank3            | Cd200                    | Abi3bp                  | Ccnl2                 |
| Rap2a            | Syt11                    | Loxl1                   | Bclaf1                |
| Ei24             | Thsd7a                   | Cdh11                   | Hnrnpu                |
| Zmat3            | Cxxc4                    | Col6a3                  | Rbm25                 |
| Fas              | Sema5a                   | Col6a2                  | Luc7l2                |
| Igdcc4           | Tbx3                     | Loxl2                   | Ddx17                 |
| Notch3           | Kif26b                   | Mfap5                   | Cpsf6                 |
| Vcan             | Efhd1                    | Fbn1                    | Snrnp70               |
| Mybl1            | Neto2                    | Col4a2                  | Srek1                 |
| Dusp15           | Hmcn1                    | Pcolce                  | Prpf4b                |
| Dgka             | Igsf10                   | Lum                     | Srrm2                 |
| Nrp1             | Olfml3                   | Col4a1                  | Rbm39                 |
| Slc27a3          | Rgs2                     | Col5a2                  | Son                   |
| Slc19a2          | Nt5e                     | Thy1                    | Ddx5                  |
| Dgki             | Morc4                    | Fbn2                    | Prpf38b               |
| Siva1            | Aqp1                     | Bgn                     | Pan3                  |
| Rbm38            | Gfra2                    | Tgfbi                   | Tra2a                 |
| Cad              | Wnt4                     | Pdgfrb                  | Hnrnph1               |
| Mcm7             | Abcg2                    | Sulf1                   | Fus                   |
| Nme4             | Elovl5                   | Inhba                   |                       |
| Thyn1            | Emilin1                  | Col1a1                  |                       |
| Gpx3             | Fibin                    | Col3a1                  |                       |
| Arl4c            |                          | Col1a2                  |                       |
| Ass1             |                          | Ctsk                    |                       |
| Efnb2            |                          | Dcn                     |                       |
| Frrs1            |                          | Serpinf1                |                       |
| Sdc1             |                          | Sparc                   |                       |
| Itga6            |                          | Fstl1                   |                       |
| Icam1            |                          |                         |                       |
| Chst3            |                          |                         |                       |
| Nes              |                          |                         |                       |
| Sox4             |                          |                         |                       |
| Fat1             |                          |                         |                       |
| Angptl2          |                          |                         |                       |
|                  |                          |                         |                       |
|                  |                          |                         |                       |
|                  |                          |                         |                       |
|                  |                          |                         |                       |

**Supplementary Table 2**

Genes related to Fig.1d, e, g and Extended Data 1,2

| <b>Antigen Presentation</b> | <b>Stress-like (hypoxia)</b> | <b>Melanocytic (Oxphos)</b> |
|-----------------------------|------------------------------|-----------------------------|
| Gbp4                        | Bnip3                        | Mlph                        |
| Gbp6                        | Tpi1                         | Mitf                        |
| Irf1                        | Slc2a1                       | Mlana                       |
| Nlrc5                       | Mif                          | Pmel                        |
| Stat2                       | Vldlr                        | Slc45a2                     |
| Cd74                        | Hk2                          | ApoE                        |
| Il12rb1                     | Vegfa                        | Dct                         |
| B2m                         | Ldha                         | Gpnmb                       |
| Gbp2                        | Pfkf1                        | Tyr                         |
| Ifit3                       | P4ha1                        | Cited1                      |
| Gbp3                        | Fam162a                      | Bace2                       |
| Psmb8                       | Bhlhe40                      | Cox17                       |
| Stat1                       | Pgk1                         | Cox7a2                      |
| Ifit1                       | Aldoa                        | Ndufb2                      |
| Isg15                       | Pfkf1                        | Ndufb4                      |
| Psmb9                       | Pdk1                         | Uqcr10                      |
| Gbp7                        | Hspa9                        | Uqcrb                       |
| Xaf1                        | Pgam1                        |                             |
| Tap1                        | Pkm                          |                             |
| Gbp5                        | Atf4                         |                             |
| Usp18                       |                              |                             |
| Ciita                       |                              |                             |
| Irf7                        |                              |                             |
| Ube2l6                      |                              |                             |
| Tap2                        |                              |                             |
| Psme1                       |                              |                             |
| Ifitm3                      |                              |                             |
| Psme2                       |                              |                             |
| Tapbp                       |                              |                             |
| Ifi35                       |                              |                             |
| Eif2ak2                     |                              |                             |
| Irf9                        |                              |                             |
| Ddx58                       |                              |                             |
| Trim25                      |                              |                             |
| Ifit2                       |                              |                             |
| Irf8                        |                              |                             |
| H2-DMa                      |                              |                             |
| H2-Aa                       |                              |                             |
| H2-DMb1                     |                              |                             |
| H2-Eb1                      |                              |                             |
| H2-Ab1                      |                              |                             |
| H2-T23                      |                              |                             |



### Supplementary Table 4

Parameters estimated from the fit of the bi-exponential decay to the CDF of clone sizes for each section of the Supplementary Note, Fig. 2f and Extended data Fig. 4b-e). The chase time ( $t_0$ ), total number of singlets (single cell clones) are shown for each sample, together with the average clone sizes and measured tumour expansion relative to its volume at the start of the chase period. In finding the long term decay, the fitted values for the large and small clone size decays,  $\bar{n}$  and  $\bar{n}_p$ ,  $p_0$ , are shown. These fits were made by first removing single cell clones from the data, to account for proliferative cells, using a least-square method (see Supplementary Note).

| Sample | Channel | Sample information   |                  |                    |                         |                  | Clone size threshold |
|--------|---------|----------------------|------------------|--------------------|-------------------------|------------------|----------------------|
|        |         | Chase time ( $t_0$ ) | Number of clones | Number of singlets | Avg. clone size (cells) | Tumour expansion |                      |
| 1      | RFP     | 30                   | 128              | 88                 | 5,6                     | 10,2             | 20,5                 |
|        | YFP     |                      | 111              | 76                 | 7,0                     |                  | 19,4                 |
| 2      | RFP     | 25                   | 338              | 223                | 8,0                     | 7,8              | 27,0                 |
|        | YFP     |                      | 301              | 218                | 7,9                     |                  | 37,0                 |
| 3      | YFP     | 35                   | 487              | 389                | 4,4                     | 10,8             | 25,7                 |
| 4      | RFP     | 70                   | 330              | 220                | 6,3                     | 14,1             | 32,0                 |
|        | YFP     |                      | 317              | 206                | 7,9                     |                  | 32,0                 |
| 5      | RFP     | 70                   | 239              | 161                | 4,1                     | 9,8              | 26,0                 |
|        | YFP     |                      | 148              | 102                | 6,0                     |                  | 31,3                 |

\_\_\_\_\_

n sample (see Model fits  
total number of clones and  
clone size (considering all  
The clone size threshold for  
, and composite parameter  
not only for clones rooted in

| Fitted parameters |                   |                     |
|-------------------|-------------------|---------------------|
| $p_0/(1-s(t))$    | $\bar{n}$ (cells) | $\bar{n}_p$ (cells) |
| 0,23              | 63,3              | 3,7                 |
| 0,18              | 90,8              | 8,5                 |
| 0,23              | 66,4              | 5,8                 |
| 0,25              | 82,4              | 4,1                 |
| 0,18              | 65,7              | 4,6                 |
| 0,30              | 40,6              | 4,9                 |
| 0,35              | 45,0              | 4,9                 |
| 0,08              | 89,7              | 4,1                 |
| 0,11              | 171,2             | 4,0                 |

### Supplementary Table 5

Parameters of the two-compartment stem-progenitor cell model, estimated using the fitted values for the the large and small clone size decays,  $\bar{n}$  and  $\bar{n}_p$ , and composite parameter  $p_0$  (see Supplementary Table 4), together with the predictor tumour volume. The parameters shown here were used in the numerical simulations of the full stochastic model (see Supplementary Note and Extended Data Fig. 4g-k).

|        |         | Estimated model parameters        |                                     |                                         |                                          |                                                |                               |
|--------|---------|-----------------------------------|-------------------------------------|-----------------------------------------|------------------------------------------|------------------------------------------------|-------------------------------|
| Sample | Channel | Stem cell duplication Prob. ( r ) | Stem cell cycling rate ( $\sigma$ ) | Stem cell expansion rate ( $\Delta_s$ ) | Progenitor expansion rate ( $\Delta_p$ ) | Fraction of stem cell-derived clones ( $f_s$ ) | Predicted tumour volume ( V ) |
| 1      | RFP     | 0,75                              | 0,22                                | 0,11                                    | 0,04                                     | 0,25                                           | 13,63                         |
|        | YFP     | 0,75                              | 0,25                                | 0,12                                    | 0,07                                     | 0,17                                           | 18,08                         |
| 2      | RFP     | 0,75                              | 0,27                                | 0,14                                    | 0,07                                     | 0,23                                           | 15,20                         |
|        | YFP     | 0,75                              | 0,29                                | 0,14                                    | 0,06                                     | 0,25                                           | 17,38                         |
| 3      | YFP     | 0,75                              | 0,19                                | 0,10                                    | 0,04                                     | 0,19                                           | 12,52                         |
| 4      | RFP     | 0,75                              | 0,08                                | 0,04                                    | 0,02                                     | 0,29                                           | 11,84                         |
|        | YFP     | 0,75                              | 0,09                                | 0,04                                    | 0,02                                     | 0,32                                           | 13,35                         |
| 5      | RFP     | 0,75                              | 0,11                                | 0,05                                    | 0,02                                     | 0,10                                           | 9,63                          |
|        | YFP     | 0,75                              | 0,12                                | 0,06                                    | 0,02                                     | 0,12                                           | 17,82                         |

graft model and project

|                         |
|-------------------------|
| <b>Cell-type/state</b>  |
| <b>stress (hypoxia)</b> |
| <b>Endothelial Cell</b> |
| <b>pre-EMT</b>          |

| <b>Supplementary Table 6</b> |
|------------------------------|
|------------------------------|

|                                                                                                |
|------------------------------------------------------------------------------------------------|
| ed to Stereo-Seq technology to spatially resolve pre-EMT and hypoxic cell states in respect to |
|------------------------------------------------------------------------------------------------|

| <b>Markers</b> |
|----------------|
|----------------|

|                                                                                                    |
|----------------------------------------------------------------------------------------------------|
| <i>Rpl17, Rps24, Rpl38, Alkbh5, Gabarap, Rpl23, Cd63, Npm1, Rpl36, Bnip3l, Rpl22, P4ha1, R</i>     |
| <i>7, Emcn, Epas1, Esam, Esm1, Fabp4, Flt1, Flt4, Gpihbp1, Igfbp3, Inhbb, Kdr, Ldb2, Lrg1, Ltb</i> |
| <i>gpat4, Wdr35, Pde3b, Itga6, Ak1, Ptprt, Serpine2, Casp3, Frmd4b, Klhl26, Rap2a, Btc, Tmem</i>   |

*os5, Rps27, St13, Ifit1, Rpl24, Pfkp, Rabac1, Lrrfip1, Gpnmb, Rps28, Rps16, Rpl18a, At  
p4, Mgl1, Mmrn2, Myct1, Pcdh17, Pecam1, Plxna2, Podxl, Prex2, Prss23, Ptprb, Ramp2  
184c, Ift27, Nes, Pak3, Mdm2, Palm3, Fosl1, Synm, Plekha7, 2600006K01Rik, Tbc1d8,*

*dm, Rplp1, Rpl26, Bhlhe40, Rpl5, Psmc8, Isg15, Eno1, Rps15, Mt2, Cystm1, Hsp90aa1,  
Ddit4l, Dgki, Samd12, Vopp1, Ass1, Igsf9b, Slitrk5, Cgref1, Cald1, Plxdc2, Slc37a2, Siv*

*Rpl13, Abca1, Syt4, Rps14, Mkrn1, Rpl37, Rps29, Pla2g2e, Atp5g2, Eef1d, Rpl14, Eif2*



*?*s2, *Aff3*, *Rps3a1*, *Atf4*, *Rpl35a*, *Fam104a*, *Gdf15*, *Egln1*, *Frip1*

### Supplementary Table 7

Molecular Cartography probes used in this study. The discriminative markers were selected based on scRNA seq of *Tyr::NRASQ61K<sup>o</sup>;Ink4a<sup>-/-</sup>* allograft model to spatially resolve cell type and melanoma cell state diversity. Related to Fig. 3e,f and Extended Data Fig. 6h,i,k,m.

| <b>CatNo</b> | <b>Target</b>      | <b>Gene Name</b> |
|--------------|--------------------|------------------|
| P0660        | ENSMUSG00000040592 | <i>Cd79b</i>     |
| P076L        | ENSMUSG00000026011 | <i>Ctla4</i>     |
| P096Y        | ENSMUSG00000031494 | <i>Cd209a</i>    |
| P0N6K        | ENSMUST00000032217 | <i>Lag3</i>      |
| P1254        | ENSMUSG00000039521 | <i>Foxp3</i>     |
| P1562        | ENSMUST00000087723 | <i>Notch3</i>    |
| P1760        | ENSMUSG00000035158 | <i>Mitf</i>      |
| P1C1R        | ENSMUSG00000030789 | <i>Itgax</i>     |
| P1R2D        | ENSMUSG00000024621 | <i>Csf1r</i>     |
| P2563        | ENSMUSG00000028943 | <i>Espn</i>      |
| P2662        | ENSMUST00000003469 | <i>Cd79a</i>     |
| P2761        | ENSMUST00000025719 | <i>Mlana</i>     |
| P296L        | ENSMUSG00000027239 | <i>Mdk</i>       |
| P3564        | ENSMUSG00000034818 | <i>Celf5</i>     |
| P3663        | ENSMUSG00000030724 | <i>Cd19</i>      |
| P3960        | ENSMUST00000033310 | <i>Mki67</i>     |
| P3F4T        | ENSMUSG00000004730 | <i>Adgre1</i>    |
| P4565        | ENSMUST00000054125 | <i>Pmel</i>      |
| P4961        | ENSMUST00000033050 | <i>Lyve1</i>     |
| P5566        | ENSMUSG00000032202 | <i>Rab27a</i>    |
| P5962        | ENSMUST00000027507 | <i>Pdcd1</i>     |
| P6567        | ENSMUST00000036181 | <i>Car14</i>     |
| P6952        | ENSMUSG00000026193 | <i>Fn1</i>       |
| P6963        | ENSMUST00000016640 | <i>Cd274</i>     |
| P6R7Q        | ENSMUSG00000029108 | <i>Pcdh7</i>     |
| P7568        | ENSMUST00000044105 | <i>Tspan10</i>   |
| P7667        | ENSMUSG00000026678 | <i>Rgs5</i>      |
| P7R7R        | ENSMUSG00000020592 | <i>Sdc1</i>      |
| P8569        | ENSMUST00000034903 | <i>Gsta4</i>     |
| P8668        | ENSMUST00000039631 | <i>Acta2</i>     |
| P8R7S        | ENSMUST00000001319 | <i>Efnb2</i>     |
| P956A        | ENSMUST00000061483 | <i>Bmyc</i>      |
| PA56C        | ENSMUSG00000037649 | <i>H2-DMa</i>    |
| PAJ70        | ENSMUSG00000030786 | <i>Itgam</i>     |
| PAR7V        | ENSMUSG00000022385 | <i>Gtse1</i>     |
| PC56D        | ENSMUSG00000040033 | <i>Stat2</i>     |
| PC66C        | ENSMUST00000113516 | <i>Kdr</i>       |
| PC869        | ENSMUSG00000000628 | <i>Hk2</i>       |
| PCR1P        | ENSMUSG00000004891 | <i>Nes</i>       |

|       |                    |                 |
|-------|--------------------|-----------------|
| PCR7W | ENSMUSG00000042662 | <i>Dusp15</i>   |
| PD56E | ENSMUSG00000078853 | <i>Igtp</i>     |
| PD86A | ENSMUSG00000022103 | <i>Gfra2</i>    |
| PDG41 | ENSMUSG00000020122 | <i>Egfr</i>     |
| PDR7X | ENSMUSG00000058756 | <i>Thra</i>     |
| PE56F | ENSMUSG00000022504 | <i>Ciita</i>    |
| PEF43 | ENSMUSG00000051504 | <i>Siglech</i>  |
| PF56G | ENSMUST00000031542 | <i>Oasl2</i>    |
| PF86D | ENSMUSG00000068227 | <i>Il2rb</i>    |
| PFG43 | ENSMUSG00000026395 | <i>Ptprc</i>    |
| PFP5Z | ENSMUSG00000020717 | <i>Pecam1</i>   |
| PG56H | ENSMUSG00000078566 | <i>Bnip3</i>    |
| PH86F | ENSMUSG00000023132 | <i>Gzma</i>     |
| PJ56K | ENSMUSG00000031734 | <i>Irx3</i>     |
| PJ66J | ENSMUSG00000020241 | <i>Col6a2</i>   |
| PJ86G | ENSMUST00000169159 | <i>Ms4a1</i>    |
| PJM31 | ENSMUSG00000033006 | <i>Sox10</i>    |
| PK56M | ENSMUST00000006669 | <i>Pdk1</i>     |
| PK86H | ENSMUST00000029748 | <i>Fcgr1</i>    |
| PN56P | ENSMUST00000004774 | <i>Aqp1</i>     |
| PP56Q | ENSMUSG00000029802 | <i>Abcg2</i>    |
| PP86M | ENSMUSG00000030247 | <i>Kcnj8</i>    |
| PP96K | ENSMUST00000020668 | <i>Havcr2</i>   |
| PPC1C | ENSMUSG00000053477 | <i>Tcf4</i>     |
| PQ47T | ENSMUSG00000027111 | <i>Itga6</i>    |
| PQ56R | ENSMUST00000067458 | <i>Sema5a</i>   |
| PQ66Q | ENSMUST00000103134 | <i>Ccr7</i>     |
| PQ86N | ENSMUST00000034339 | <i>Cdh5</i>     |
| PQ95K | ENSMUSG00000018774 | <i>Cd68</i>     |
| PR25V | ENSMUSG00000026770 | <i>Il2ra</i>    |
| PR56S | ENSMUSG00000018604 | <i>Tbx3</i>     |
| PR66R | ENSMUST00000034231 | <i>Ccl22</i>    |
| PR86P | ENSMUST00000102517 | <i>Dll4</i>     |
| PS46V | ENSMUSG00000026586 | <i>Prrx1</i>    |
| PS56T | ENSMUST00000102832 | <i>Cd3e</i>     |
| PS66S | ENSMUSG00000046080 | <i>Clec9a</i>   |
| PT46W | ENSMUST00000045173 | <i>Tgfb1</i>    |
| PT86R | ENSMUSG00000000753 | <i>Serpinf1</i> |
| PTM6D | ENSMUST00000029846 | <i>Ccn1</i>     |
| PV46X | ENSMUST00000070630 | <i>Cd248</i>    |
| PV56W | ENSMUSG00000053977 | <i>Cd8a</i>     |
| PV86S | ENSMUSG00000028583 | <i>Pdpr</i>     |
| PVM6E | ENSMUST00000024044 | <i>Cd4</i>      |
| PW46Y | ENSMUST00000023807 | <i>Igfbp6</i>   |
| PW86T | ENSMUSG00000029581 | <i>Fscn1</i>    |
| PWM6F | ENSMUSG00000008845 | <i>Cd163</i>    |

|       |                    |               |
|-------|--------------------|---------------|
| PWS25 | ENSMUSG00000010175 | <i>Prox1</i>  |
| PX56Y | ENSMUSG00000062524 | <i>Ncr1</i>   |
| PX86V | ENSMUST00000182350 | <i>Xcr1</i>   |
| PXM6G | ENSMUST00000028045 | <i>Mrc1</i>   |
| PY46L | ENSMUST00000099151 | <i>Sox2</i>   |
| PY86W | ENSMUST0000006101  | <i>Itgae</i>  |
| PYD2M | ENSMUSG00000058715 | <i>Fcer1g</i> |
| PZ460 | ENSMUSG00000021614 | <i>Vcan</i>   |
| PZM6J | ENSMUSG00000040950 | <i>Mgl2</i>   |
